# Supplementary material for: Unraveling the structure–property relationships in fluorescent phenylhydrazones: the role of substituents and molecular interactions
Source: Royal Society of Chemistry journal article supplement (doi:10.1039/d4ra07856j), 2025-01-01
Supplement: d4ra07856j1.pdf [file d4ra07856j1.pdf]

Supplementary Information

**Unraveling the Structure-Property Relationships in Fluorescent Phenylhydrazones:  
The Role of Substituents and Molecular Interactions**

Paulina Sobczak <sup>a,b</sup>, Tomasz Sierański <sup>a</sup>, Marcin Świątkowski <sup>a</sup>, Agata Trzęsowska-Kruszyńska <sup>a</sup> and Jolanta Kolińska<sup>c</sup>

*a Institute of General and Ecological Chemistry, Lodz University of Technology, Zeromskiego 116, 90924, Lodz, Poland*

*b Łukasiewicz – Lodz Institute of Technology, M. Skłodowskiej-Curie 19/27, 90570 Lodz, Poland*

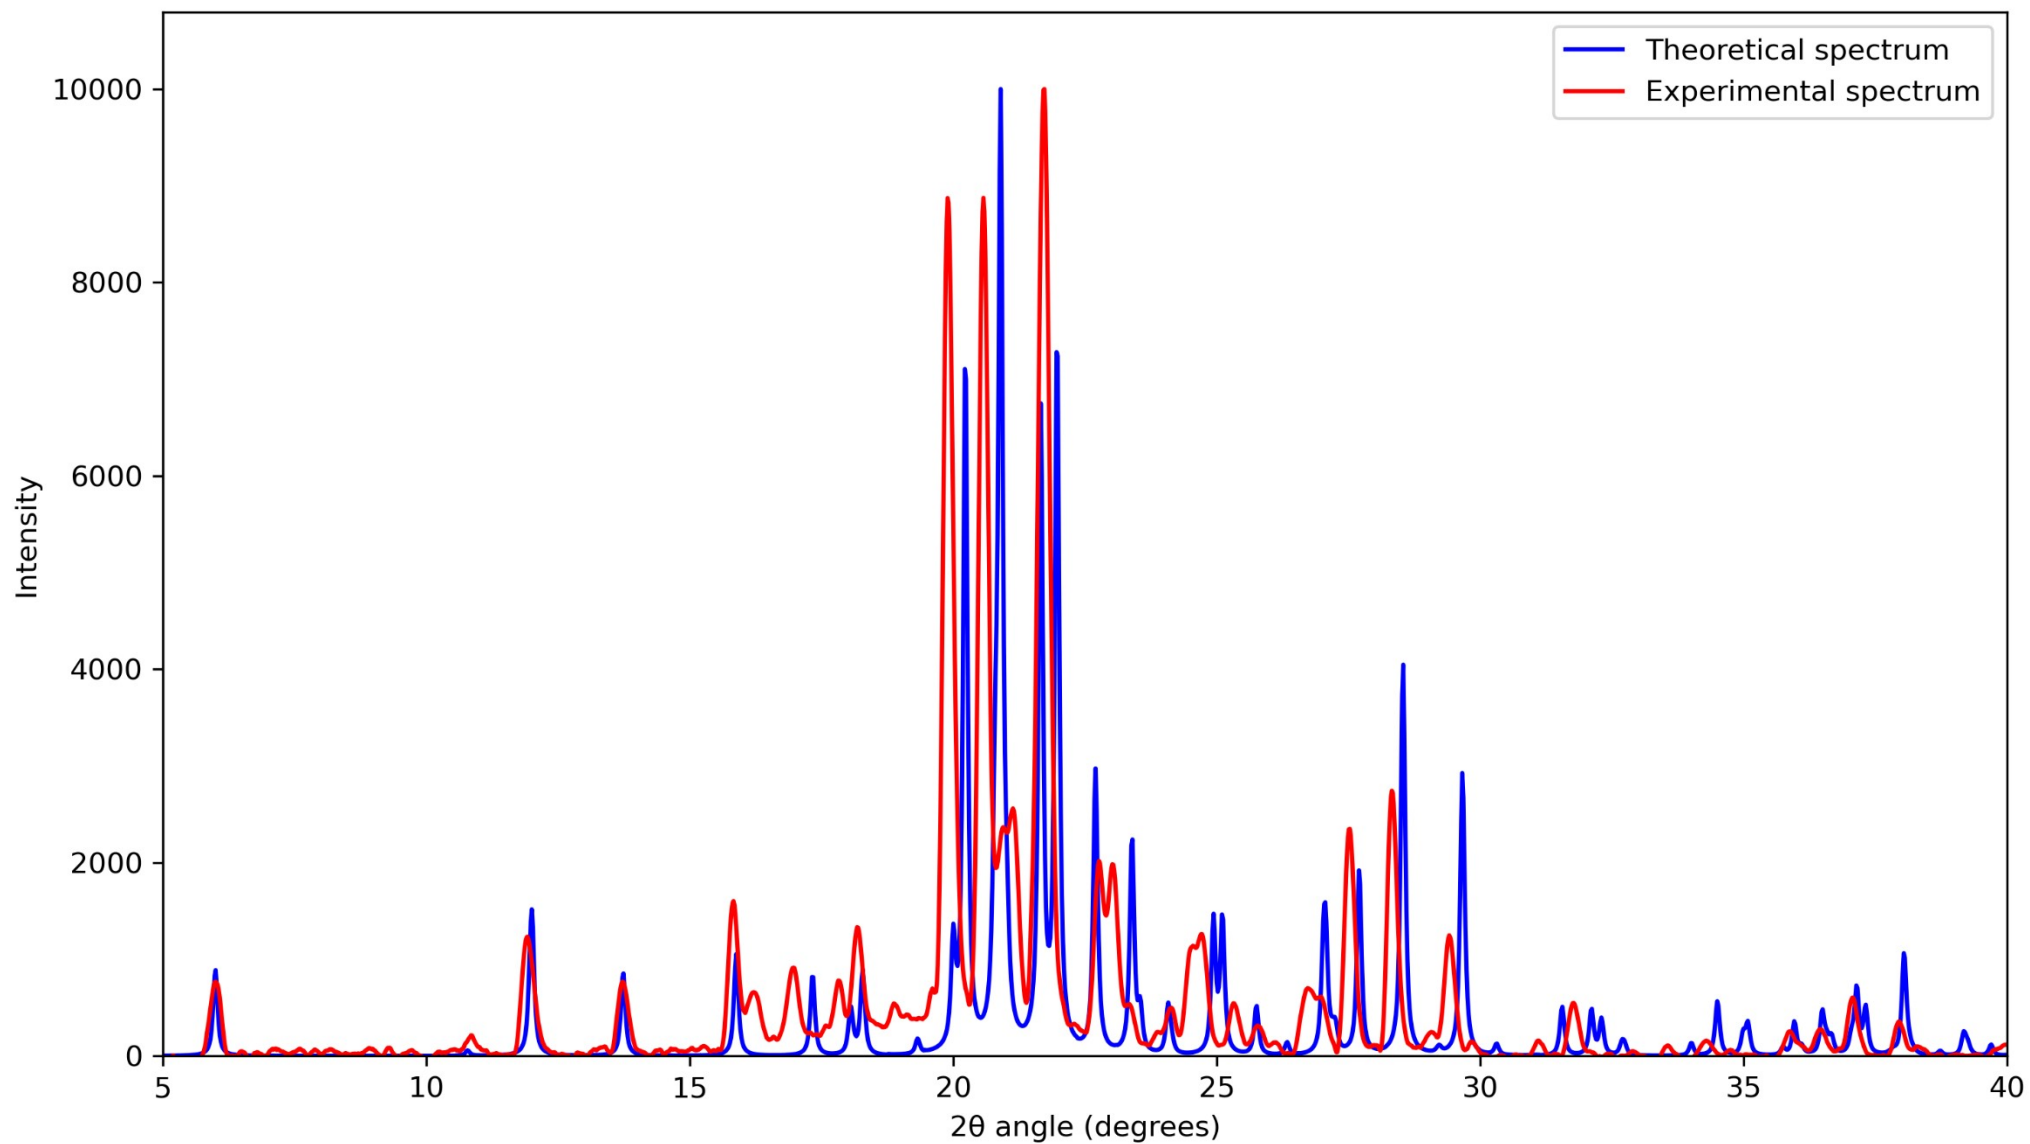

Figure S1. X-ray powder diffraction data of (*E*)-1-(4-methoxybenzylidene)-2-(4-methoxyphenyl)hydrazine (**1**).

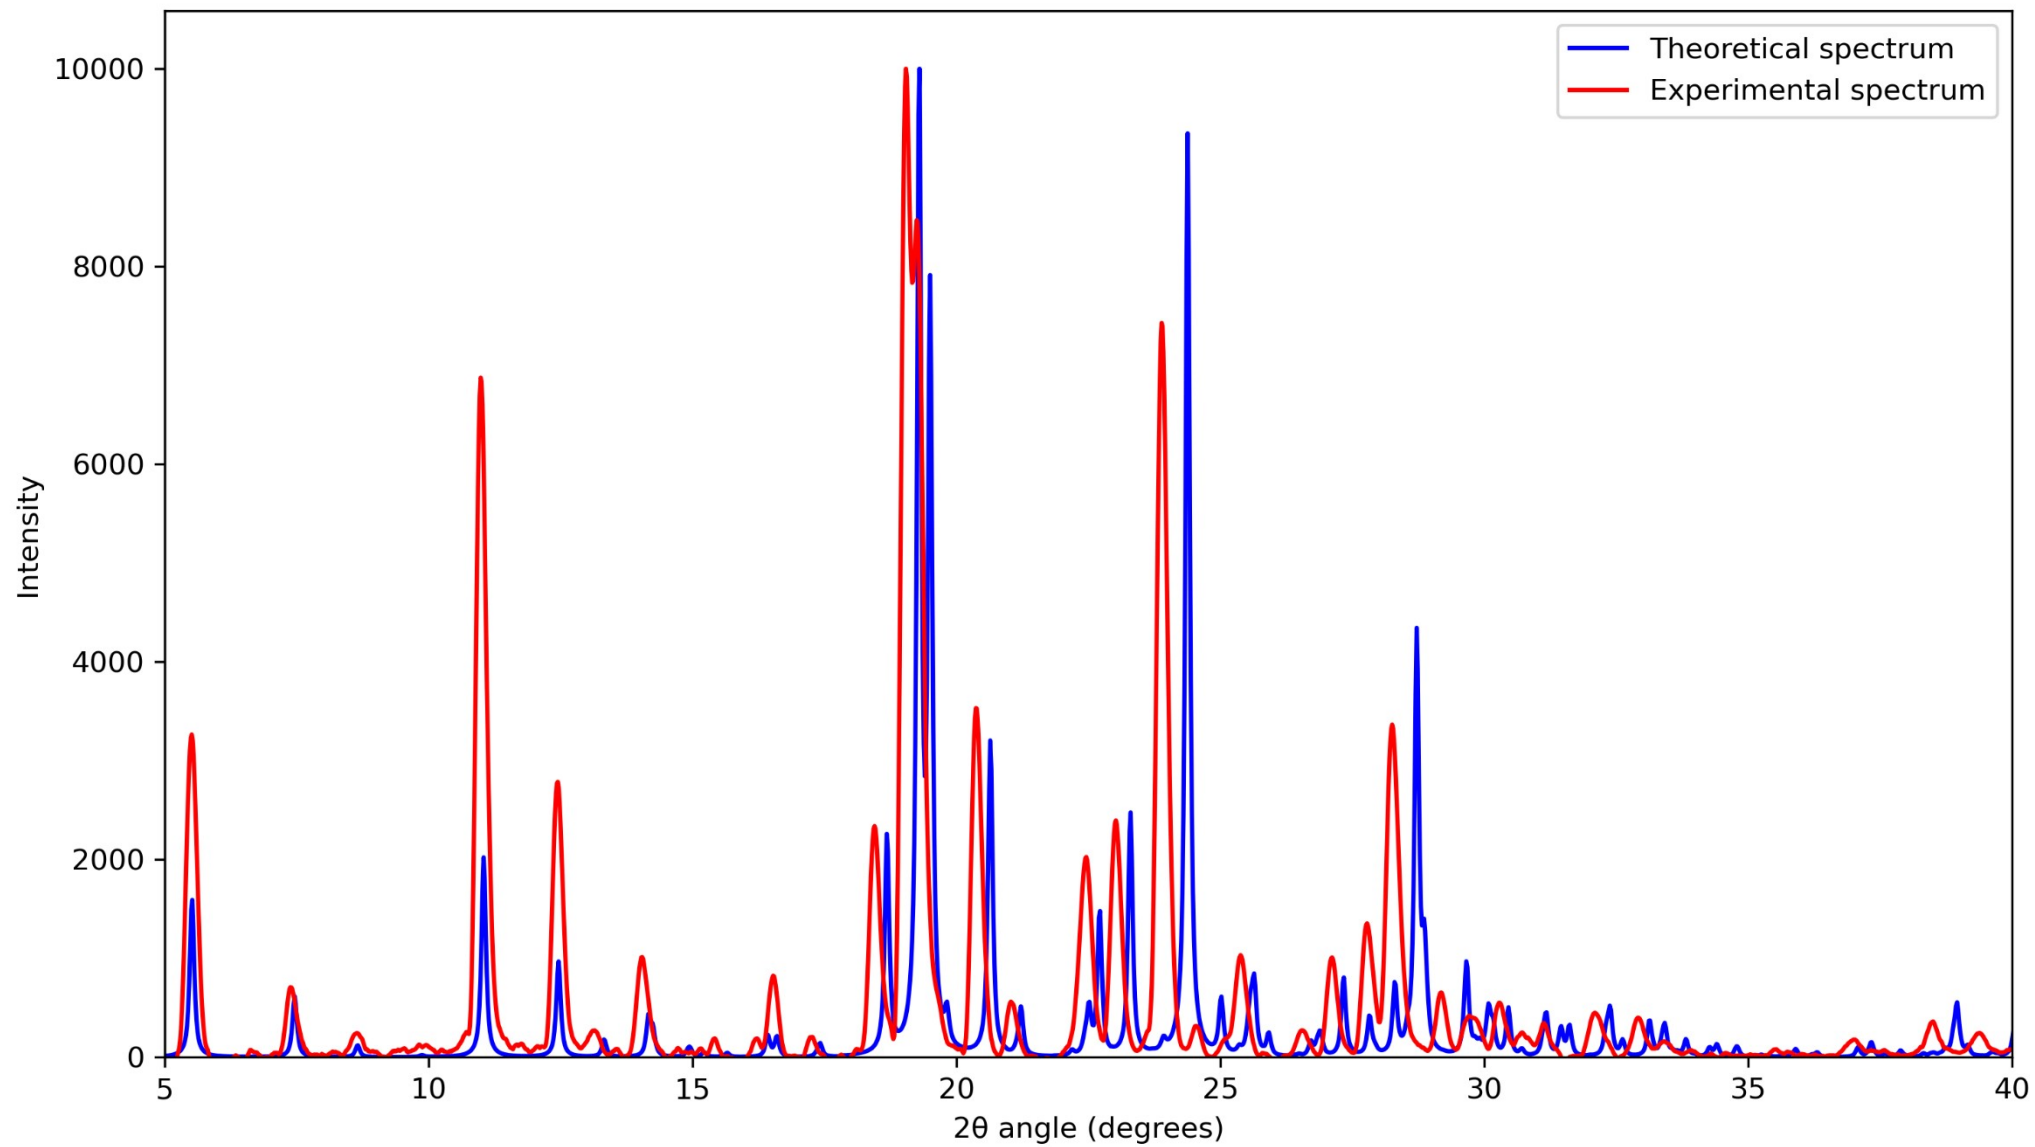

Figure S2. X-ray powder diffraction data of (*E*)-4-((2-(4-methoxyphenyl)hydrazineylidene)methyl)-*N,N*-dimethylaniline (**2**).

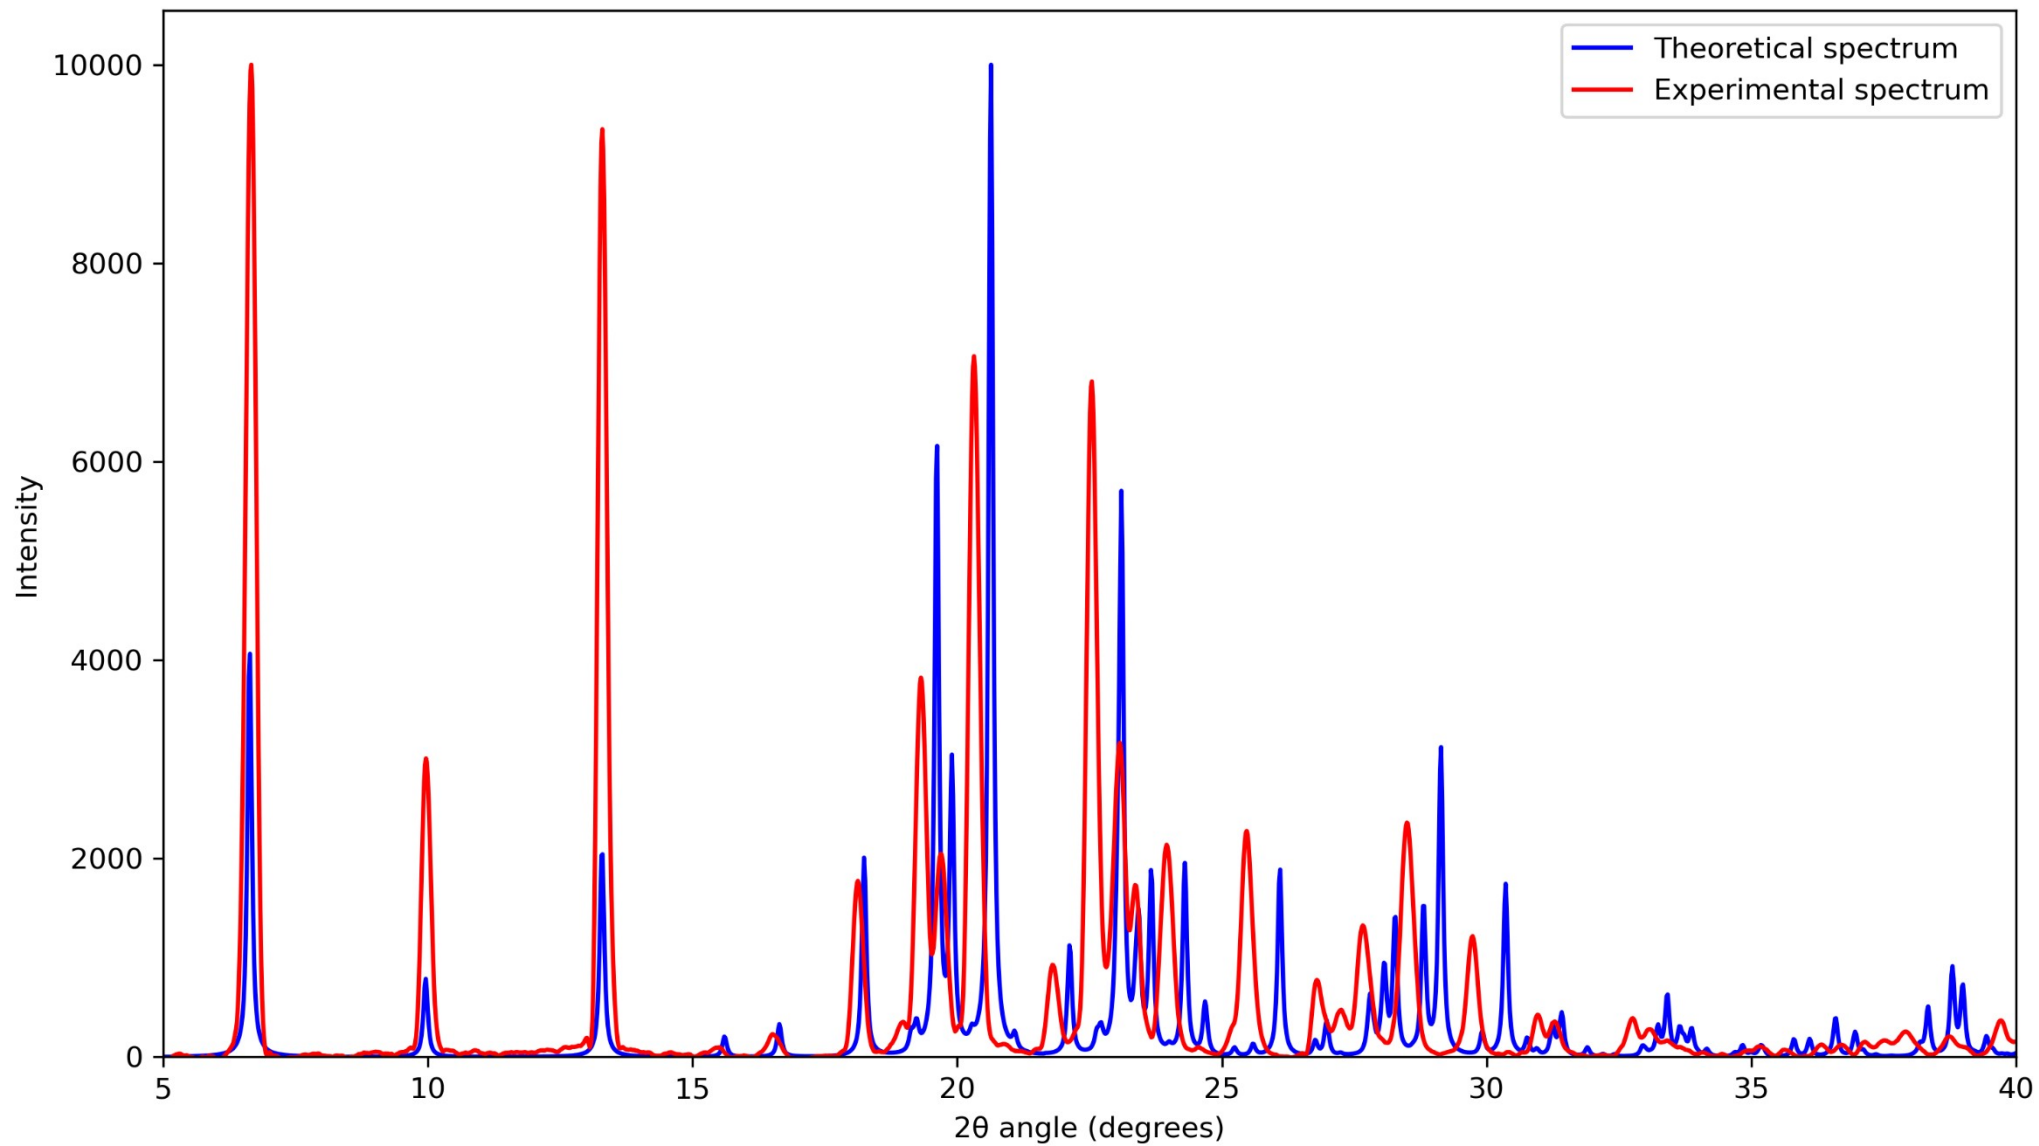

Figure S3. X-ray powder diffraction data of (*E*)-2-((2-(4-methoxyphenyl)hydrazineylidene)methyl)phenol (**3**).

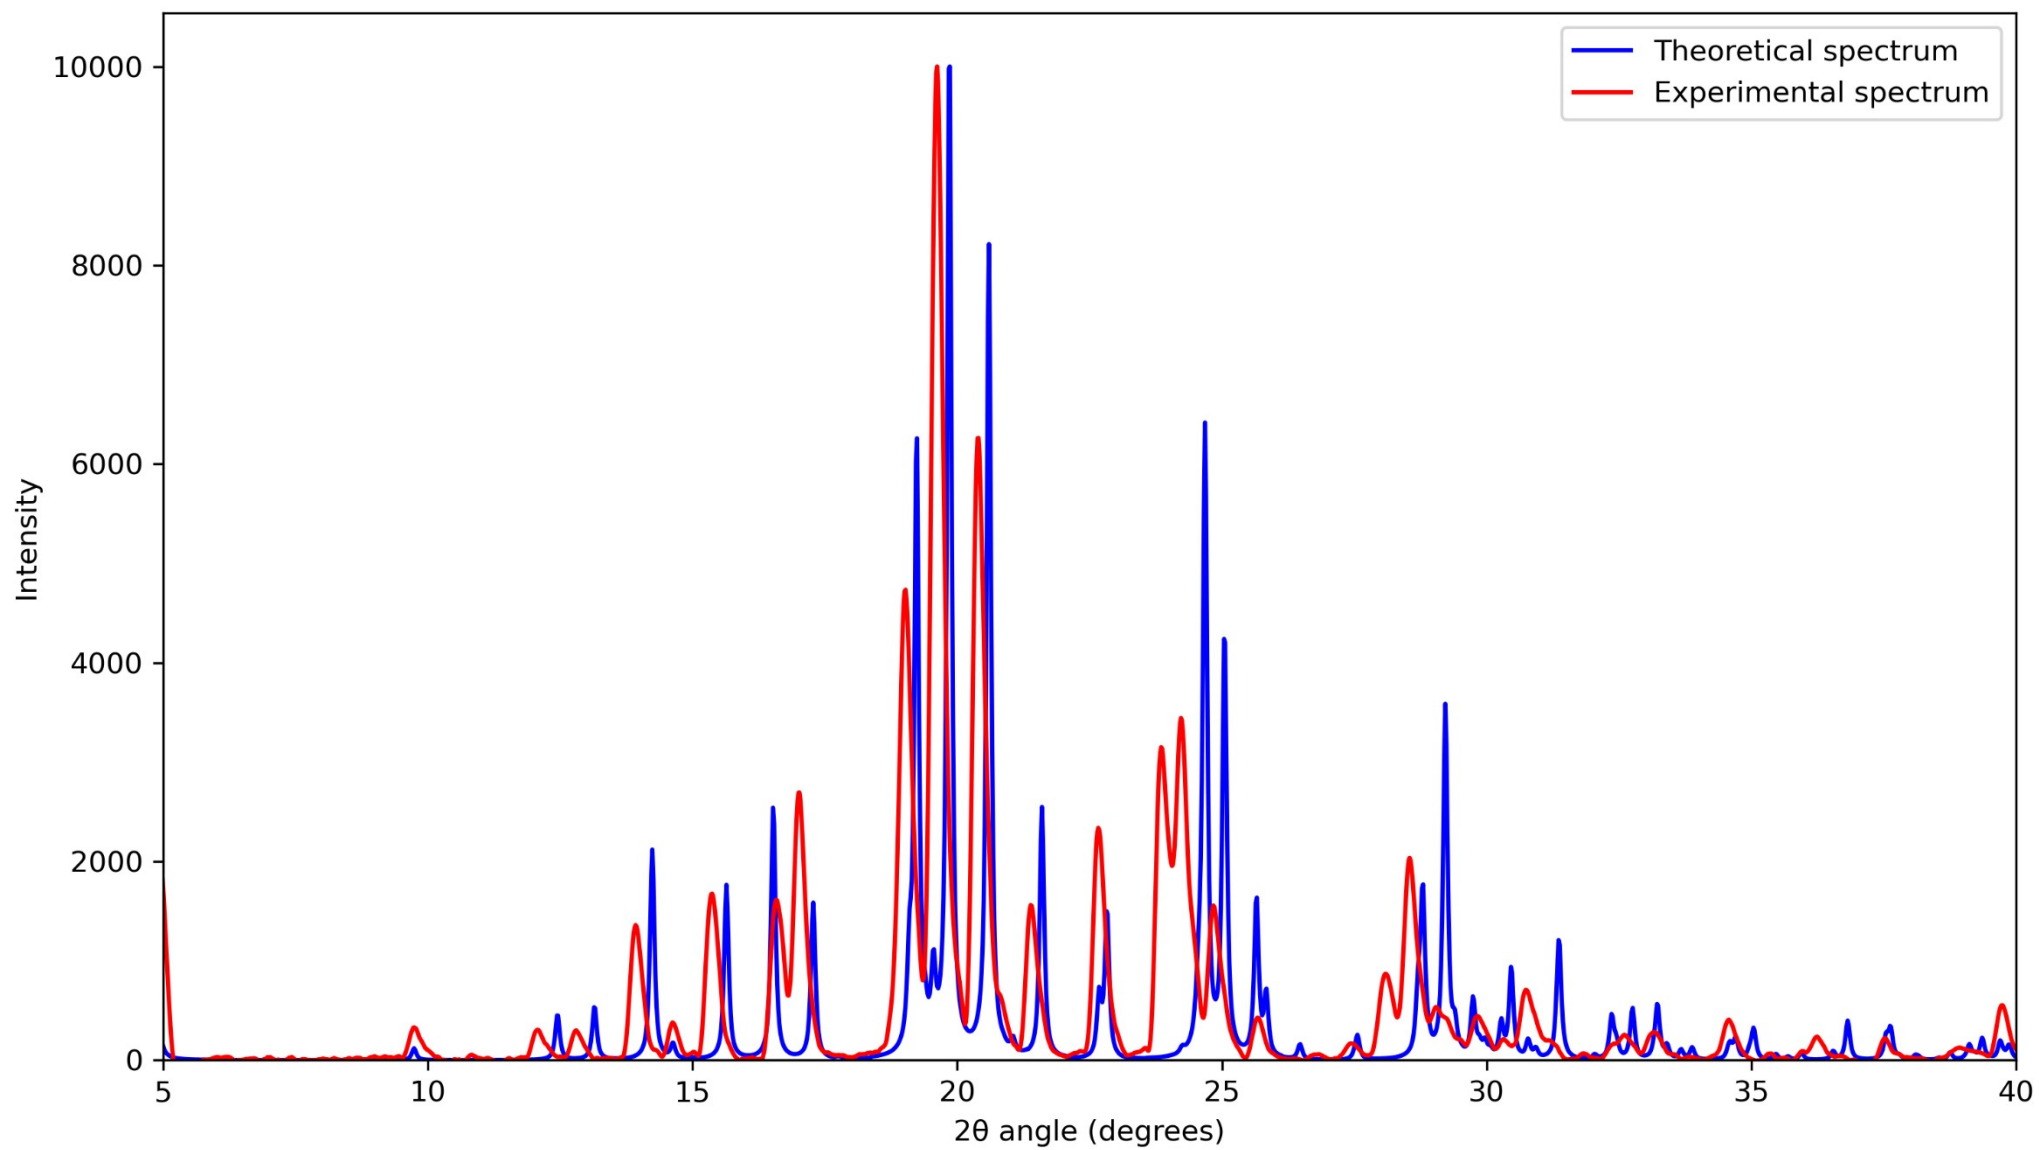

Figure S4. X-ray powder diffraction data of (*E*)-4-(4-((2-(4-methoxyphenyl)hydrazineylidene)methyl)phenyl)morpholine (**4**).

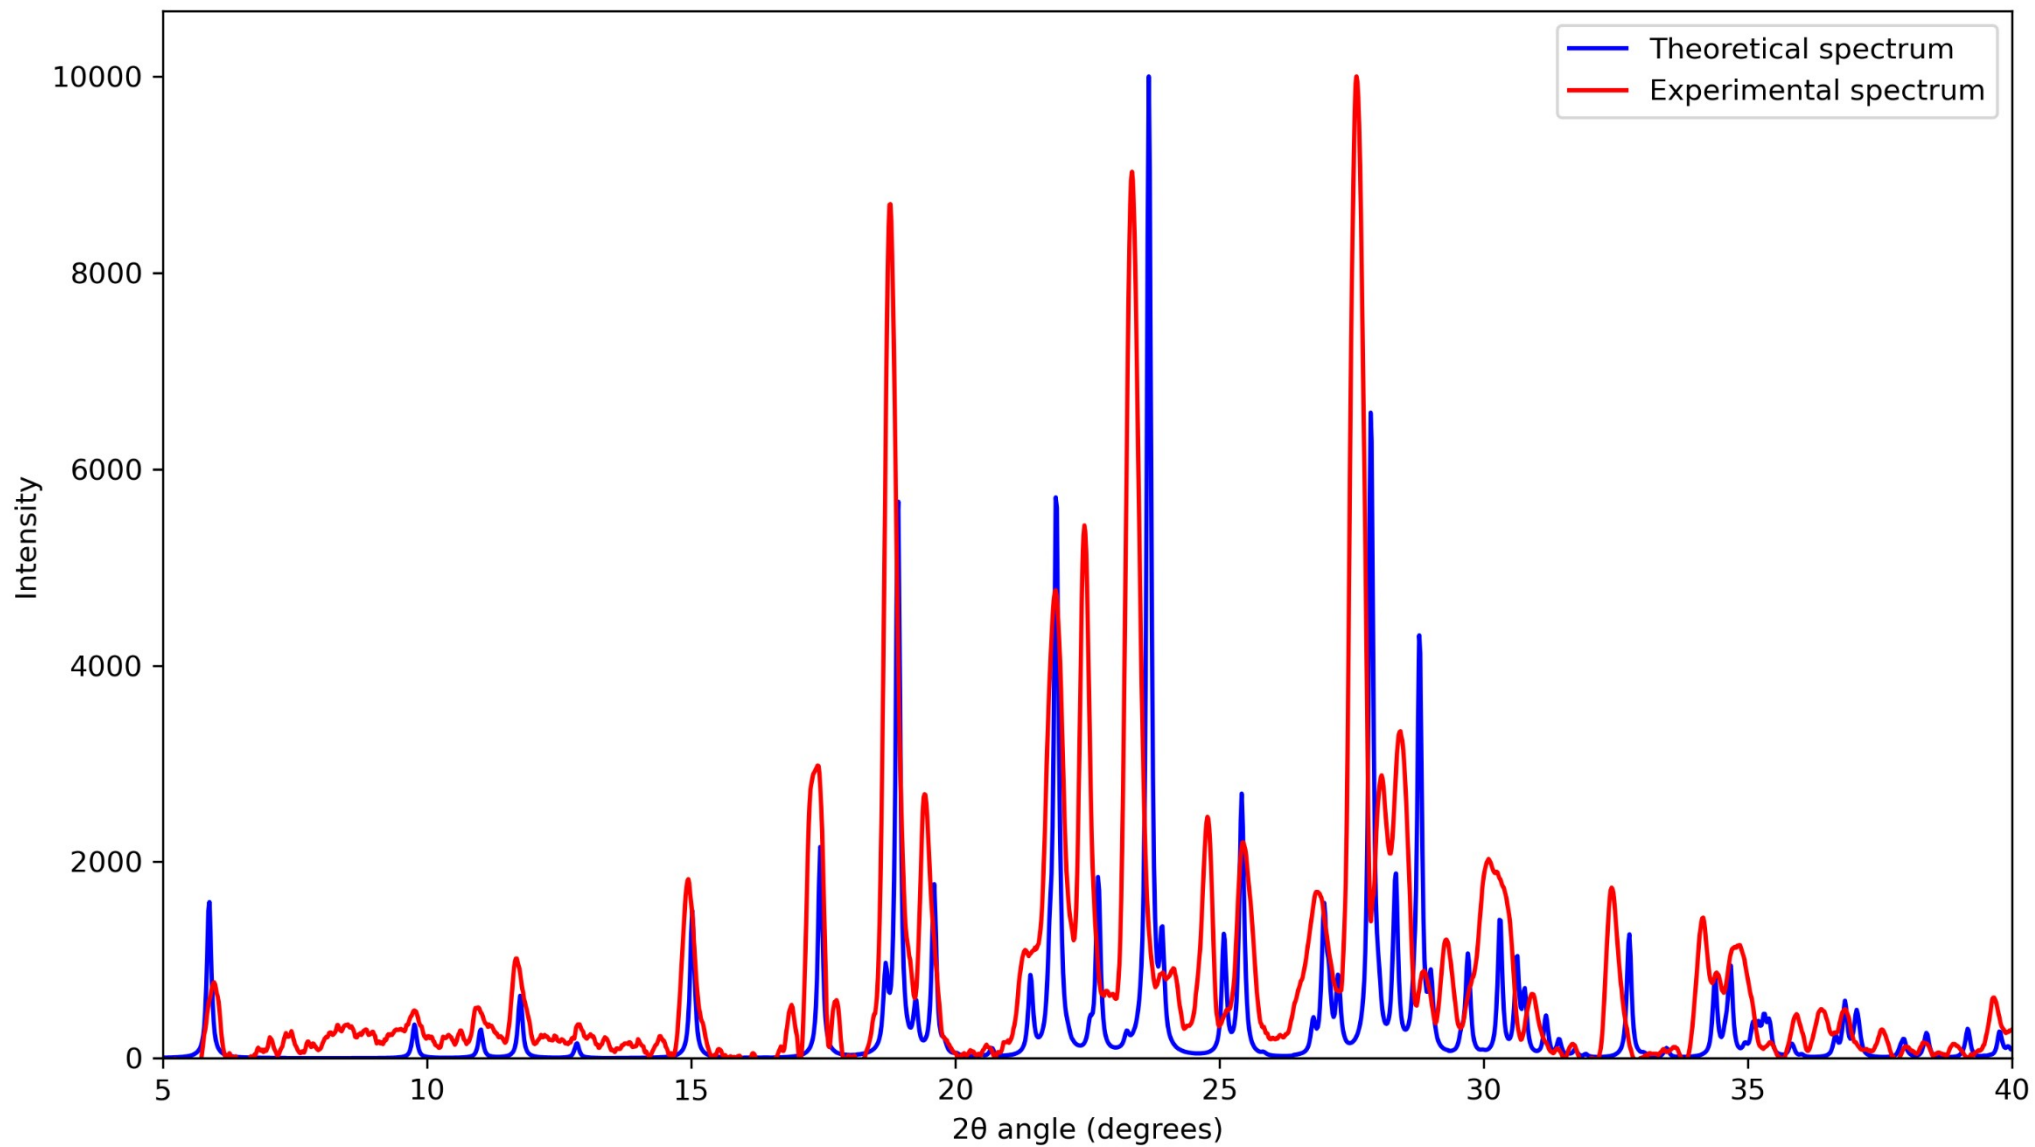

Figure S5. X-ray powder diffraction data of (*E*)-1-(2,4-dichlorobenzylidene)-2-(4-methoxyphenyl)hydrazine (**5**).

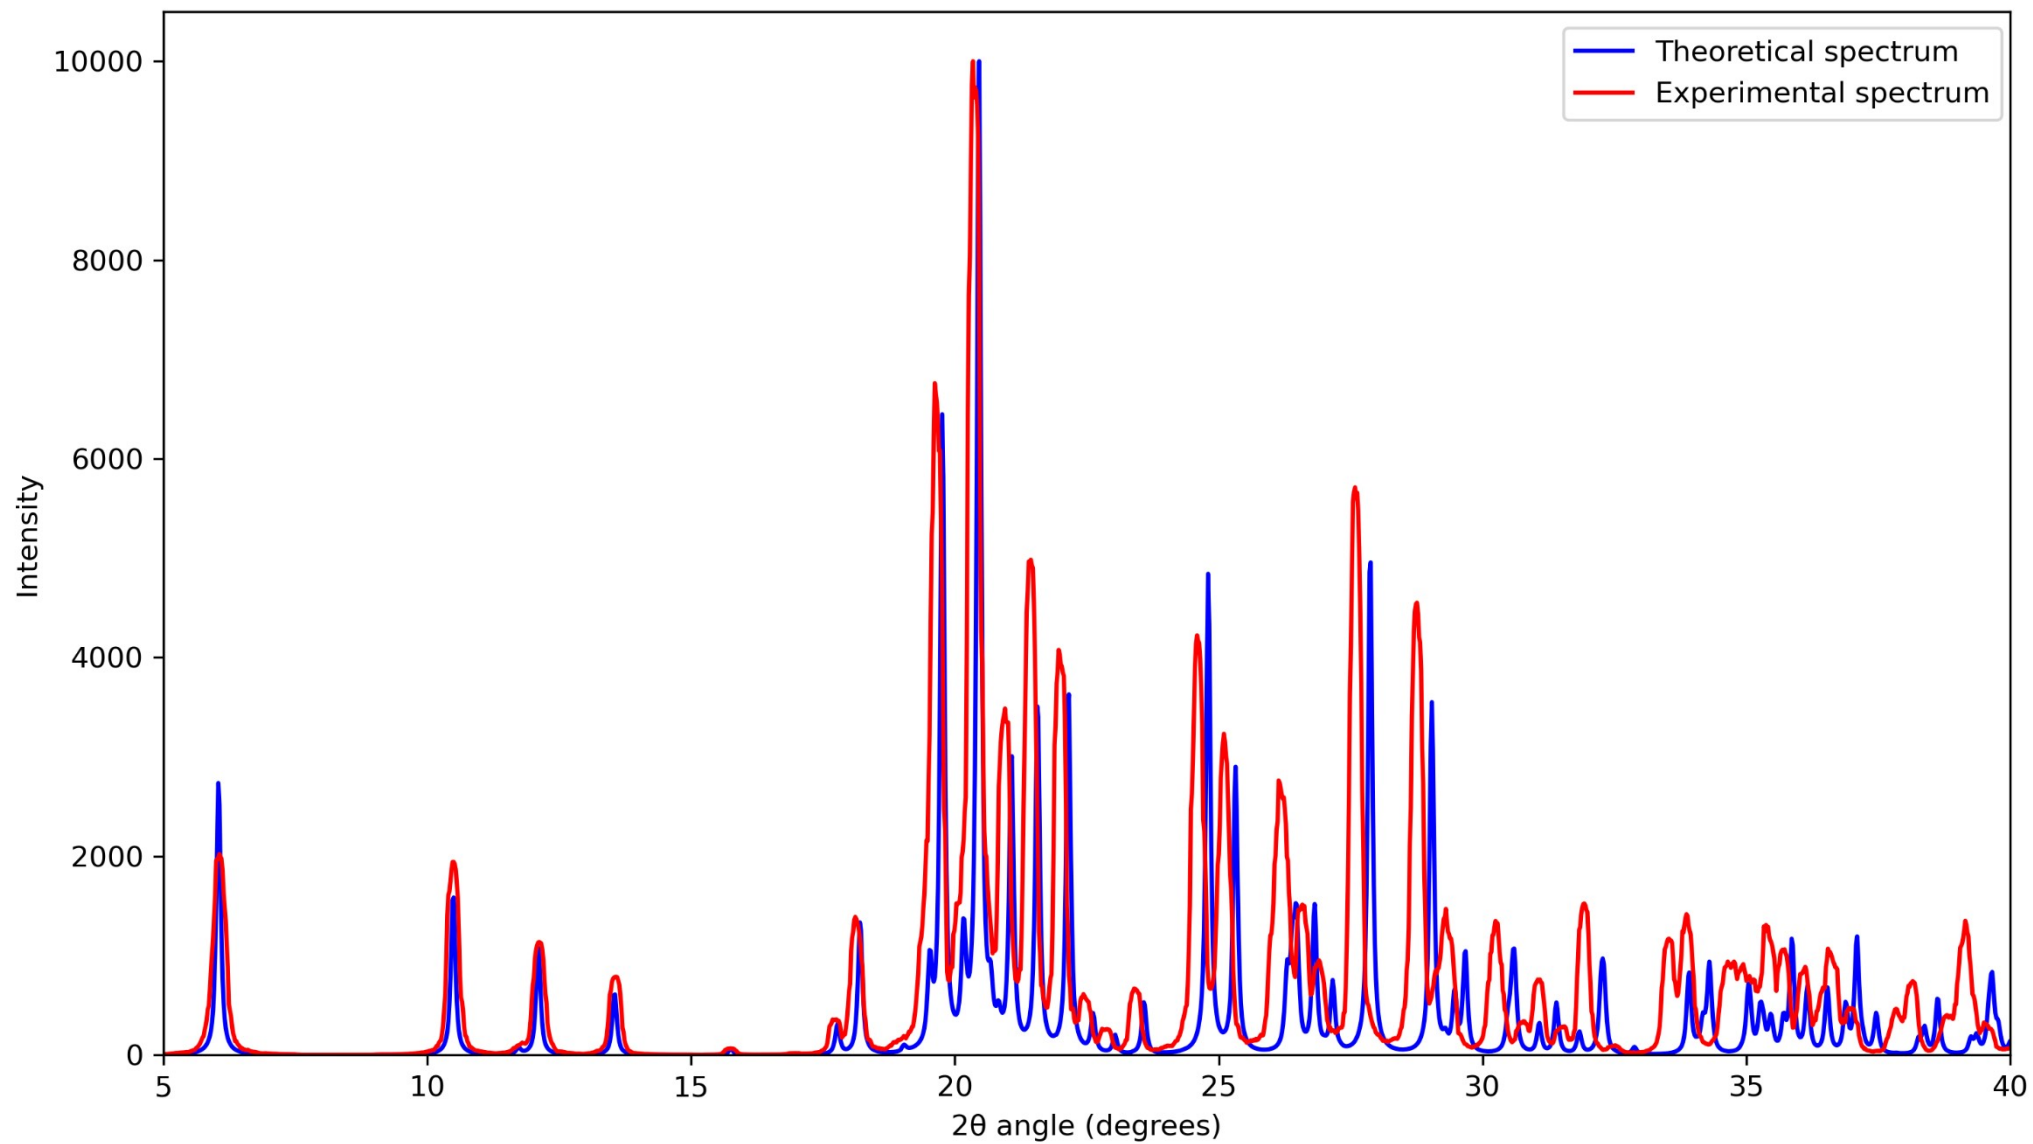

Figure S6. X-ray powder diffraction data of (*E*)-1-(1-(4-bromophenyl)ethylidene)-2-(4-methoxyphenyl)hydrazine (**6**).

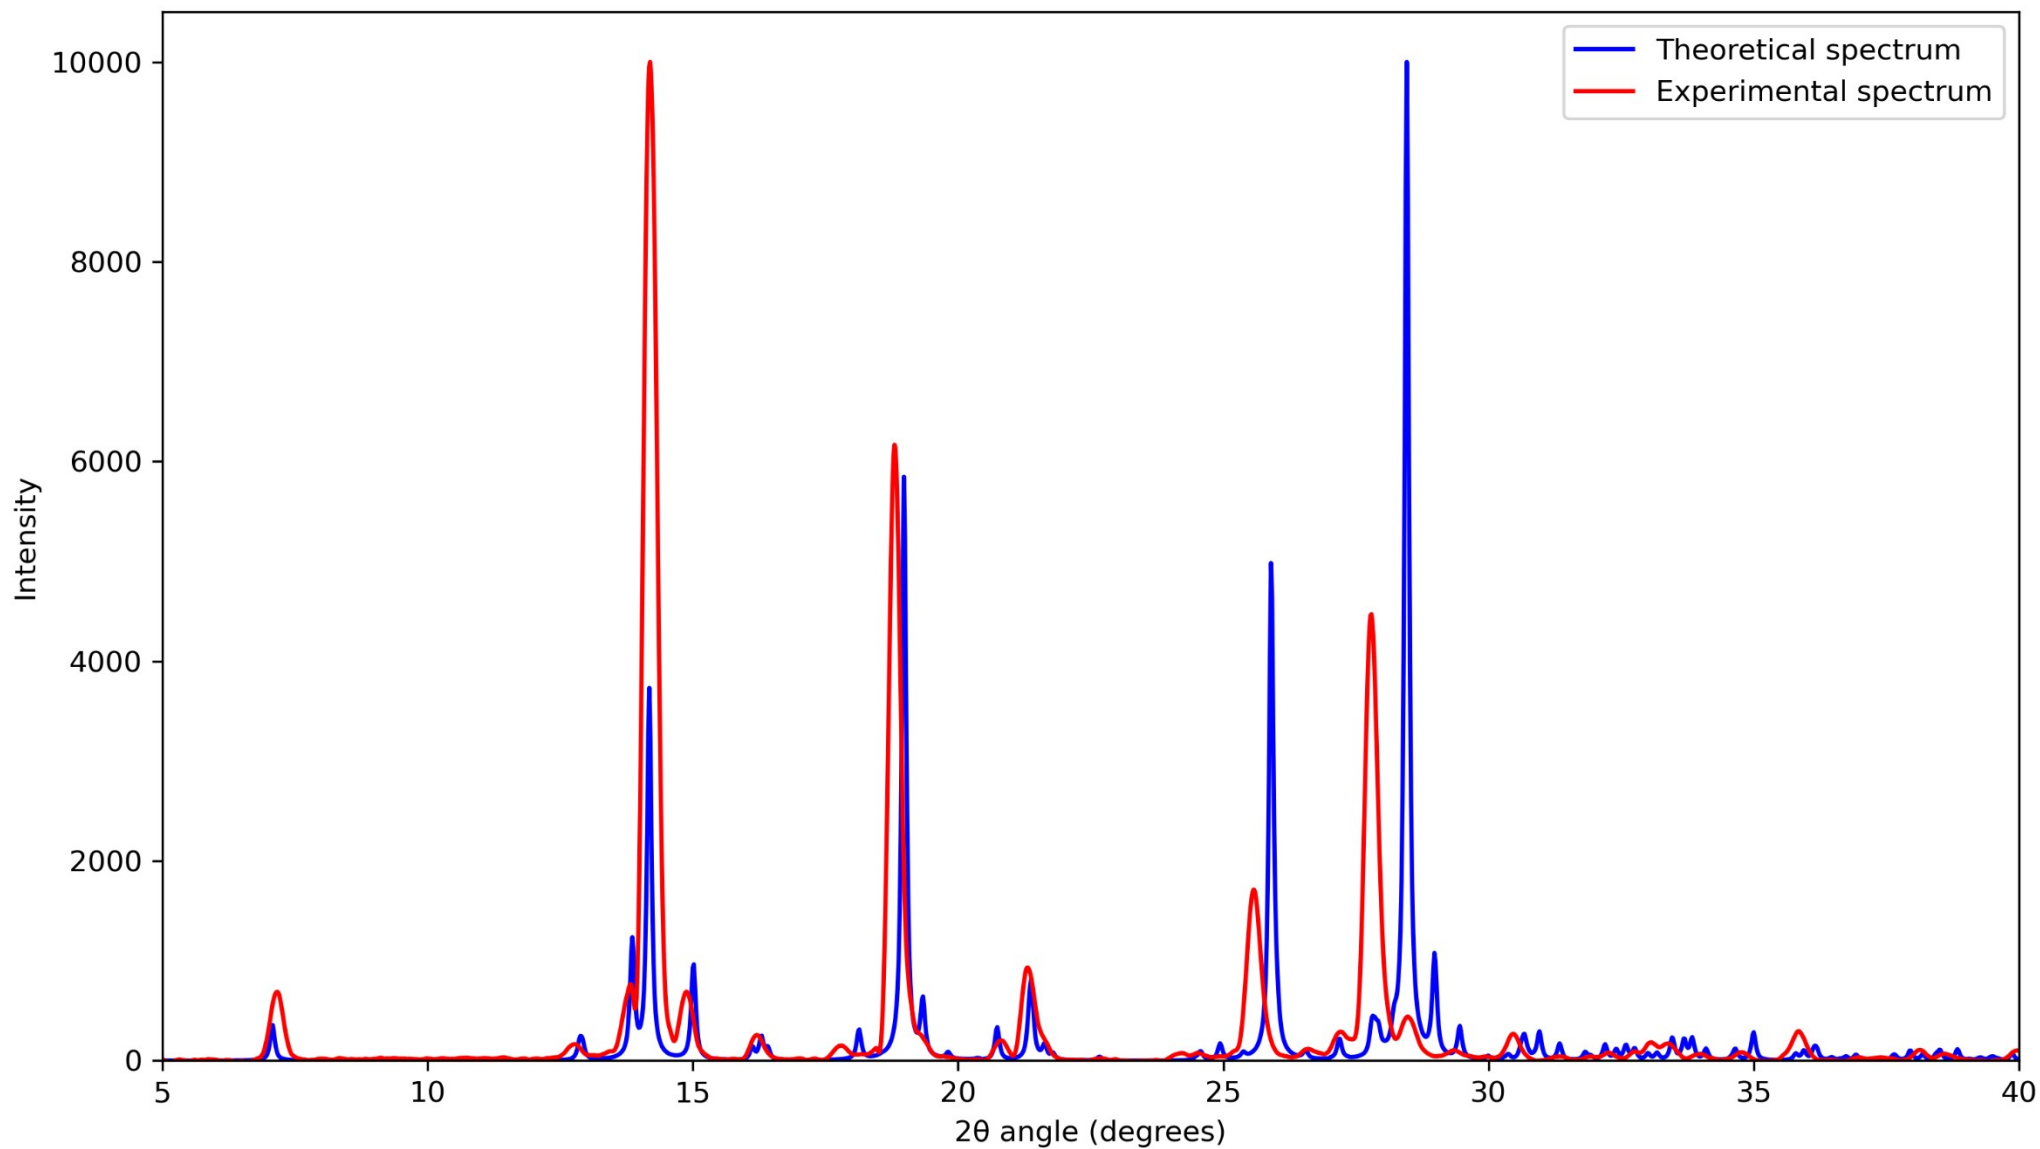

Figure S7. X-ray powder diffraction data of (*E*)-1-(4-methoxyphenyl)-2-((5-nitrofur-2-yl)methylene)hydrazine (**7**).



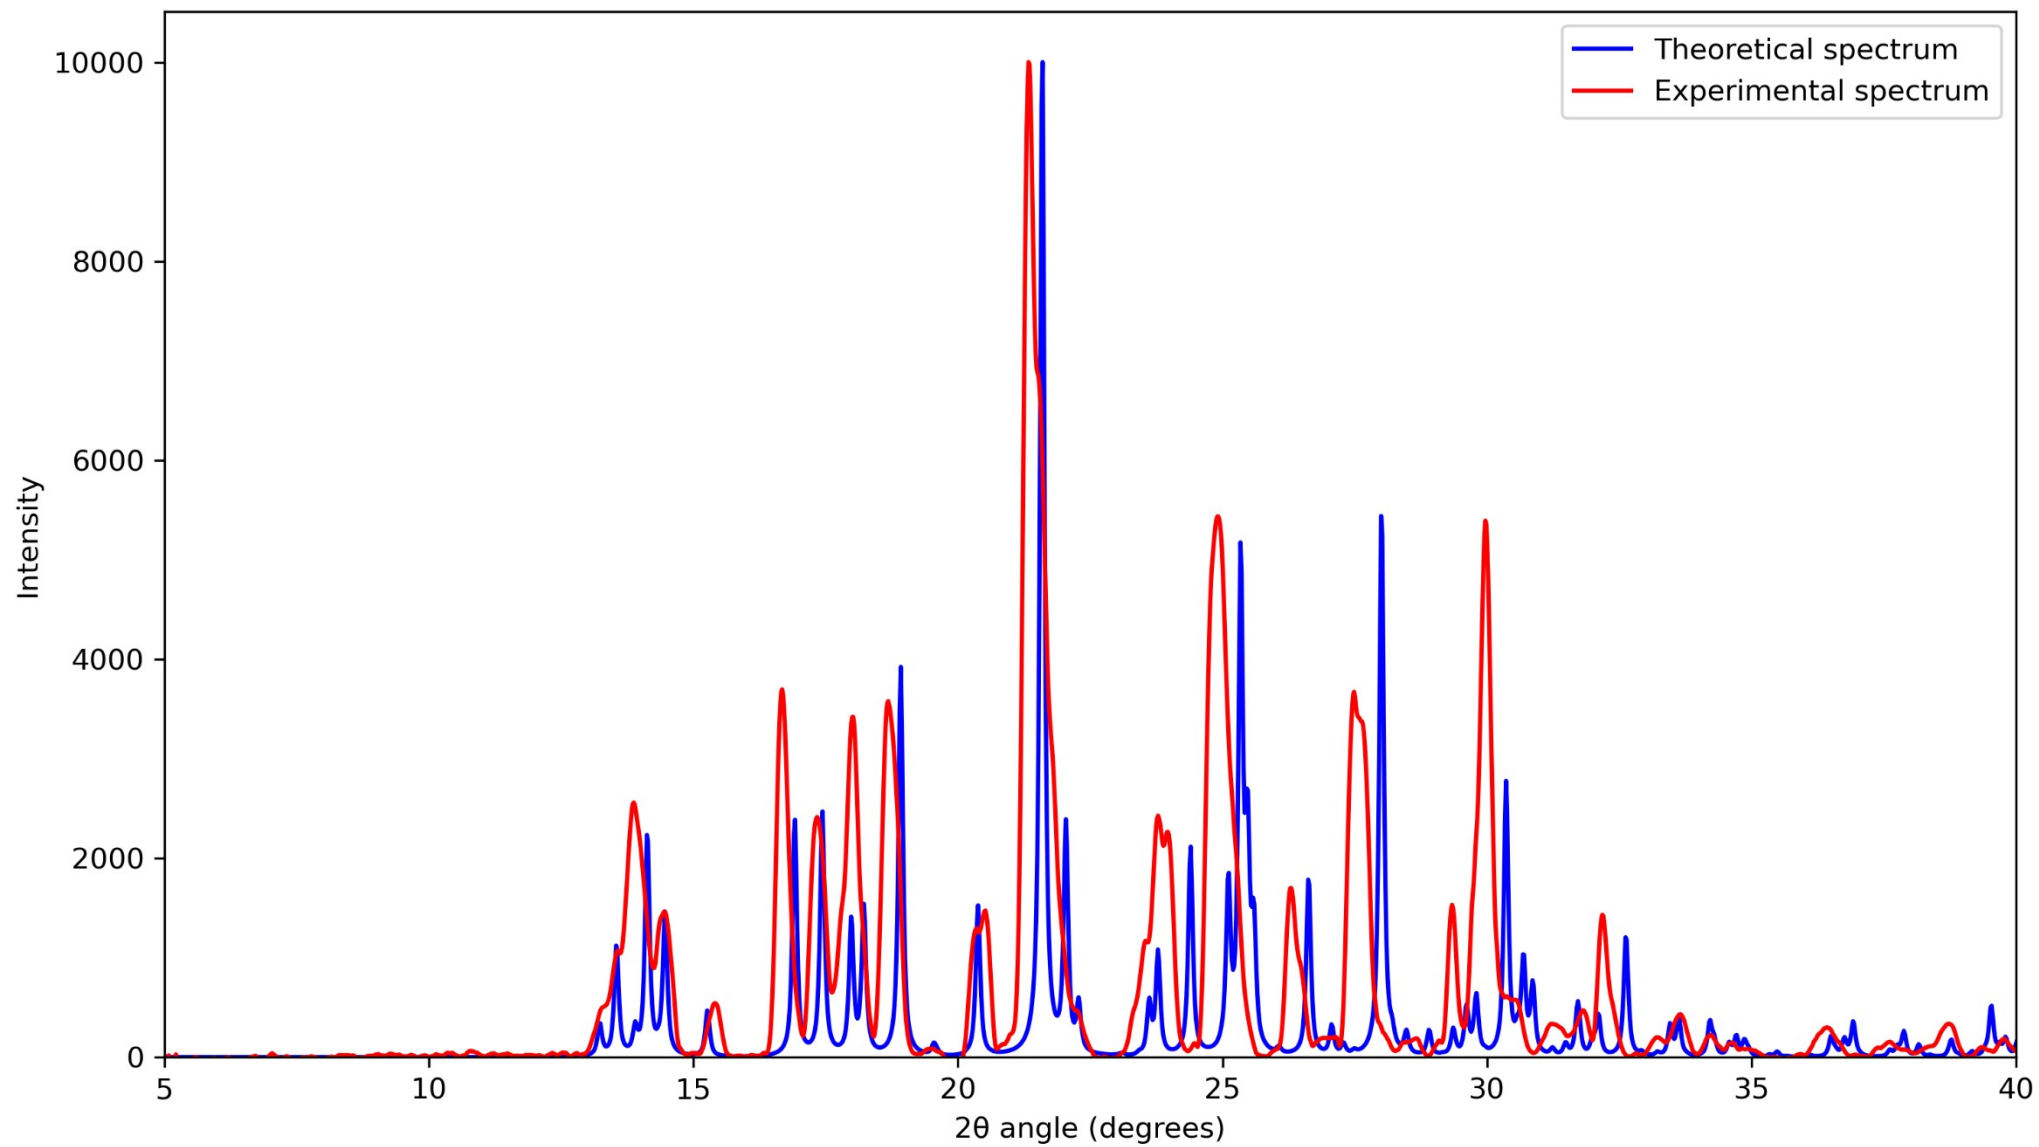

Figure S8. X-ray powder diffraction data of (*E*)-1-(4-methoxyphenyl)-2-(4-nitrobenzylidene)hydrazine (**8**).

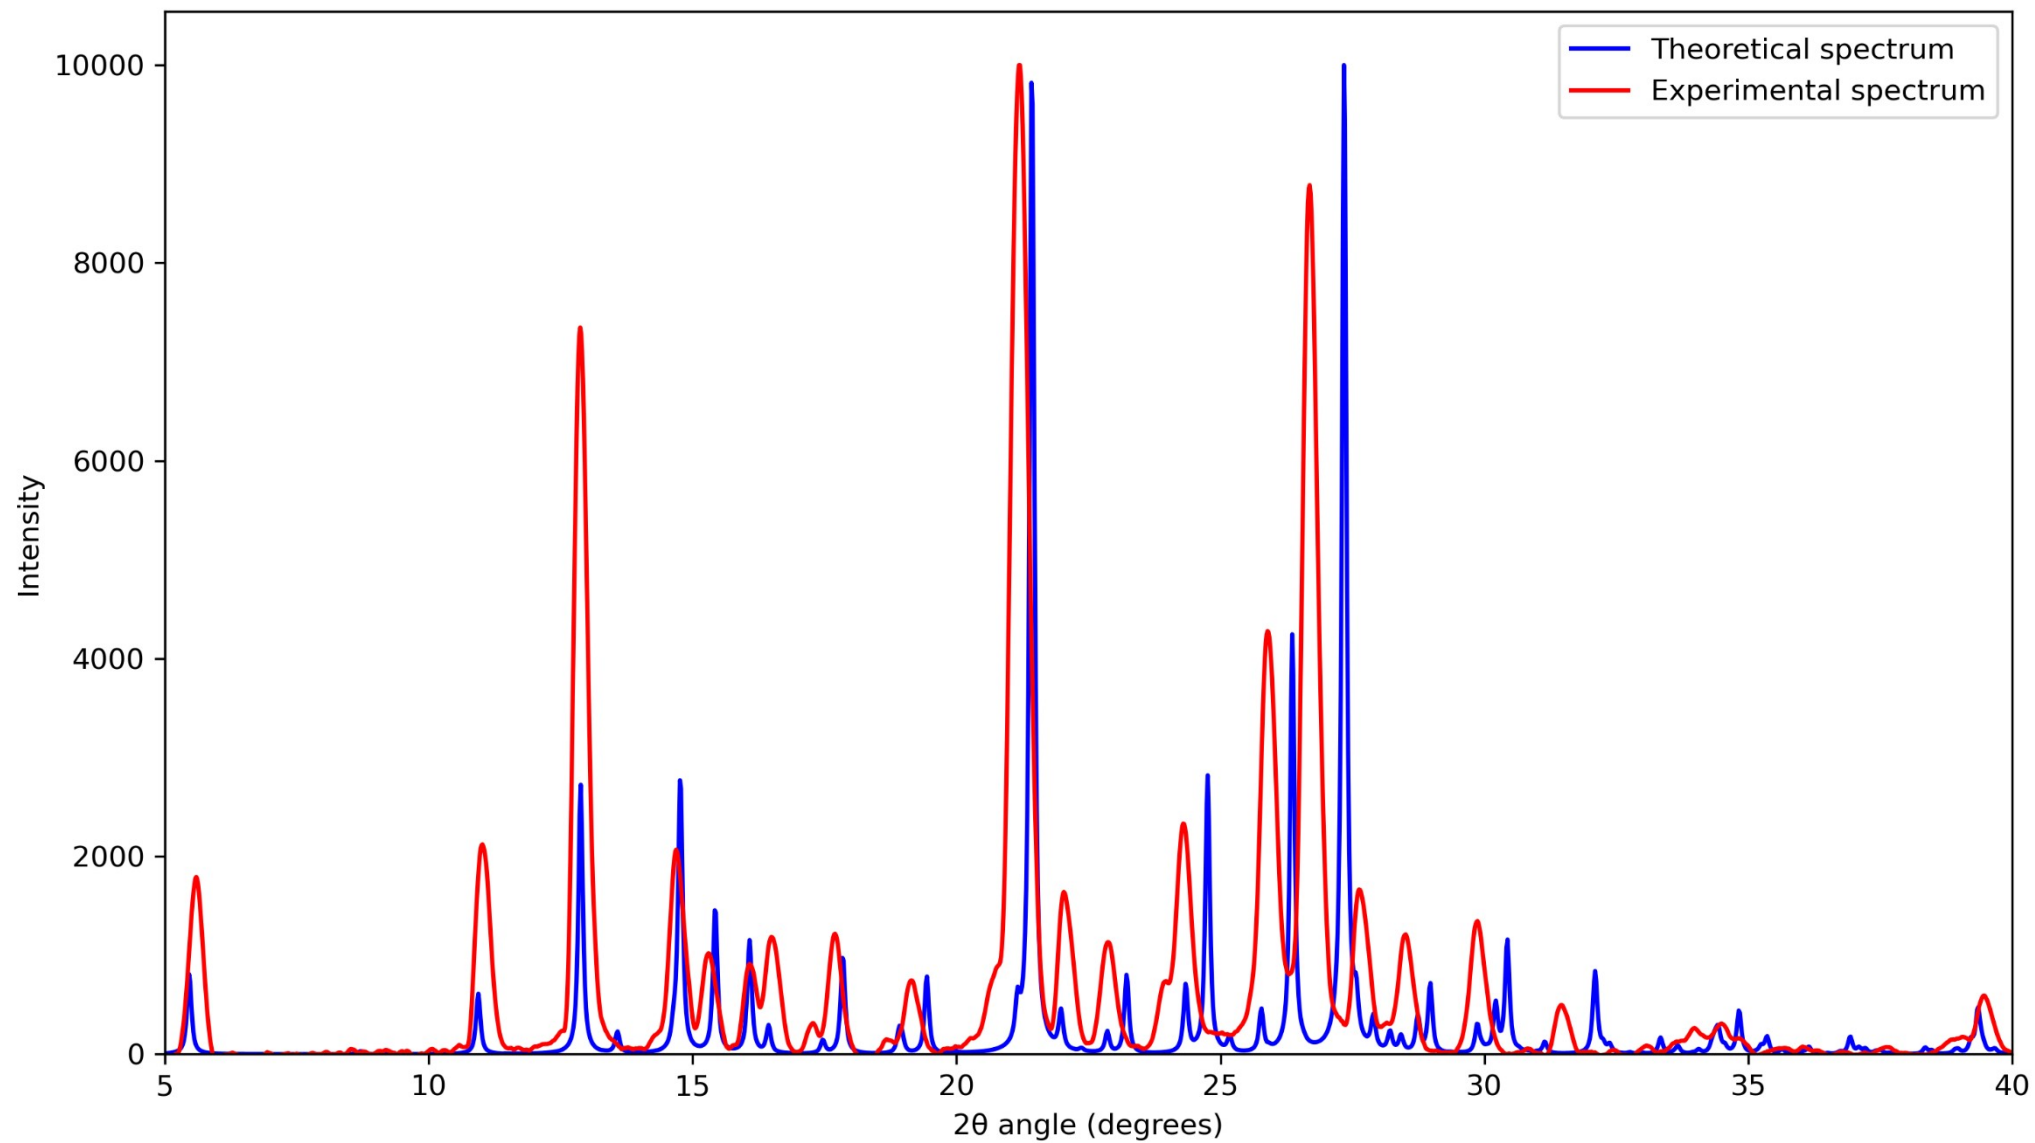

Figure S9. X-ray powder diffraction data of (*E*)-1-(4-methoxyphenyl)-2-(3-(4-nitrophenyl)propylidene)hydrazine (**9**).

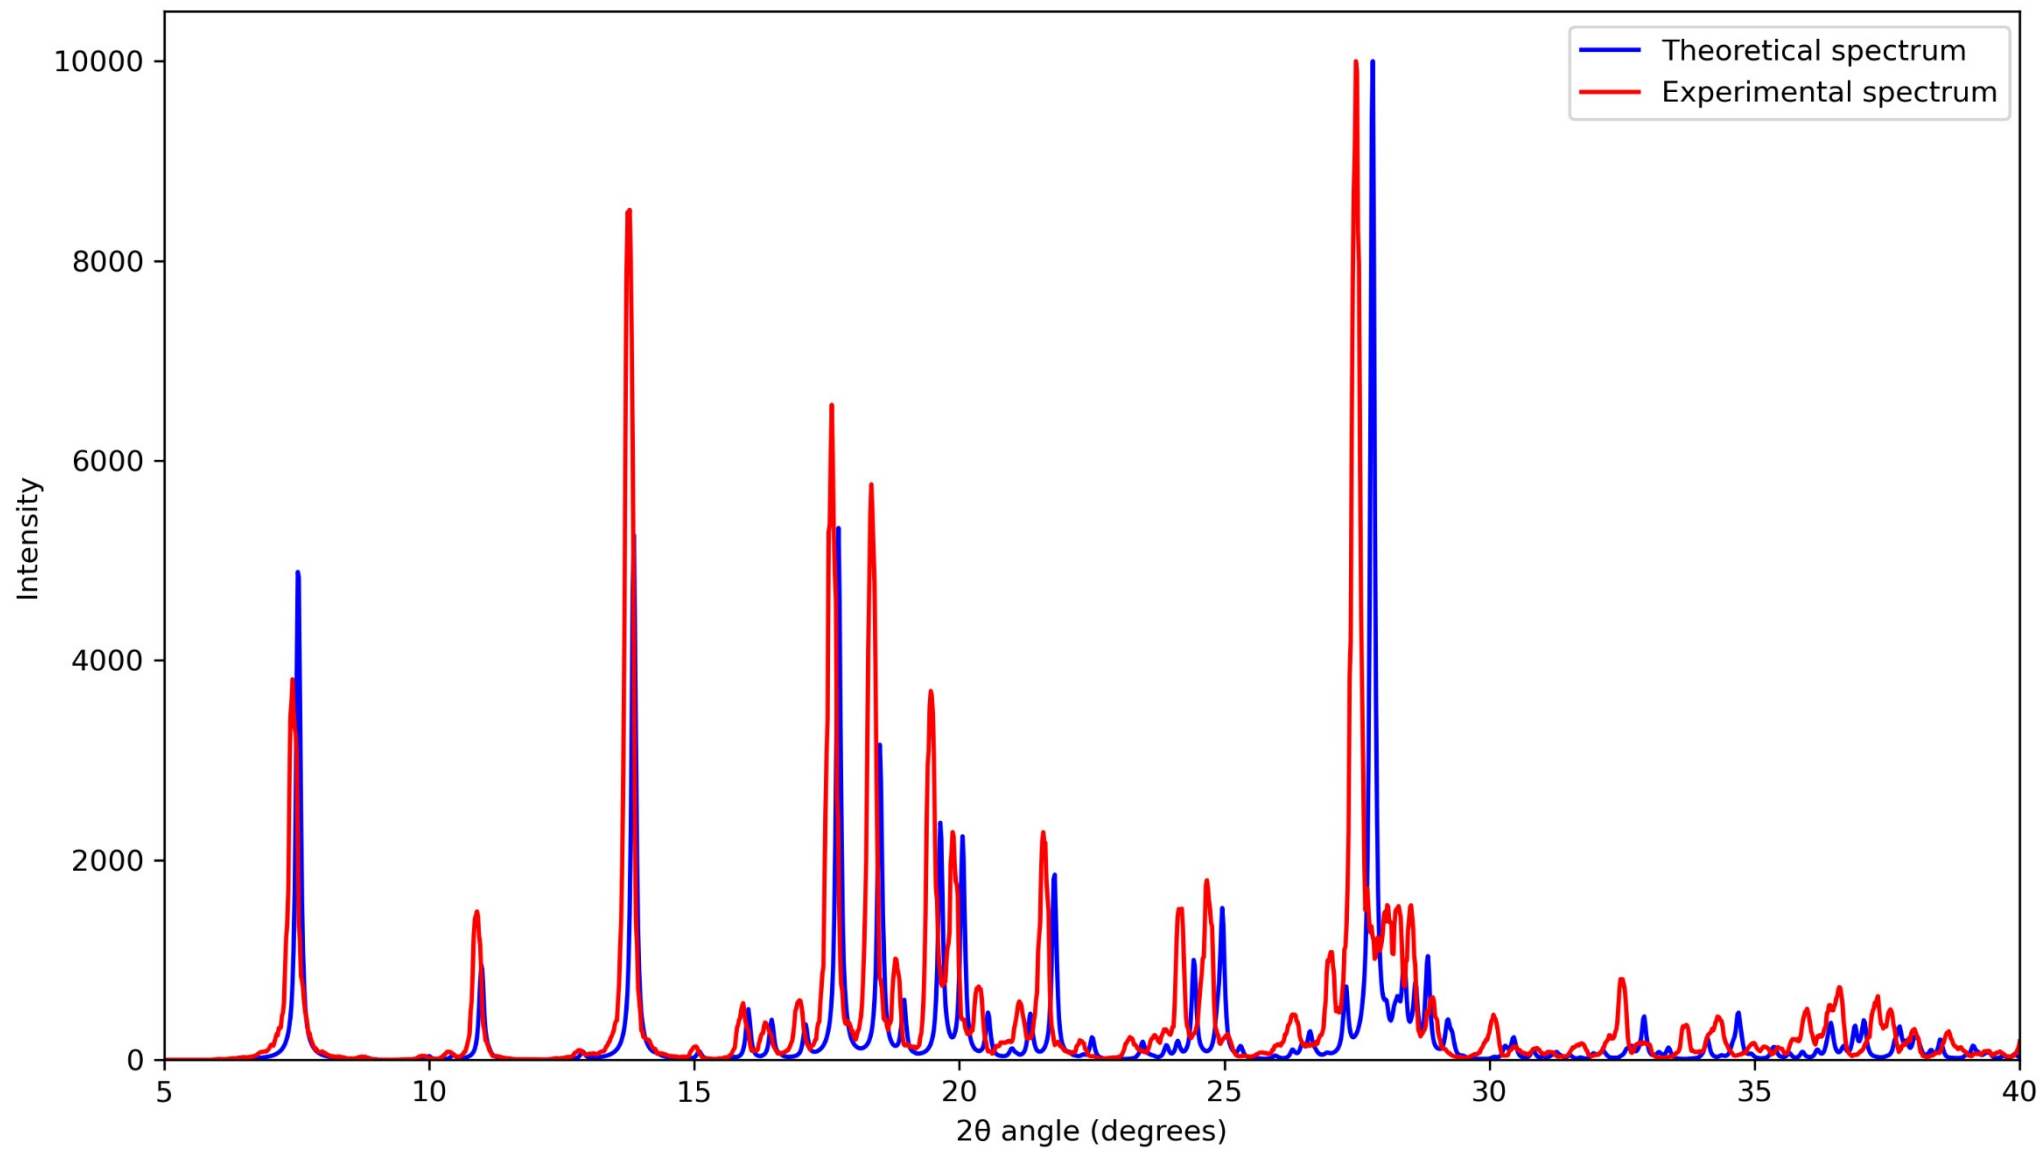

Figure S10. X-ray powder diffraction data of (*E*)-1-(4-methoxyphenyl)-2-((5-nitrothiophen-2-yl)methylene)hydrazine (**10**).

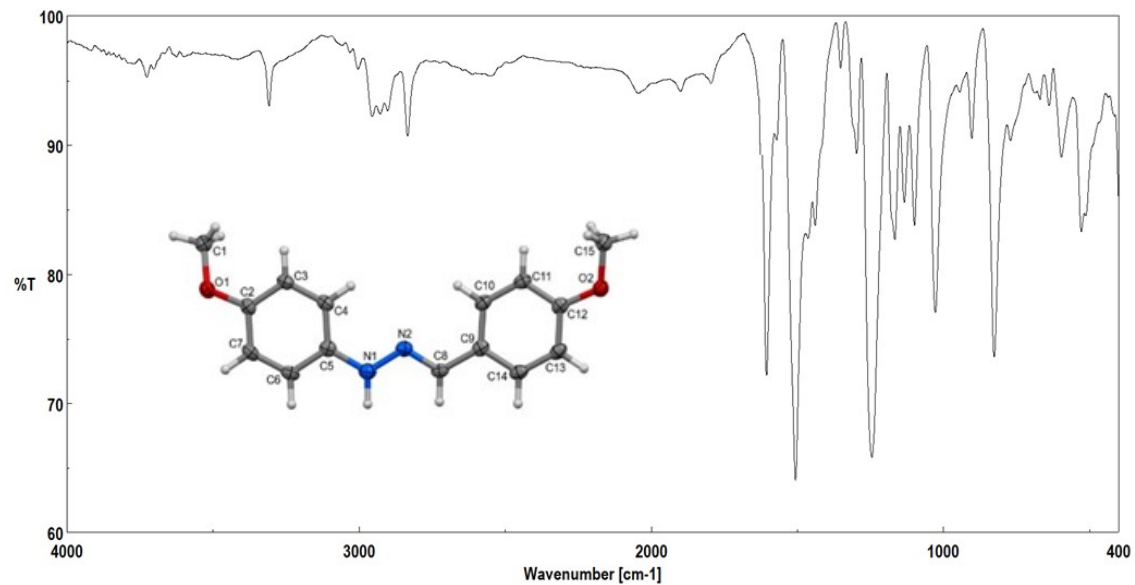

Figure S11. IR spectrum of (*E*)-1-(4-methoxybenzylidene)-2-(4-methoxyphenyl)hydrazine (**1**).

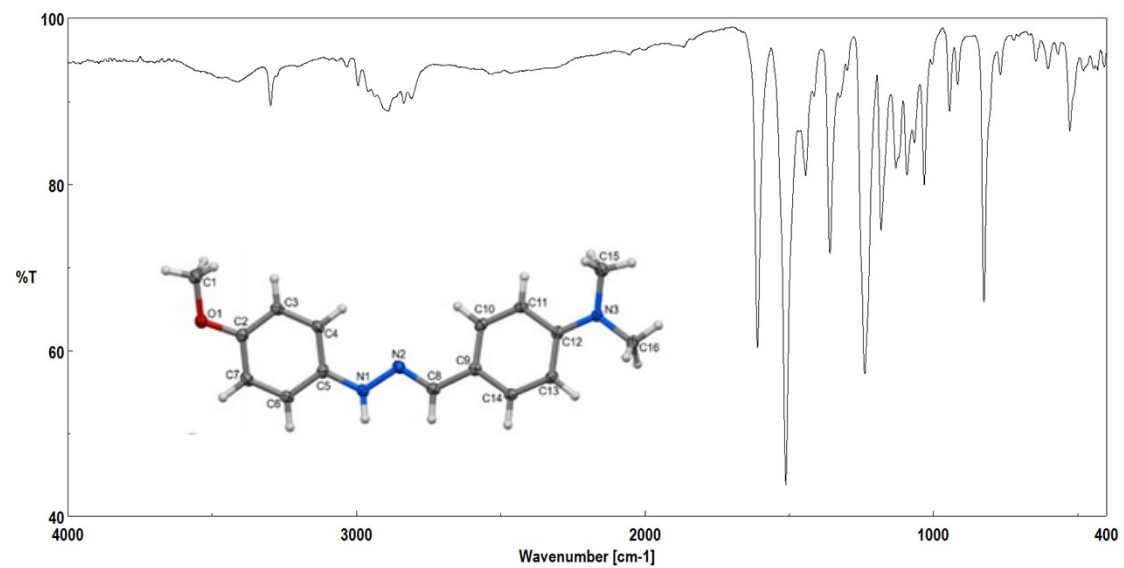

Figure S12. IR spectrum of (*E*)-4-((2-(4-methoxyphenyl)hydrazineylidene)methyl)-*N,N*-dimethylaniline (**2**).

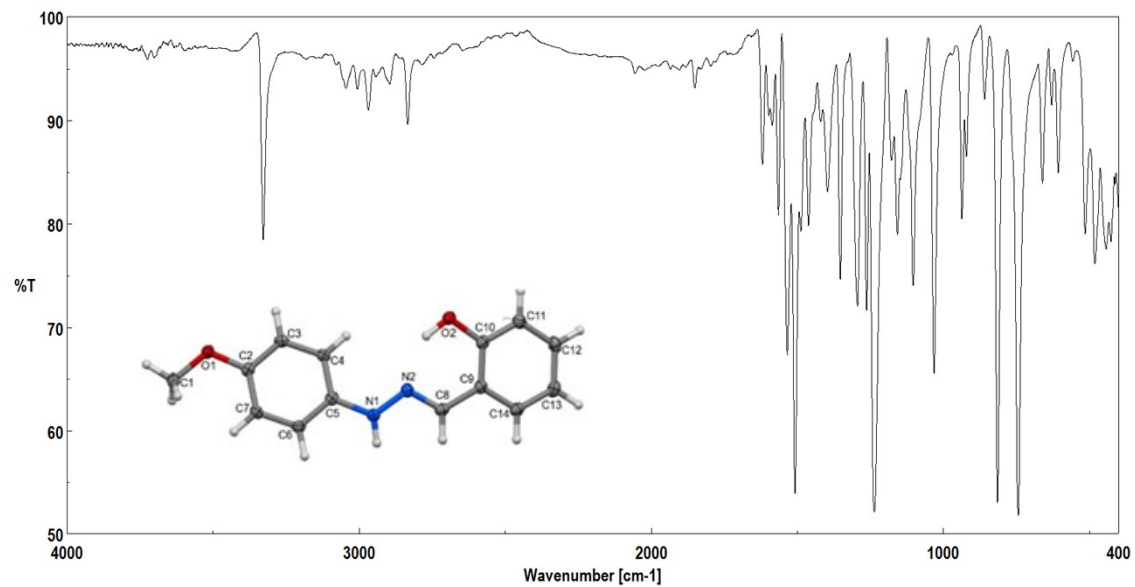

Figure S13. IR spectrum of (*E*)-2-((2-(4-methoxyphenyl)hydrazineylidene)methyl)phenol (**3**).

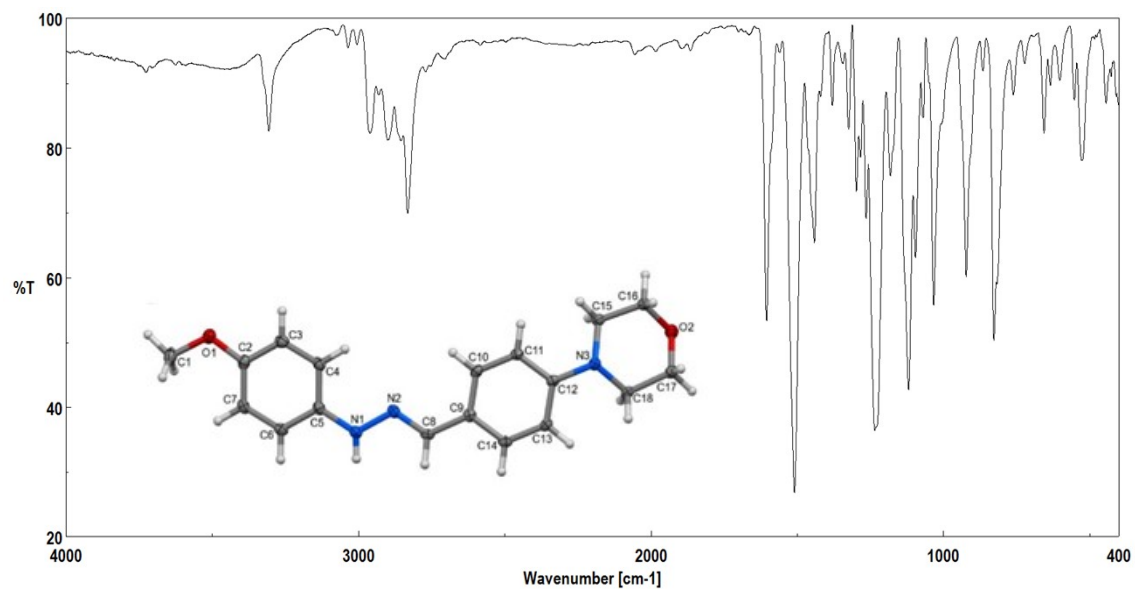

Figure S14. IR spectrum of (*E*)-4-(4-((2-(4-methoxyphenyl)hydrazineylidene)methyl)phenyl)morpholine (**4**).

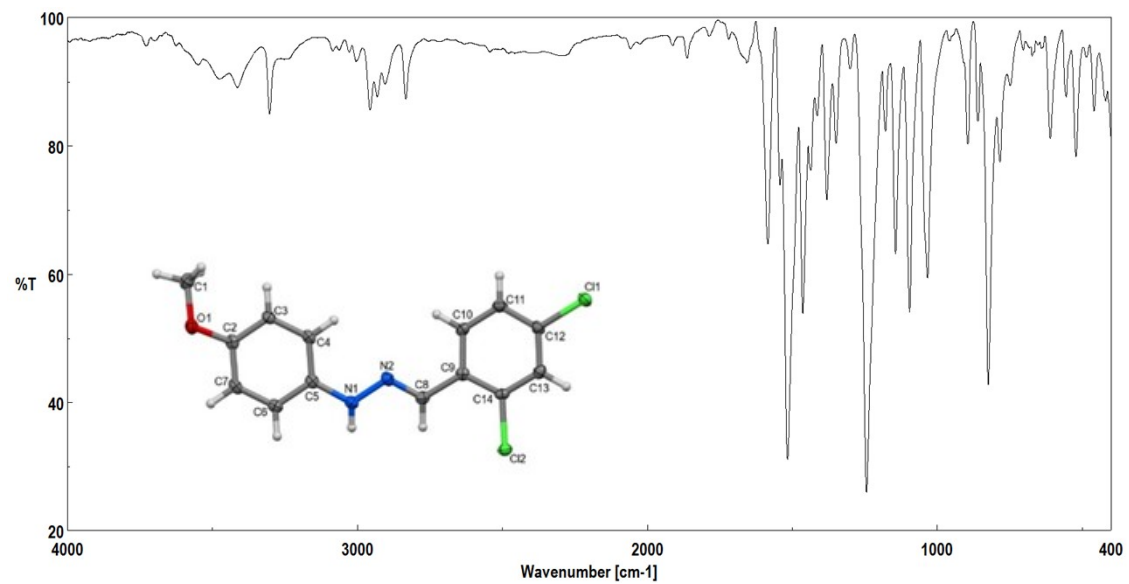

Figure S15. IR spectrum of (*E*)-1-(2,4-dichlorobenzylidene)-2-(4-methoxyphenyl)hydrazine (**5**).

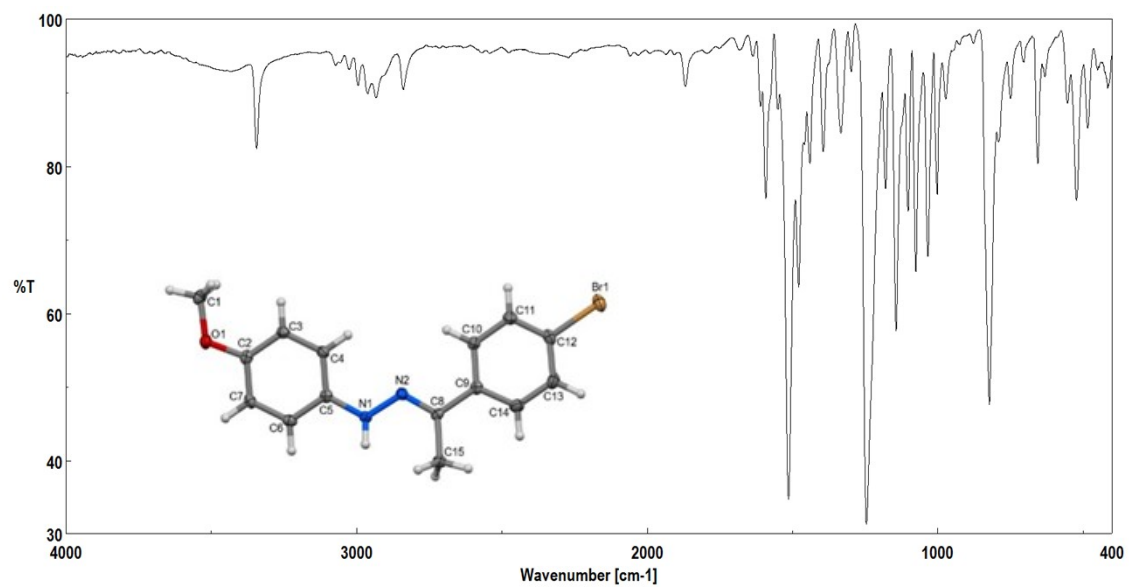

Figure S16. IR spectrum of (*E*)-1-(1-(4-bromophenyl)ethylidene)-2-(4-methoxyphenyl)hydrazine (**6**).

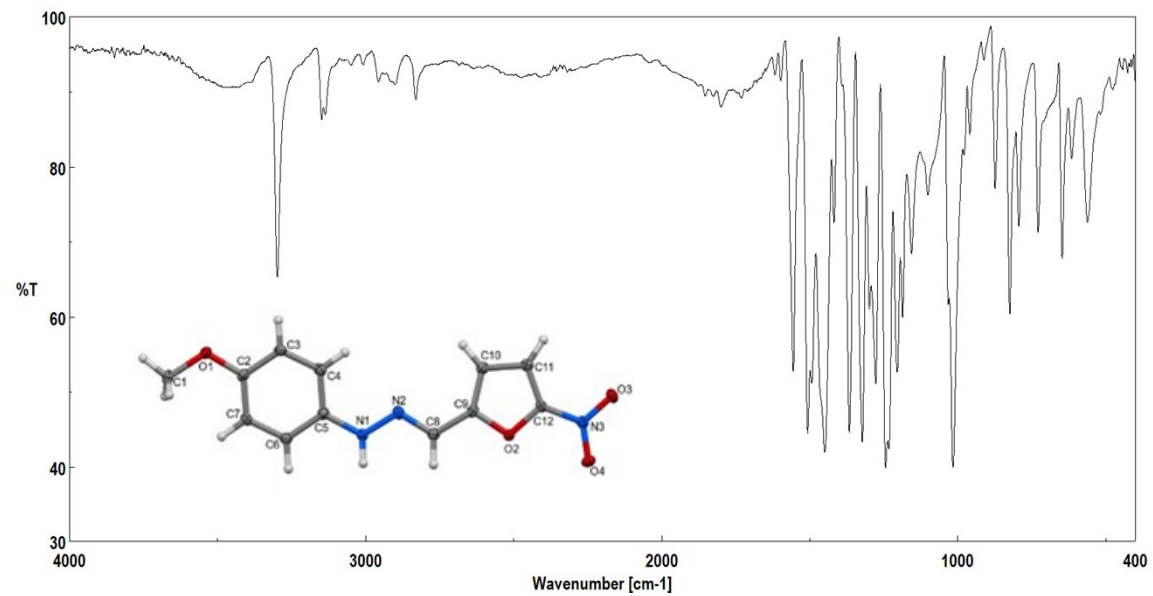

Figure S17. IR spectrum of (*E*)-1-(4-methoxyphenyl)-2-((5-nitrofuran-2-yl)methylene)hydrazine (**7**).

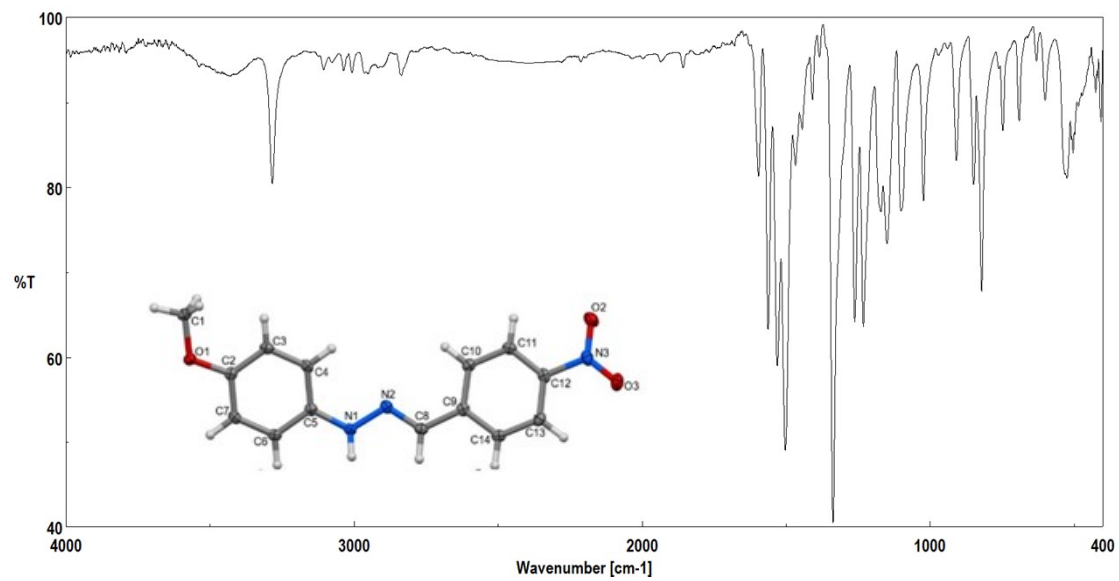

Figure S18. IR spectrum of (*E*)-1-(4-methoxyphenyl)-2-(4-nitrobenzylidene)hydrazine (**8**).

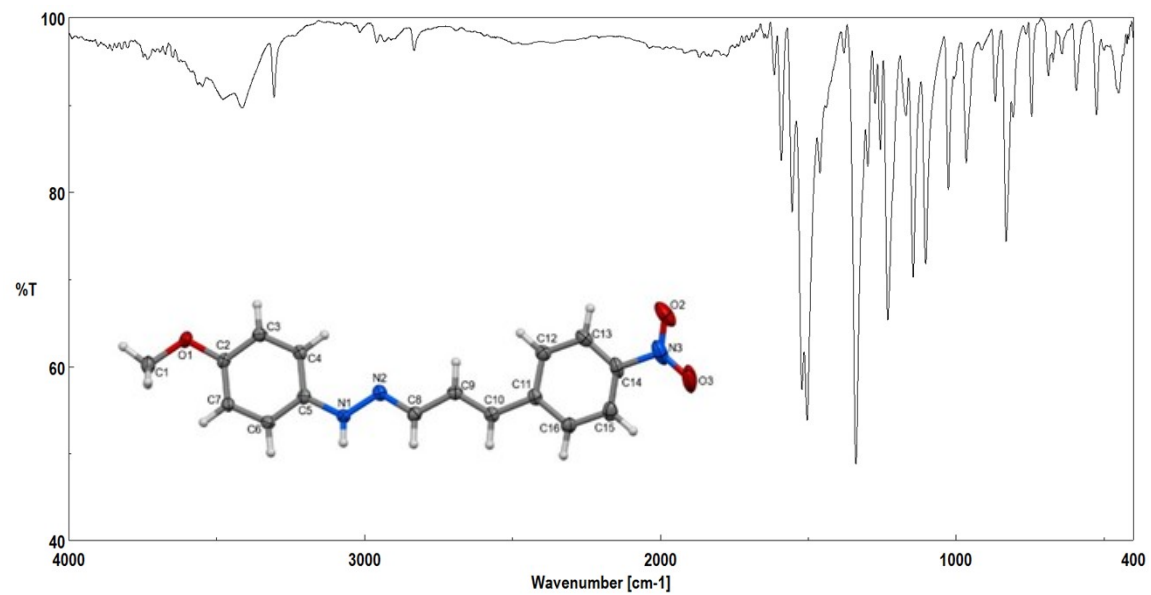

Figure S19. IR spectrum of (*E*)-1-(4-methoxyphenyl)-2-(3-(4-nitrophenyl)propylidene)hydrazine (**9**).

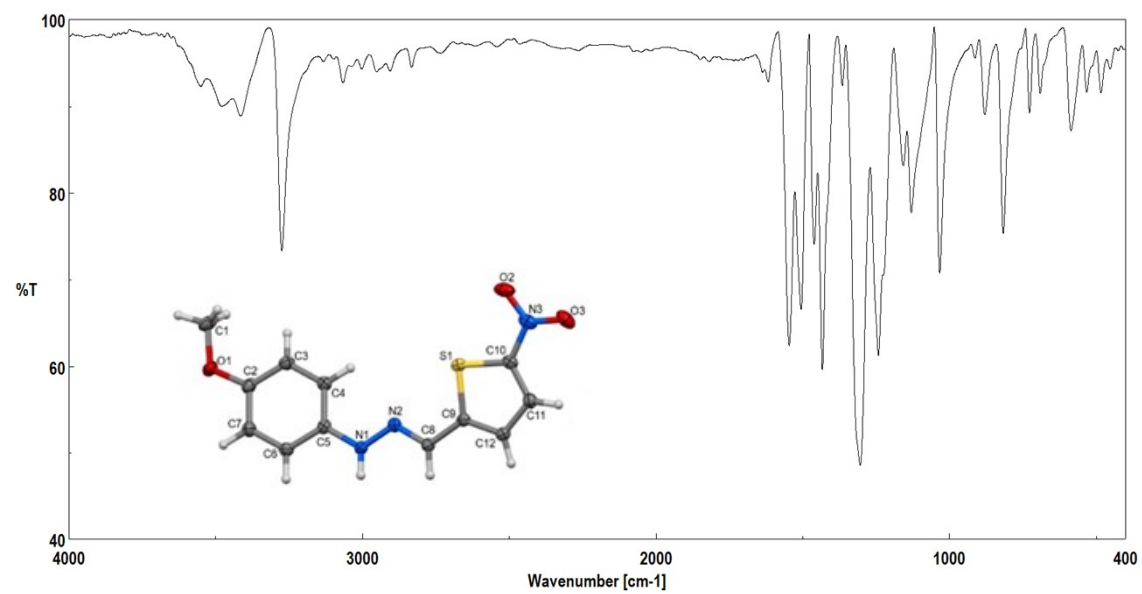

Figure S20. IR spectrum of (*E*)-1-(4-methoxyphenyl)-2-((5-nitrothiophen-2-yl)methylene)hydrazine (**10**).



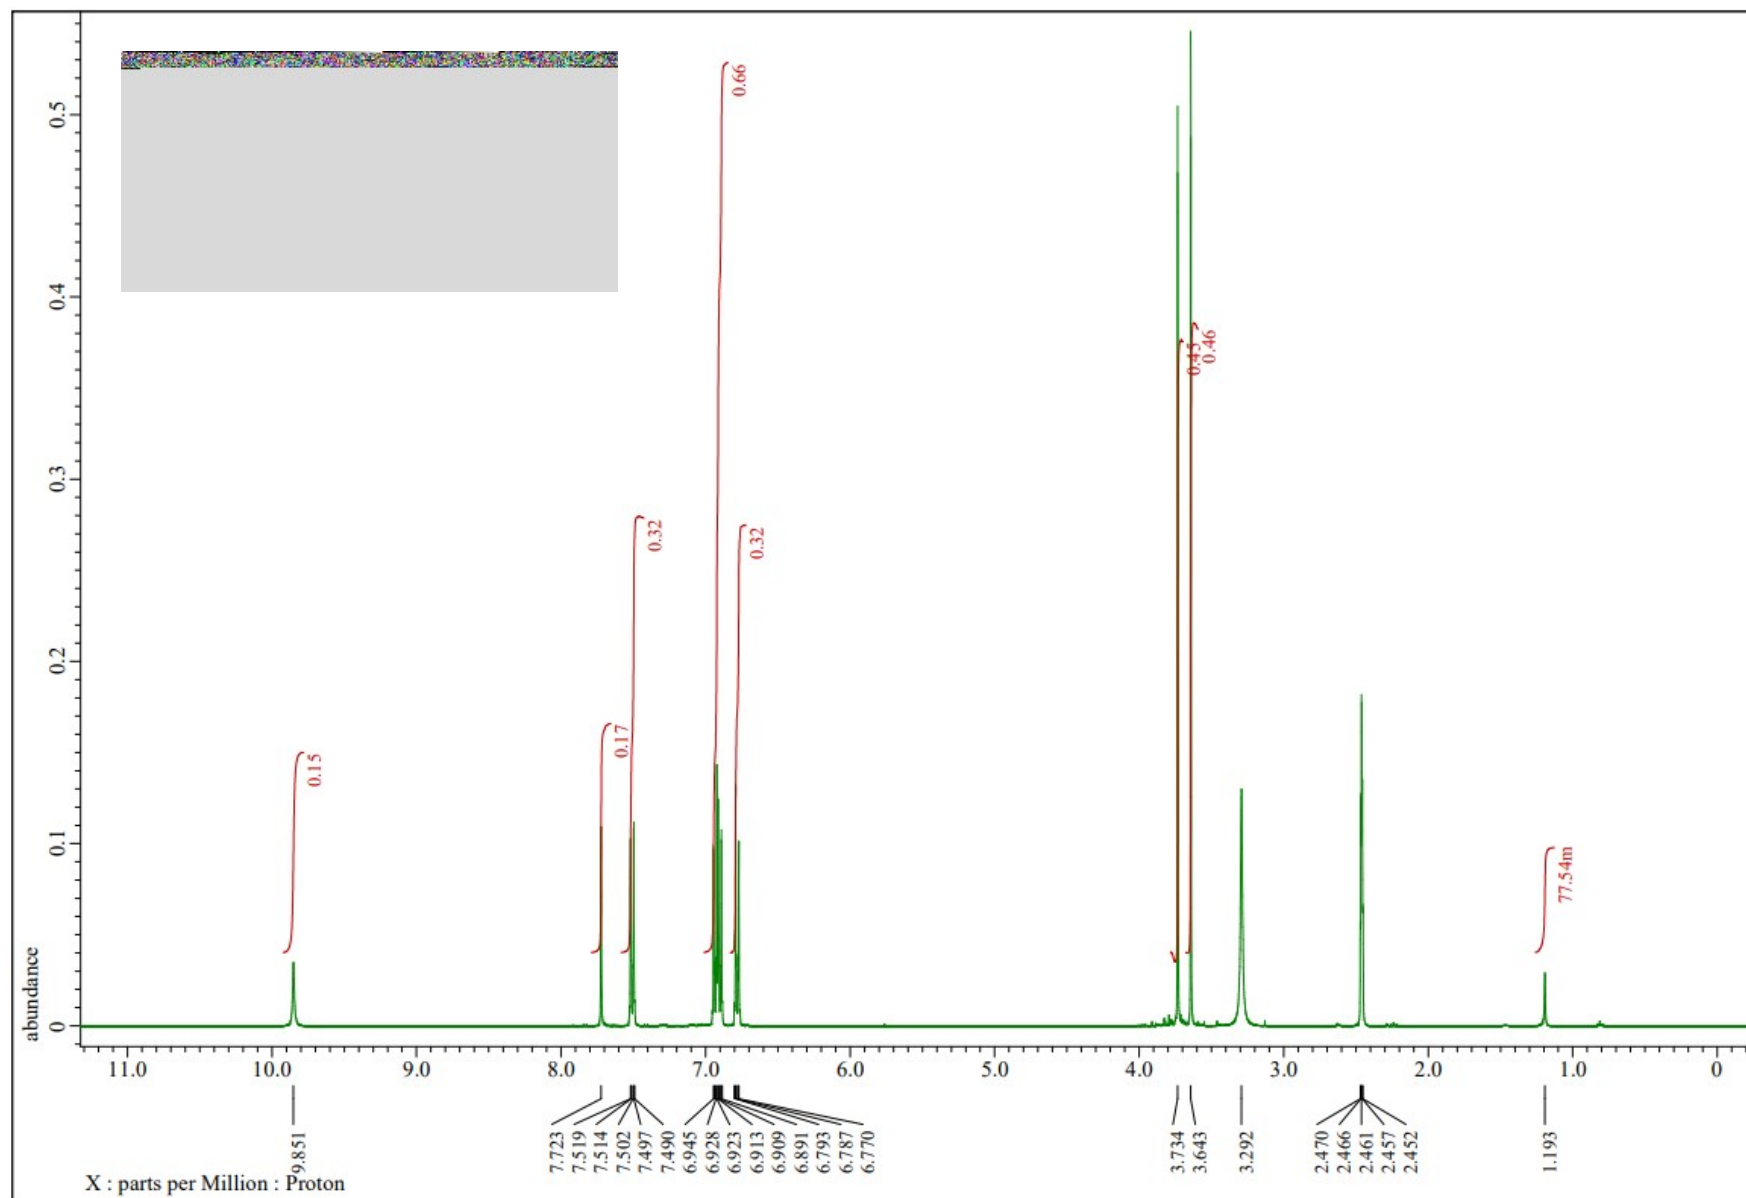

Figure S21. NMR spectrum of (*E*)-1-(4-methoxybenzylidene)-2-(4-methoxyphenyl)hydrazine (**1**).

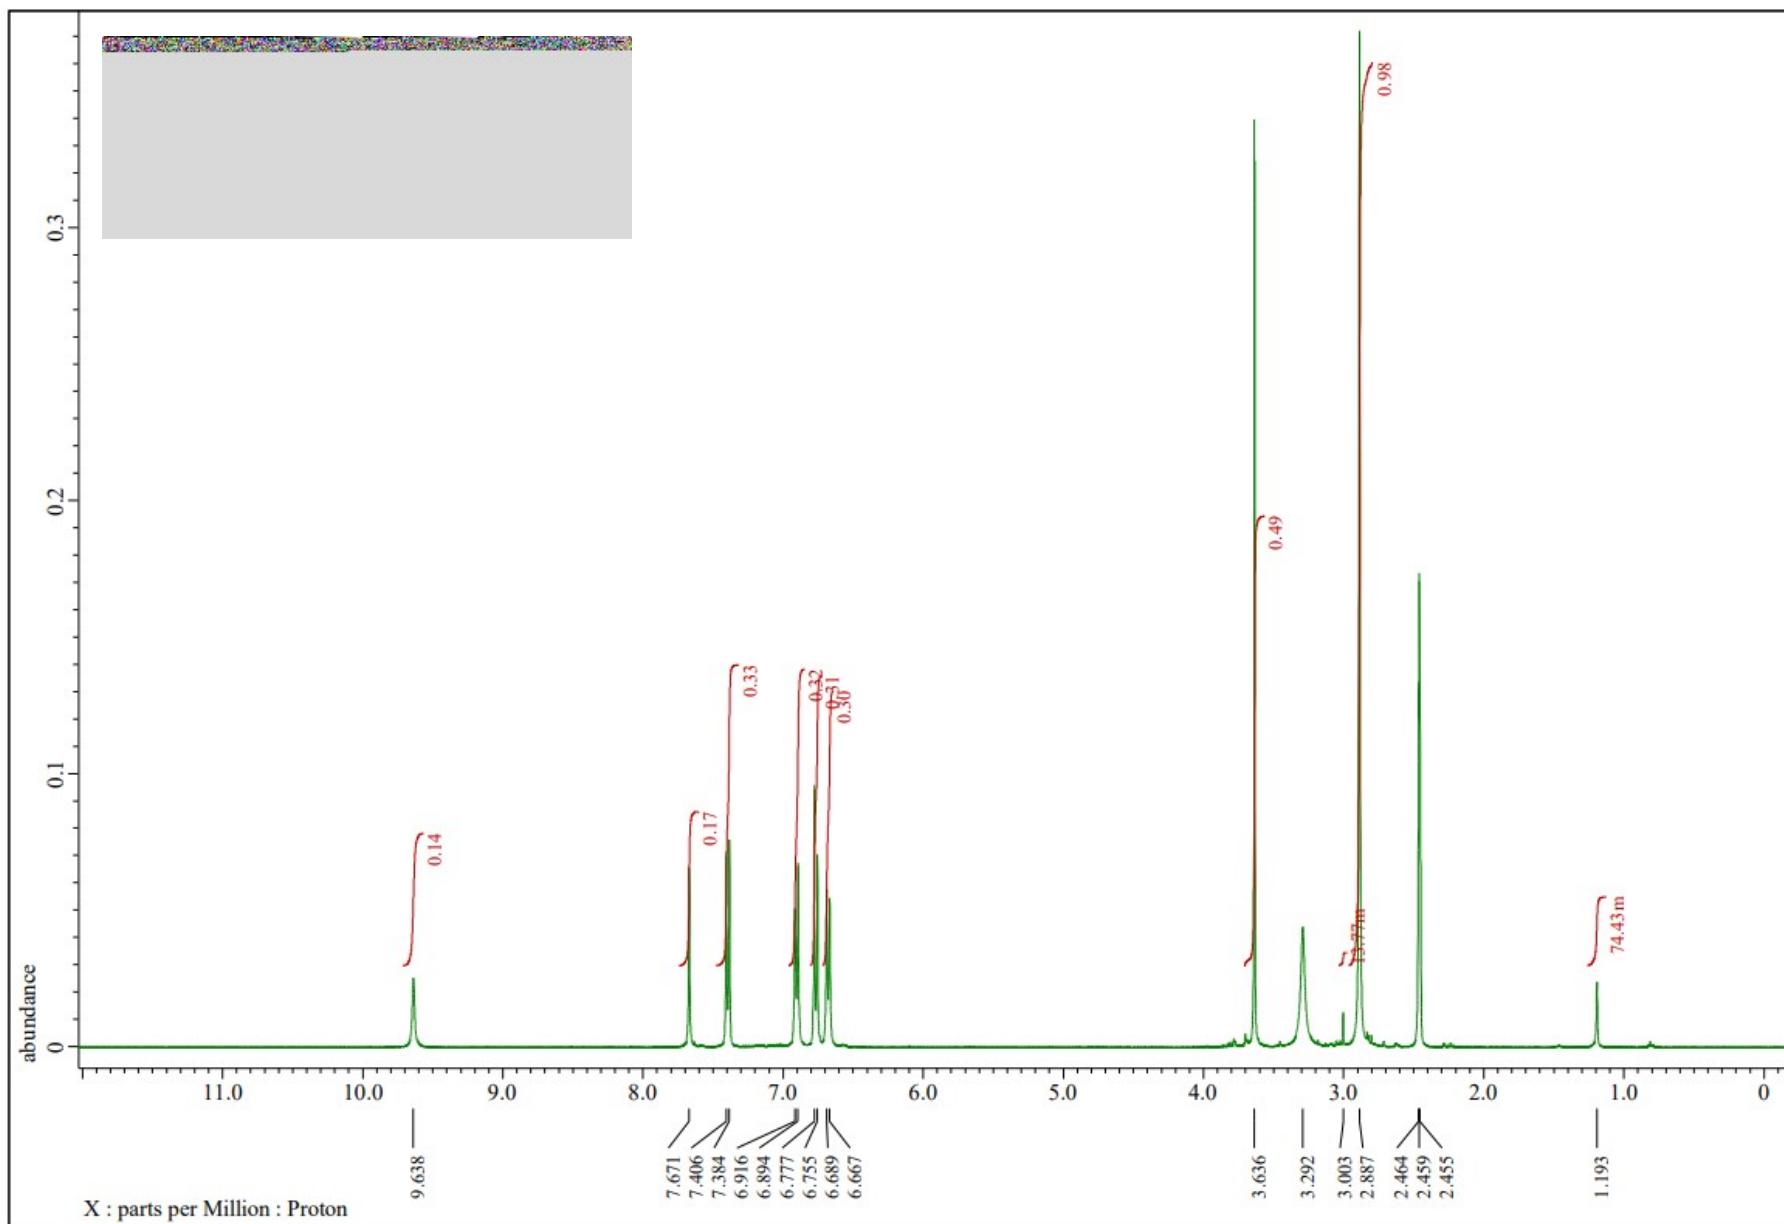

Figure S22. NMR spectrum of (*E*)-4-((2-(4-methoxyphenyl)hydrazineylidene)methyl)-*N,N*-dimethylaniline (**2**).

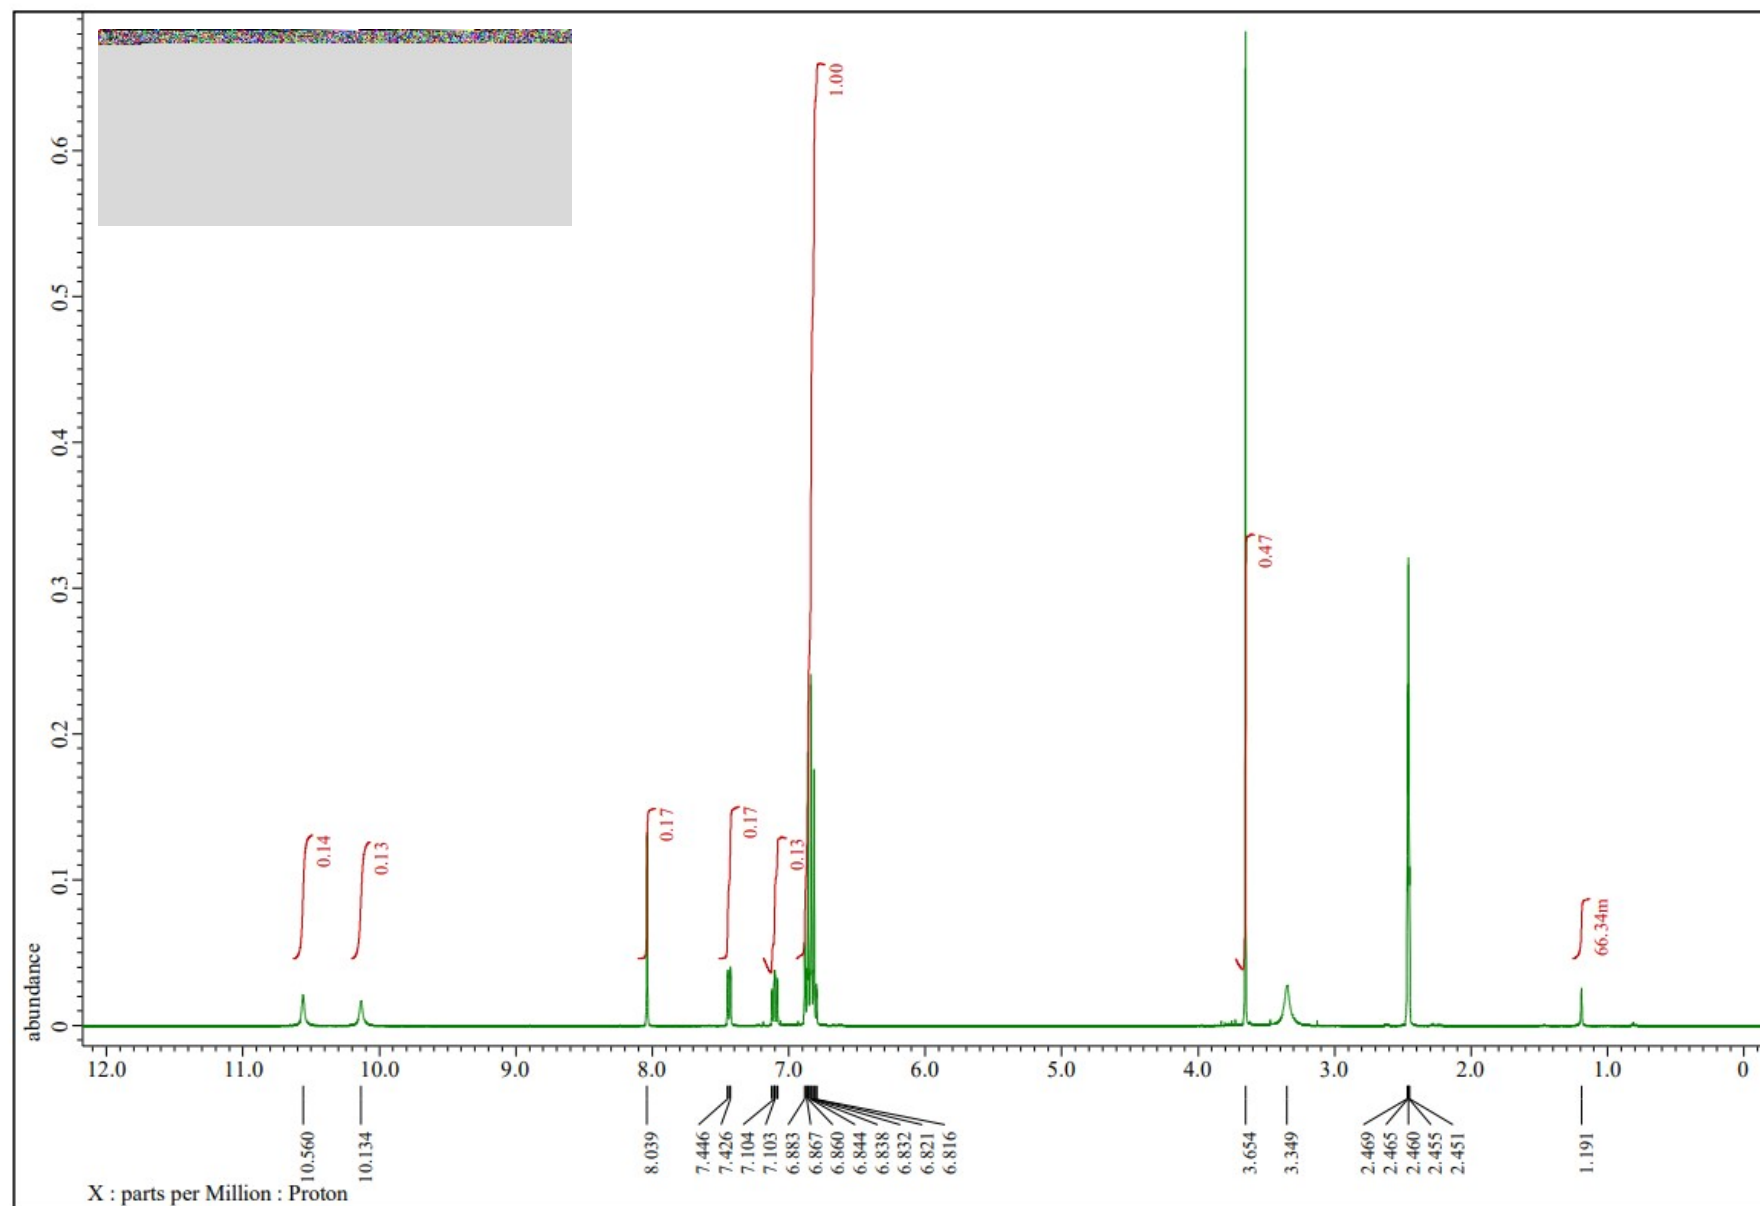

Figure S23. NMR spectrum of (*E*)-2-((2-(4-methoxyphenyl)hydrazineylidene)methyl)phenol (**3**).

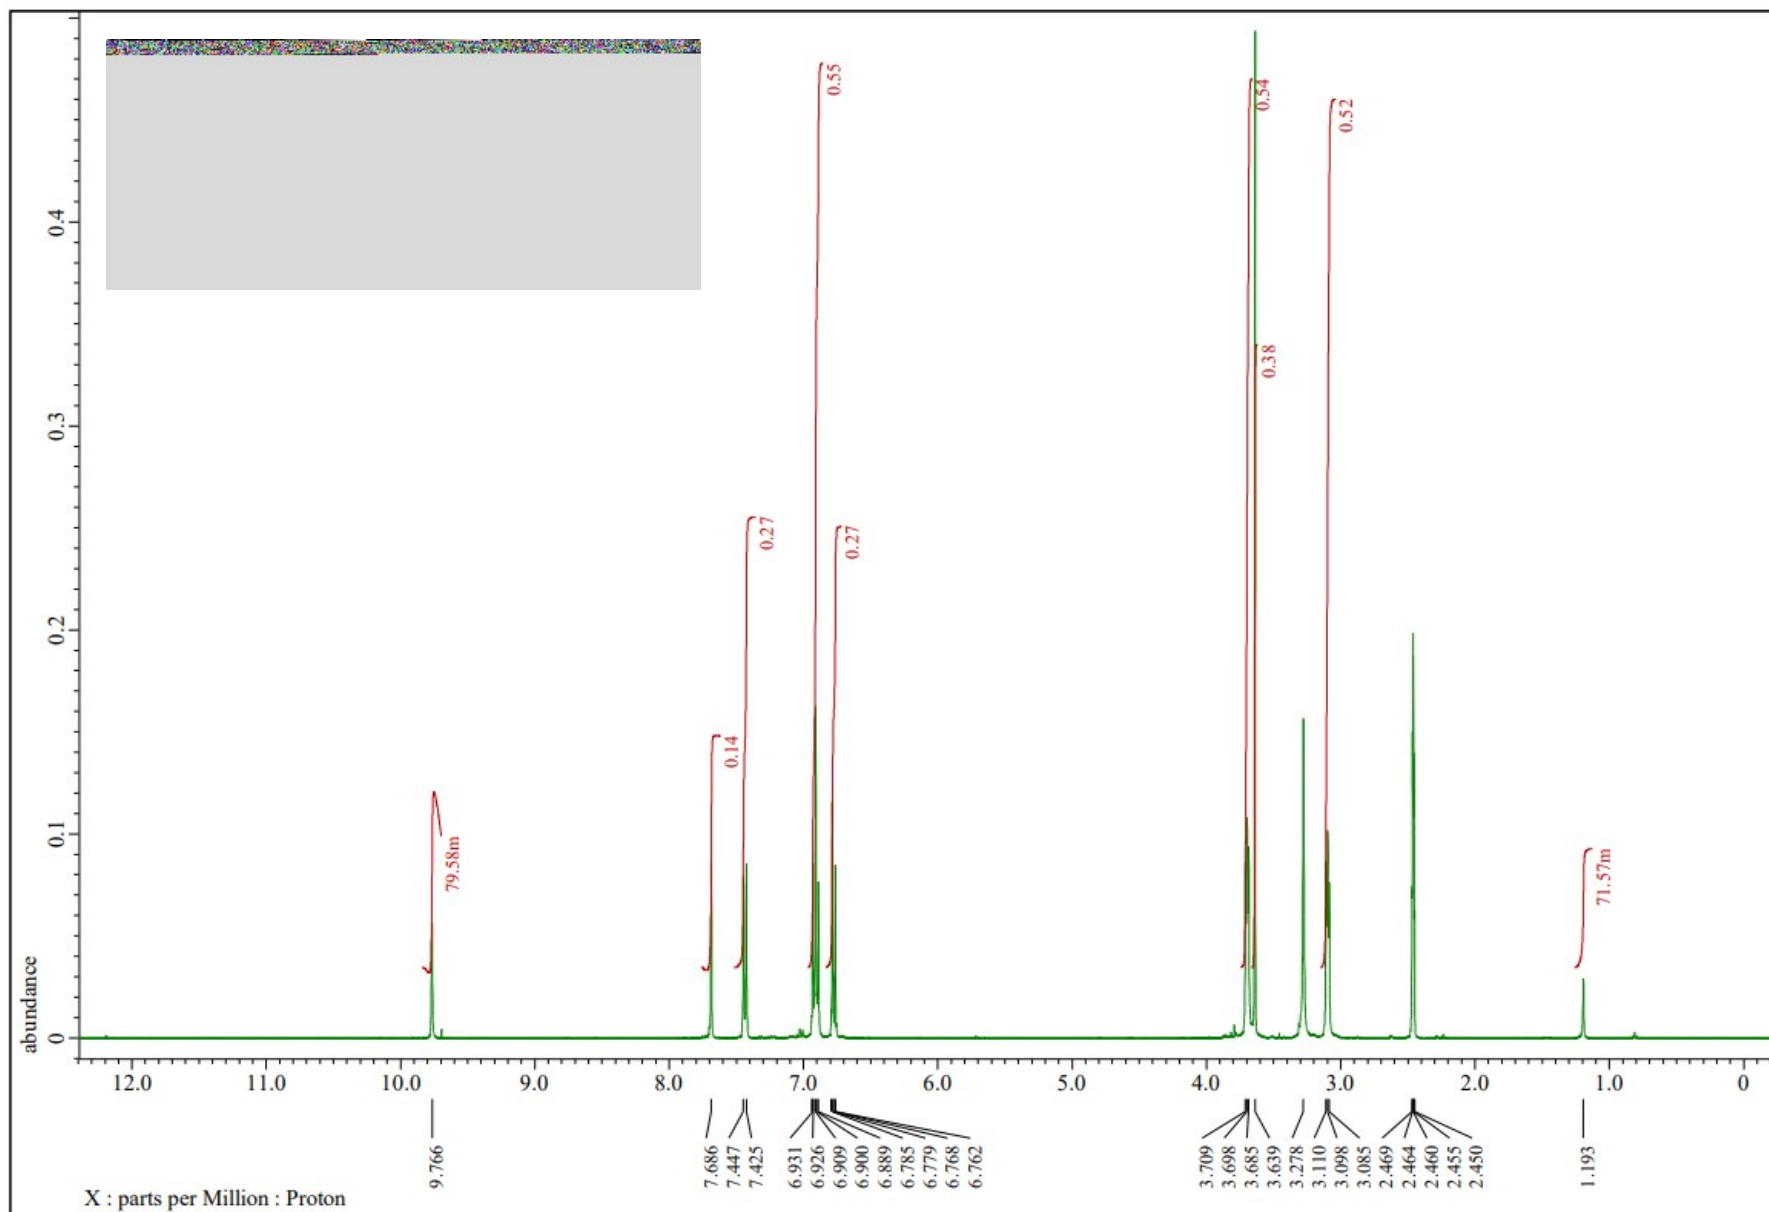

Figure S24. NMR spectrum of (*E*)-4-(4-((2-(4-methoxyphenyl)hydrazineylidene)methyl)phenyl)morpholine (**4**).

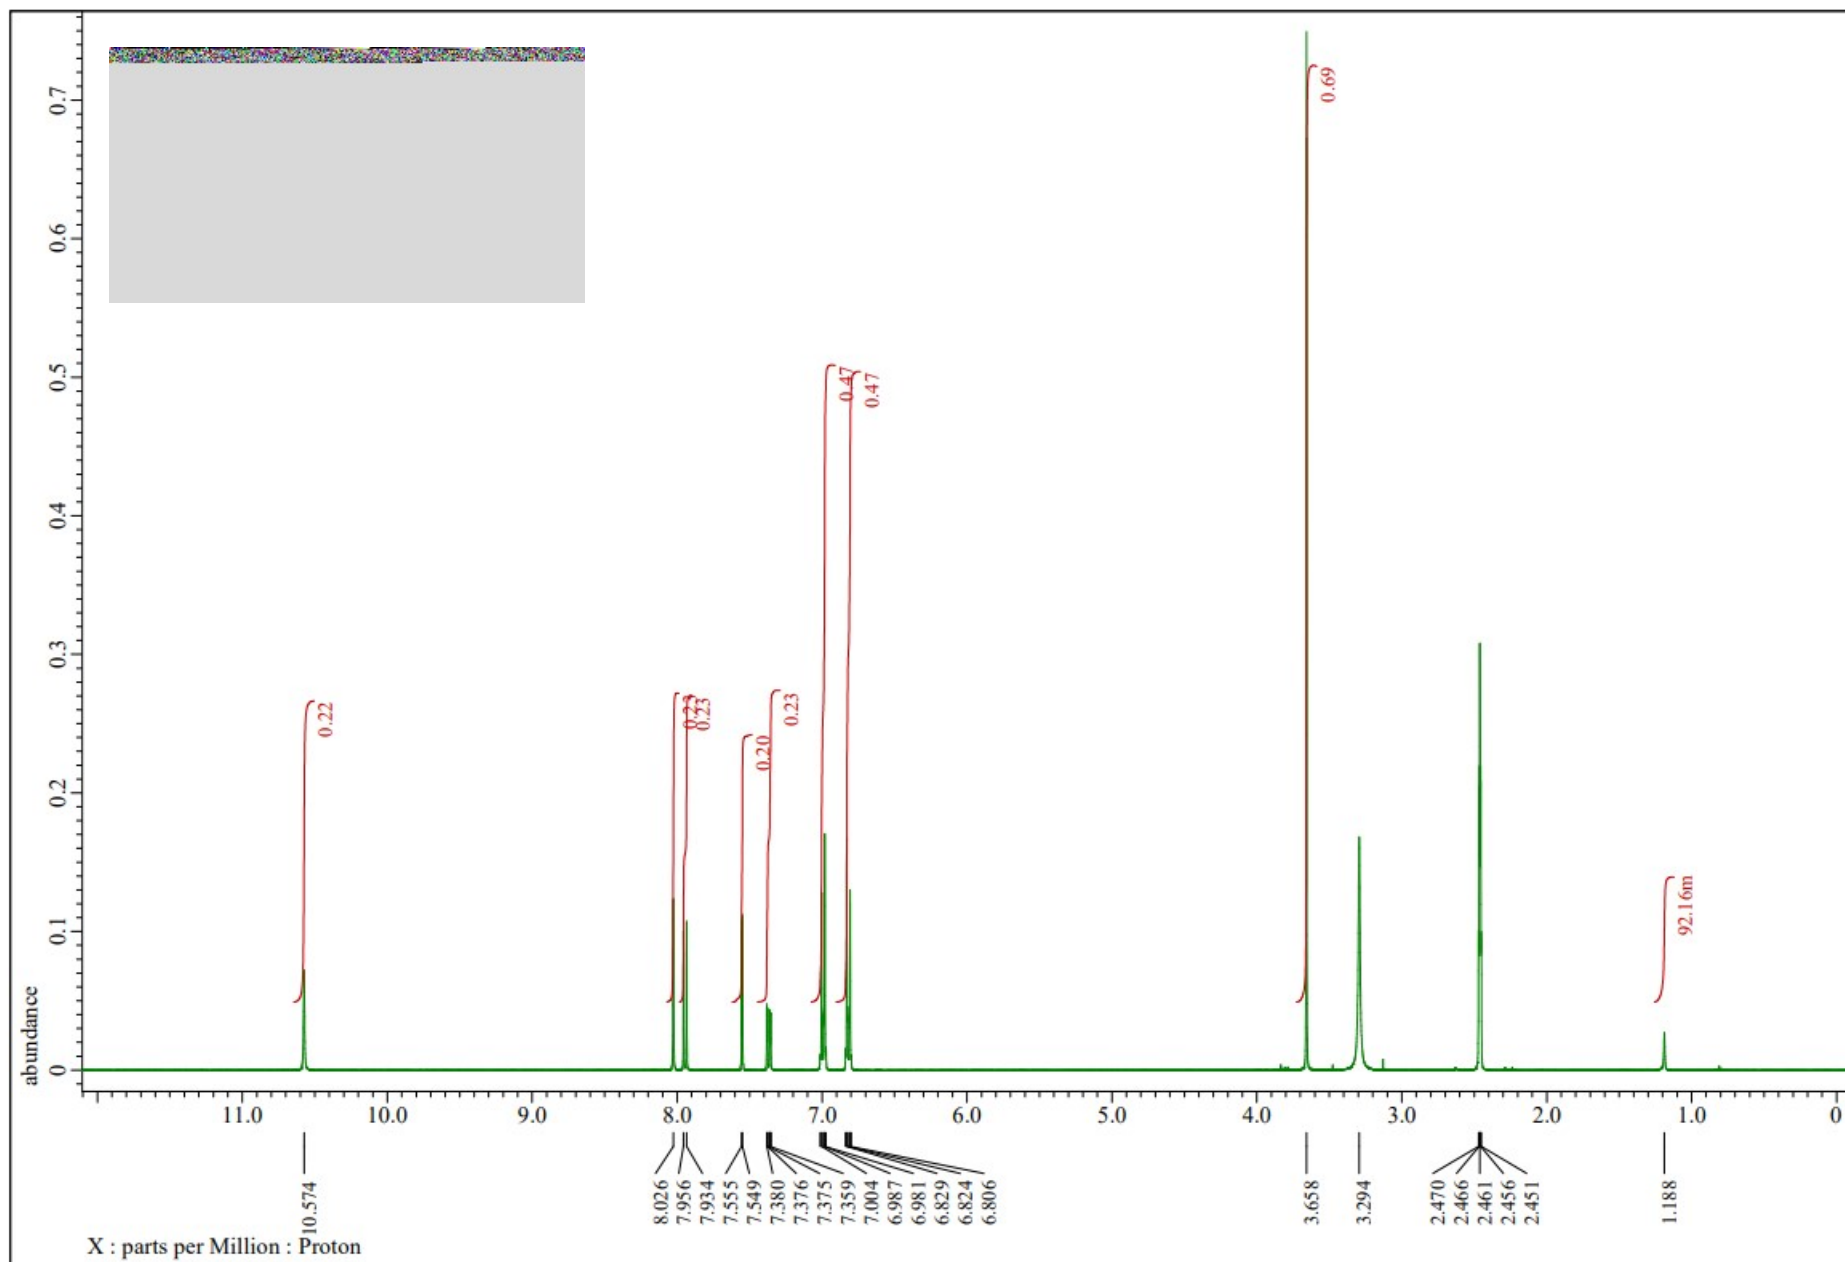

Figure S25. NMR spectrum of (*E*)-1-(2,4-dichlorobenzylidene)-2-(4-methoxyphenyl)hydrazine (**5**).

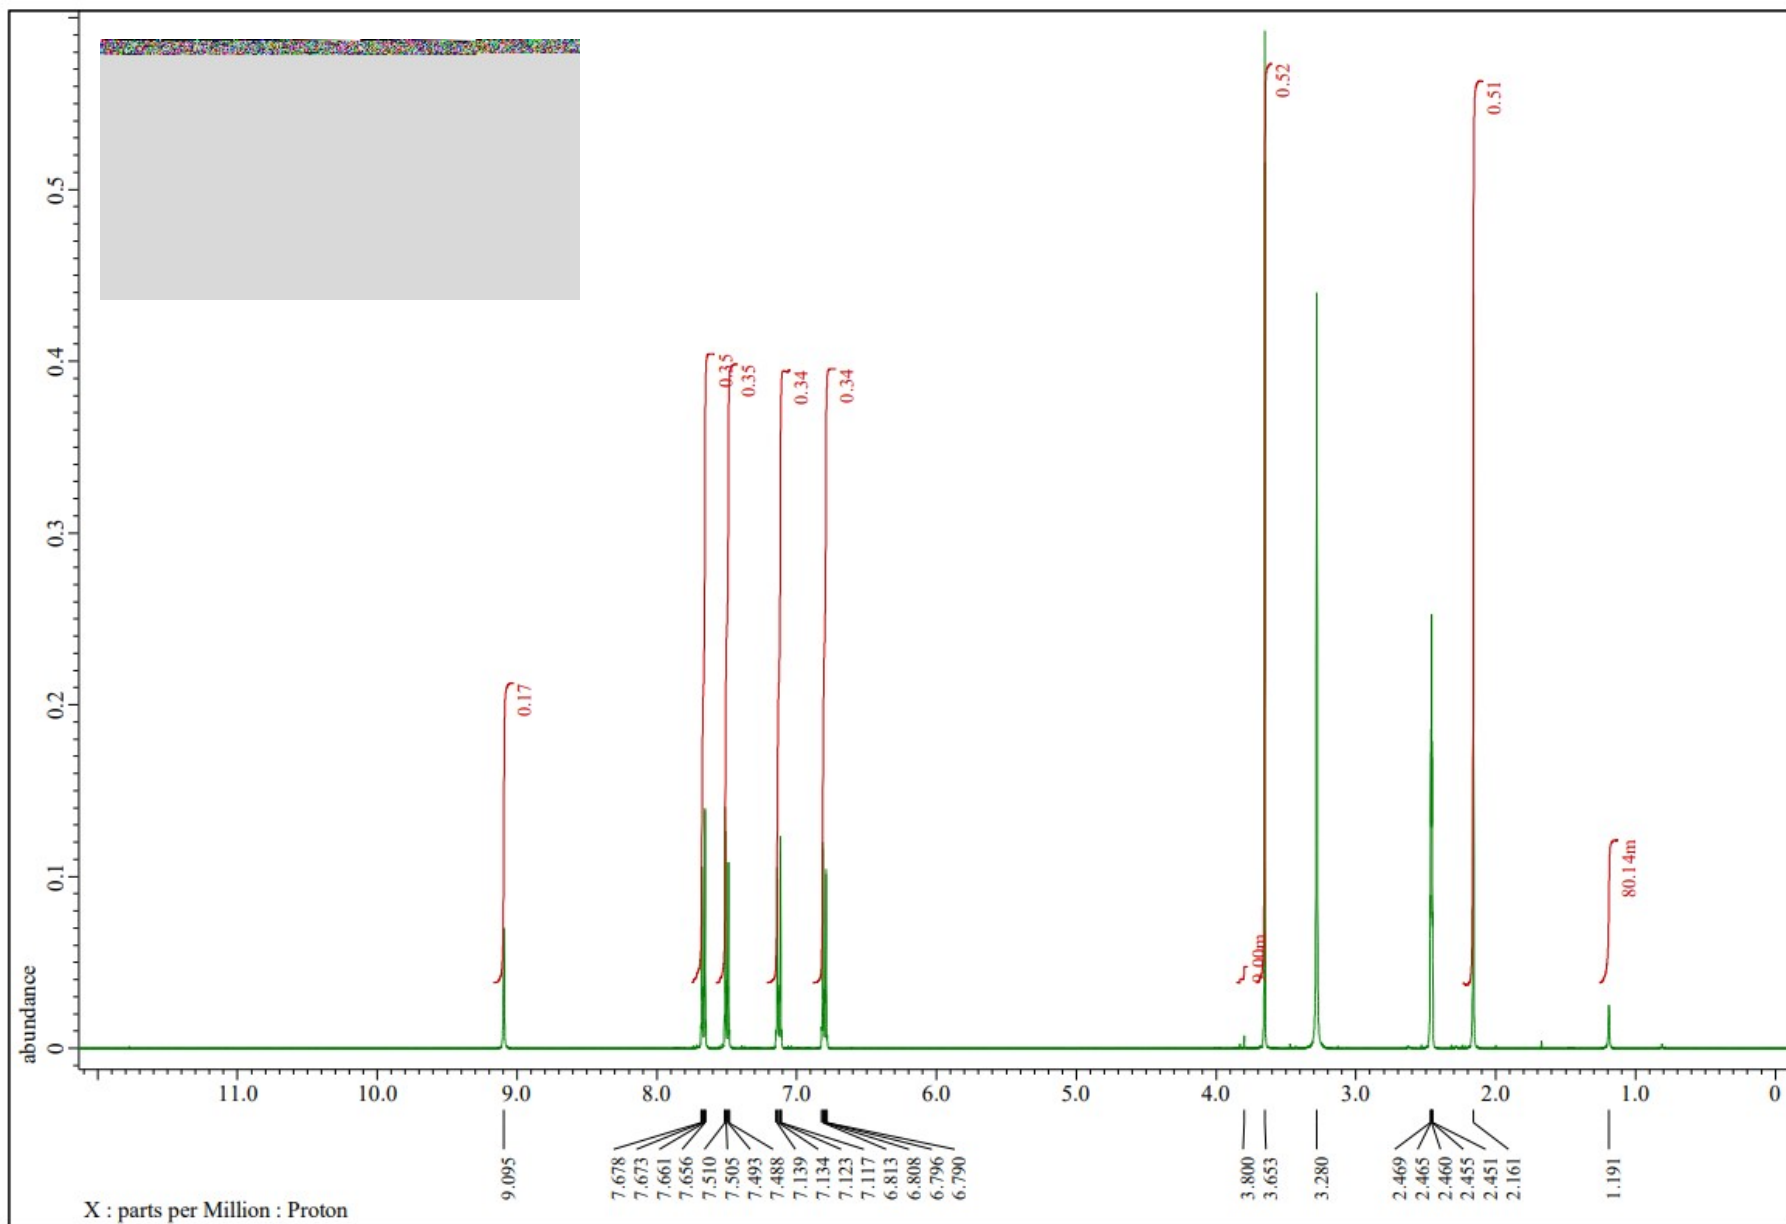

Figure S26. NMR spectrum of (*E*)-1-(1-(4-bromophenyl)ethylidene)-2-(4-methoxyphenyl)hydrazine (**6**).

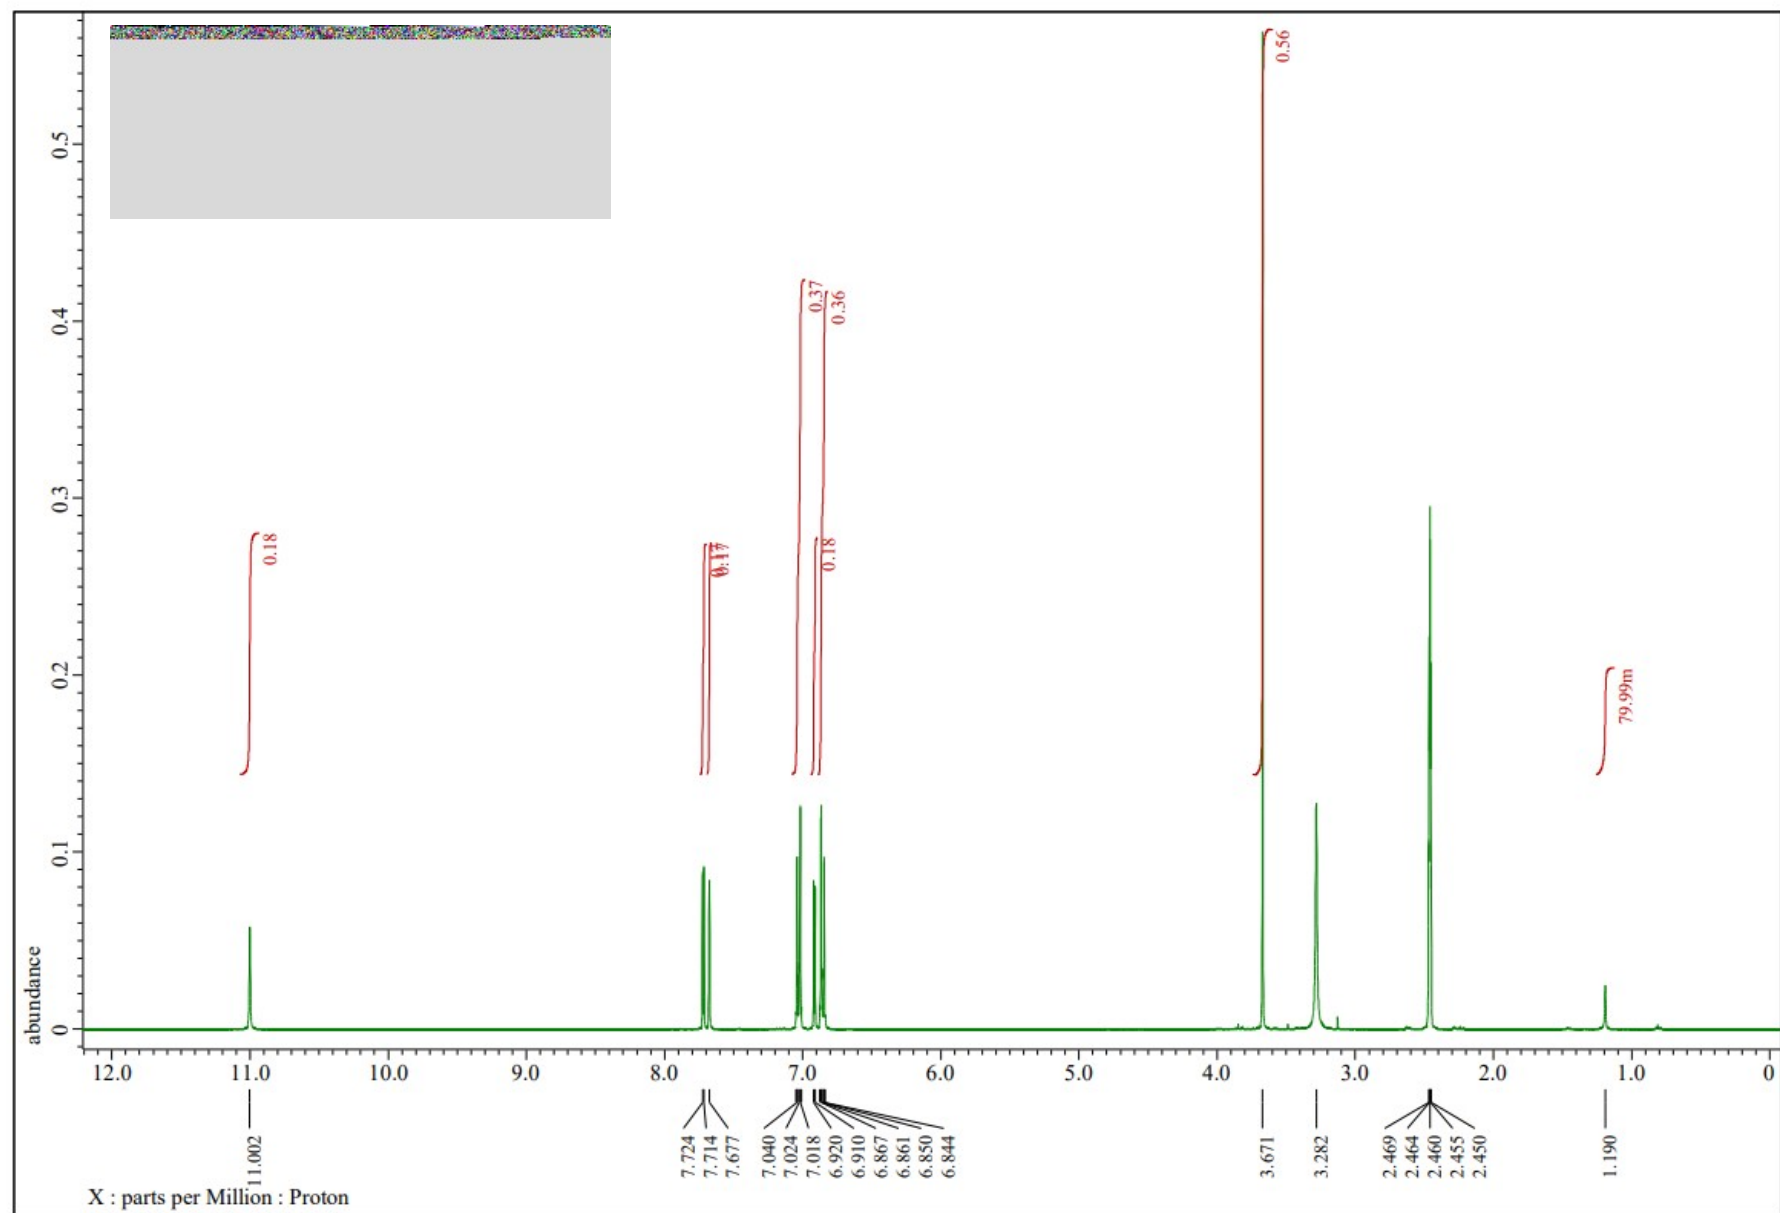

Figure S27. NMR spectrum of (E)-1-(4-methoxyphenyl)-2-((5-nitrofur-2-yl)methylene)hydrazine (7).

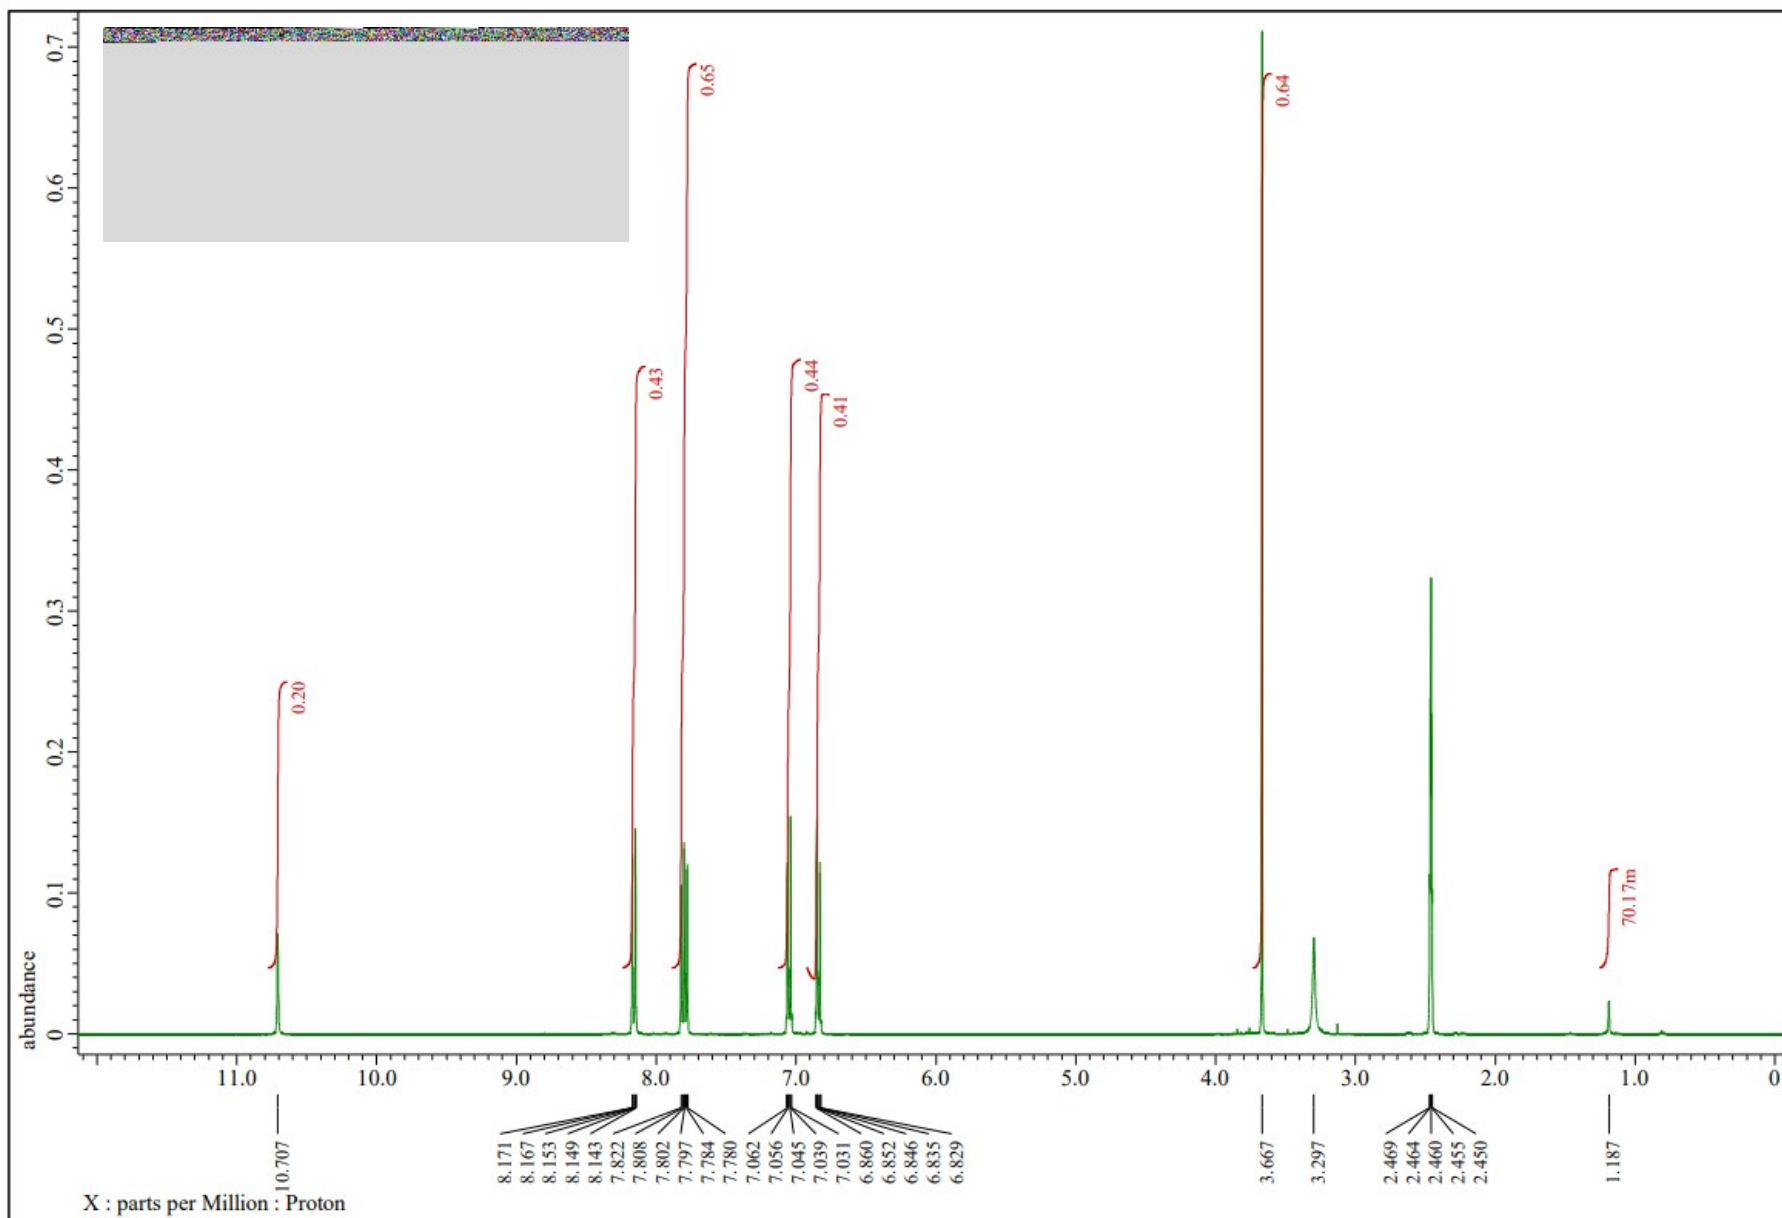

Figure S28. NMR spectrum of (*E*)-1-(4-methoxyphenyl)-2-(4-nitrobenzylidene)hydrazine (**8**).



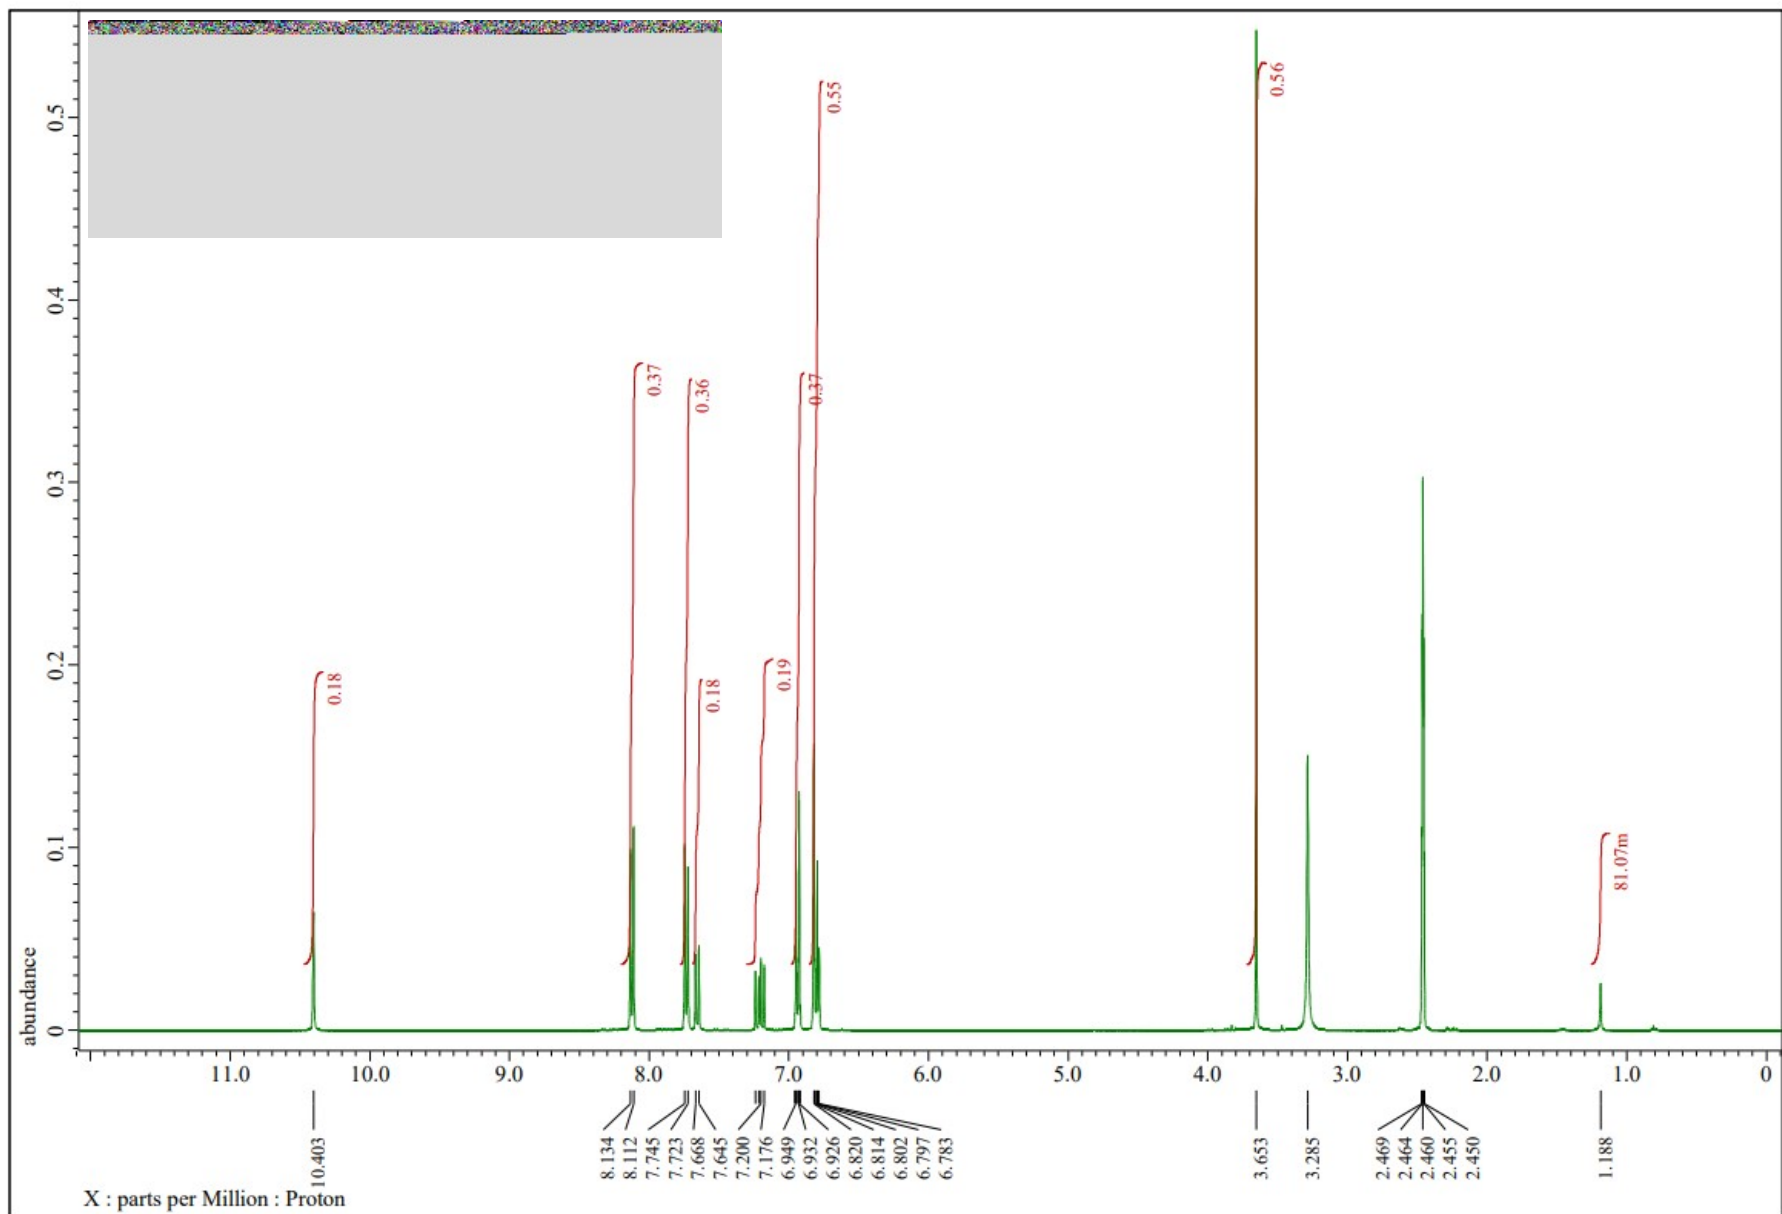

Figure S29. NMR spectrum of (*E*)-1-(4-methoxyphenyl)-2-(3-(4-nitrophenyl)propylidene)hydrazine (**9**).

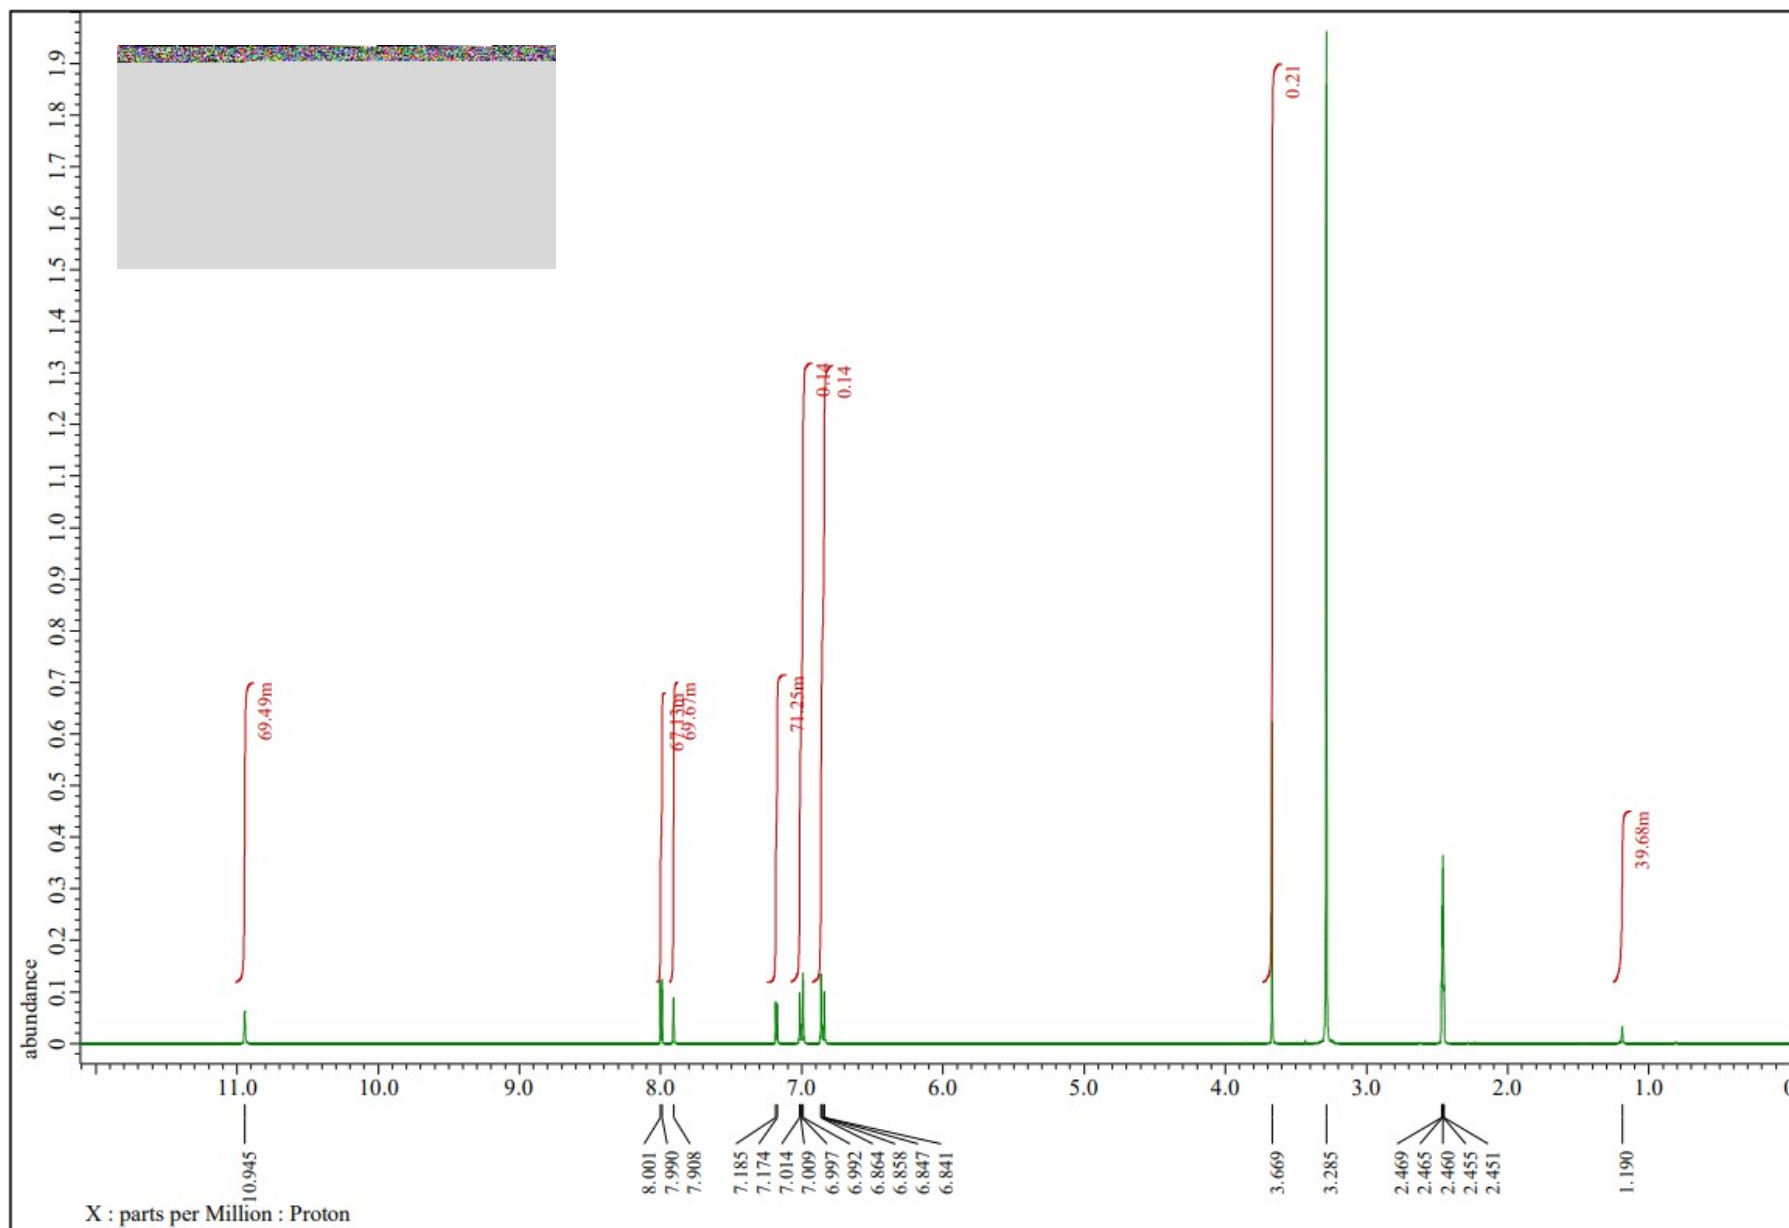

Figure S30. NMR spectrum of (*E*)-1-(4-methoxyphenyl)-2-((5-nitrothiophen-2-yl)methylene)hydrazine (**10**).

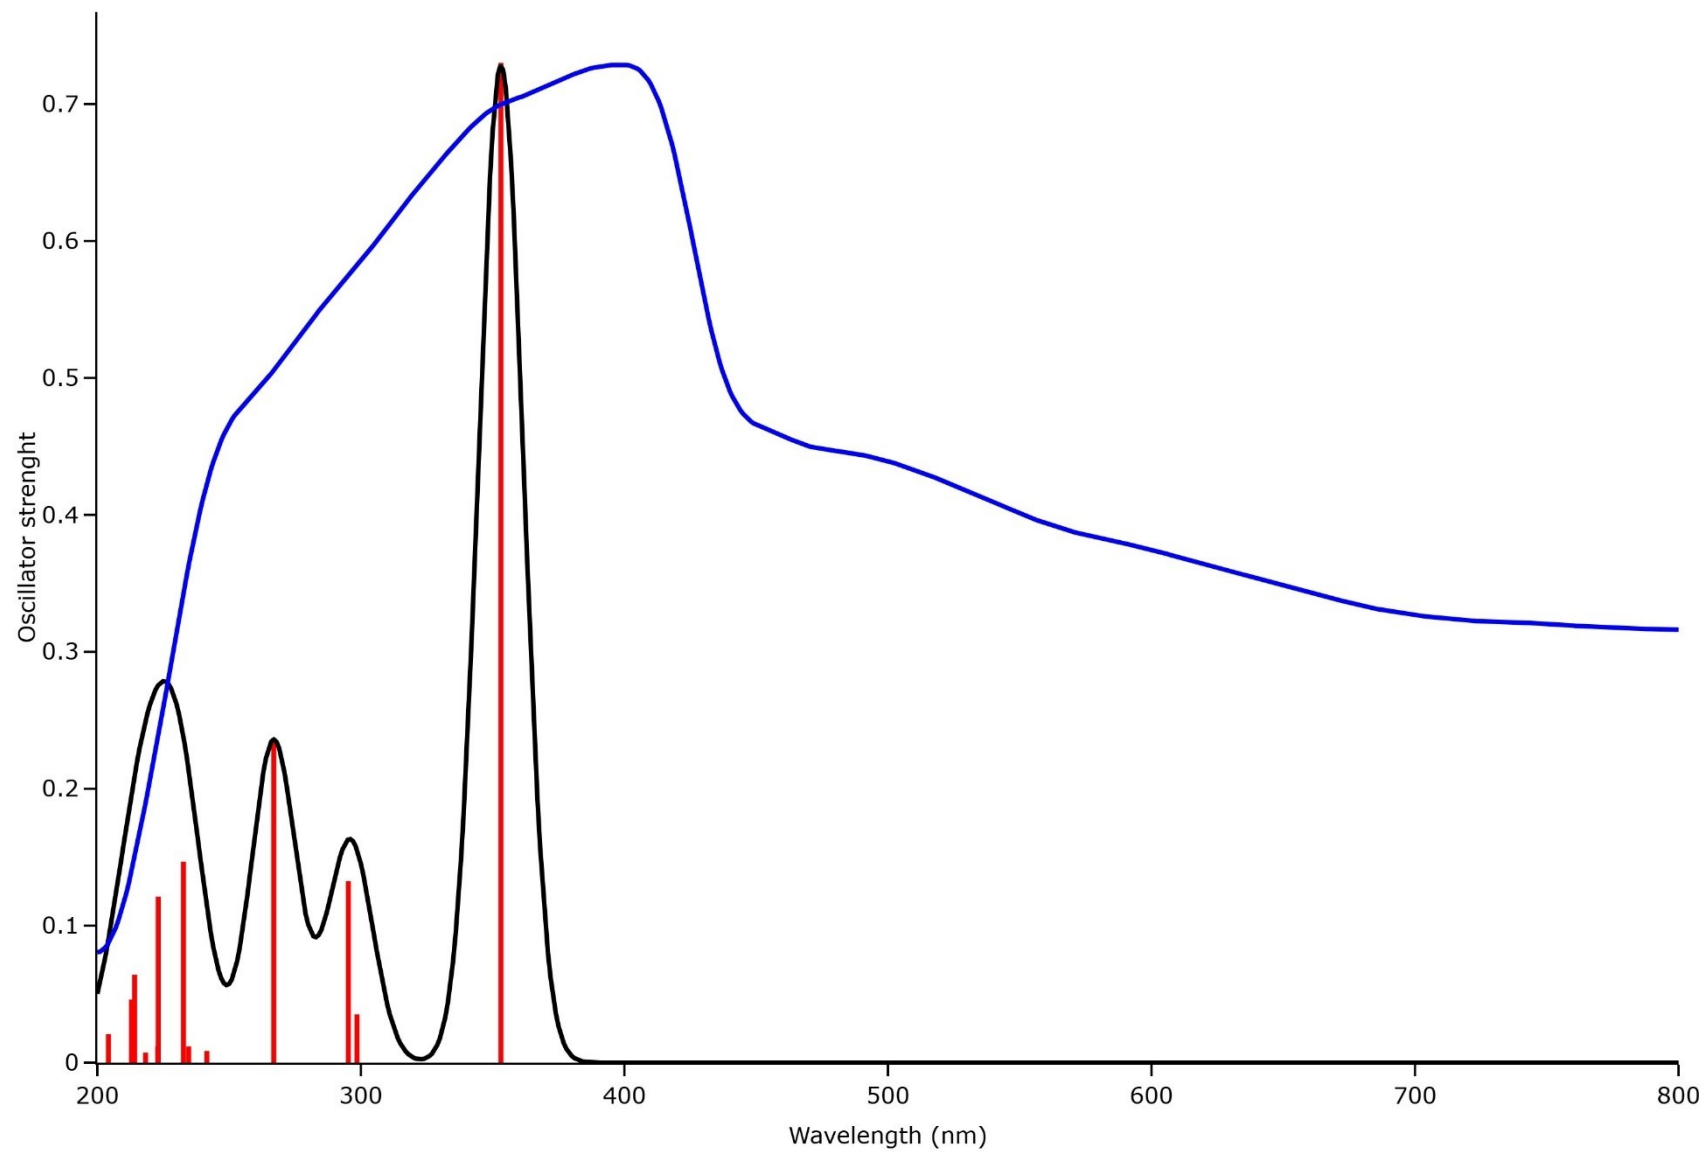

Figure S31. Experimental (blue) and calculated (black) UV-Vis spectrum of **1**. Oscillator strengths are represented as vertical navy-red lines.

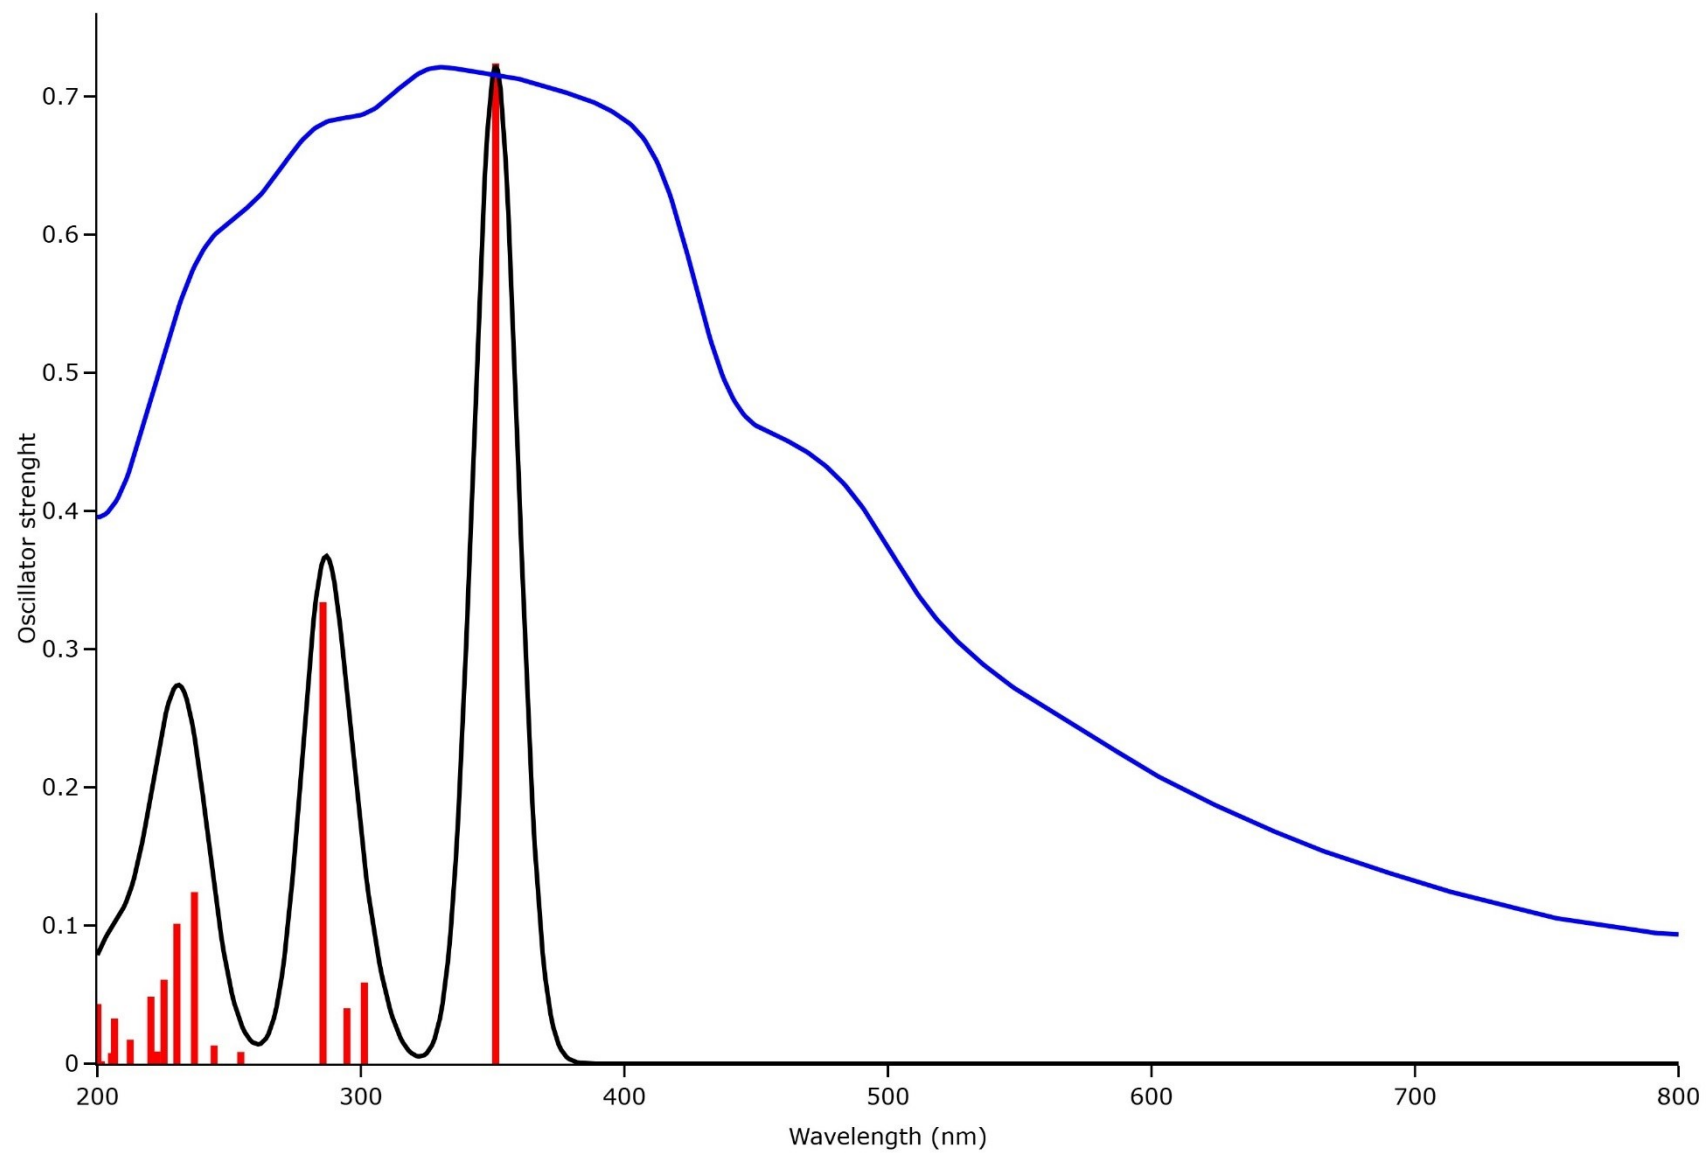

Figure S32. Experimental (blue) and calculated (black) UV-Vis spectrum of **2**. Oscillator strengths are represented as vertical navy-red lines.

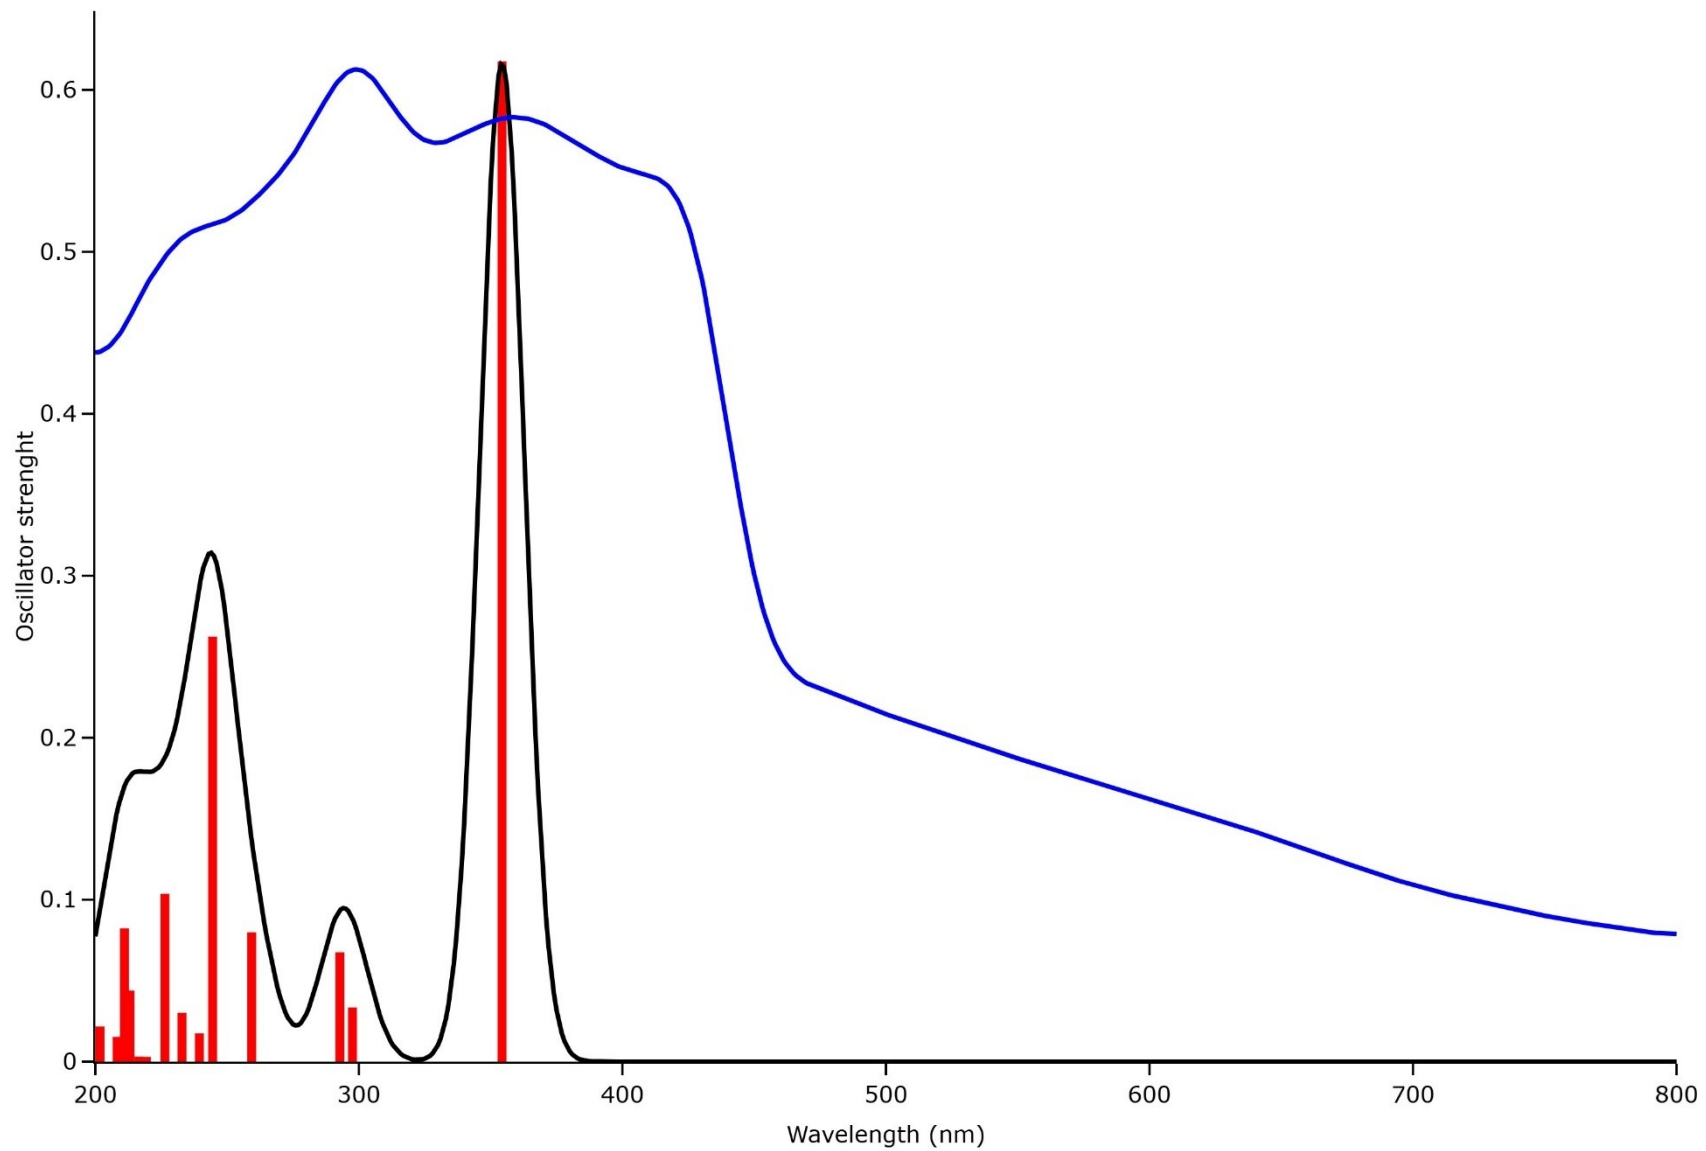

Figure S33. Experimental (blue) and calculated (black) UV-Vis spectrum of **3**. Oscillator strengths are represented as vertical navy-red lines.

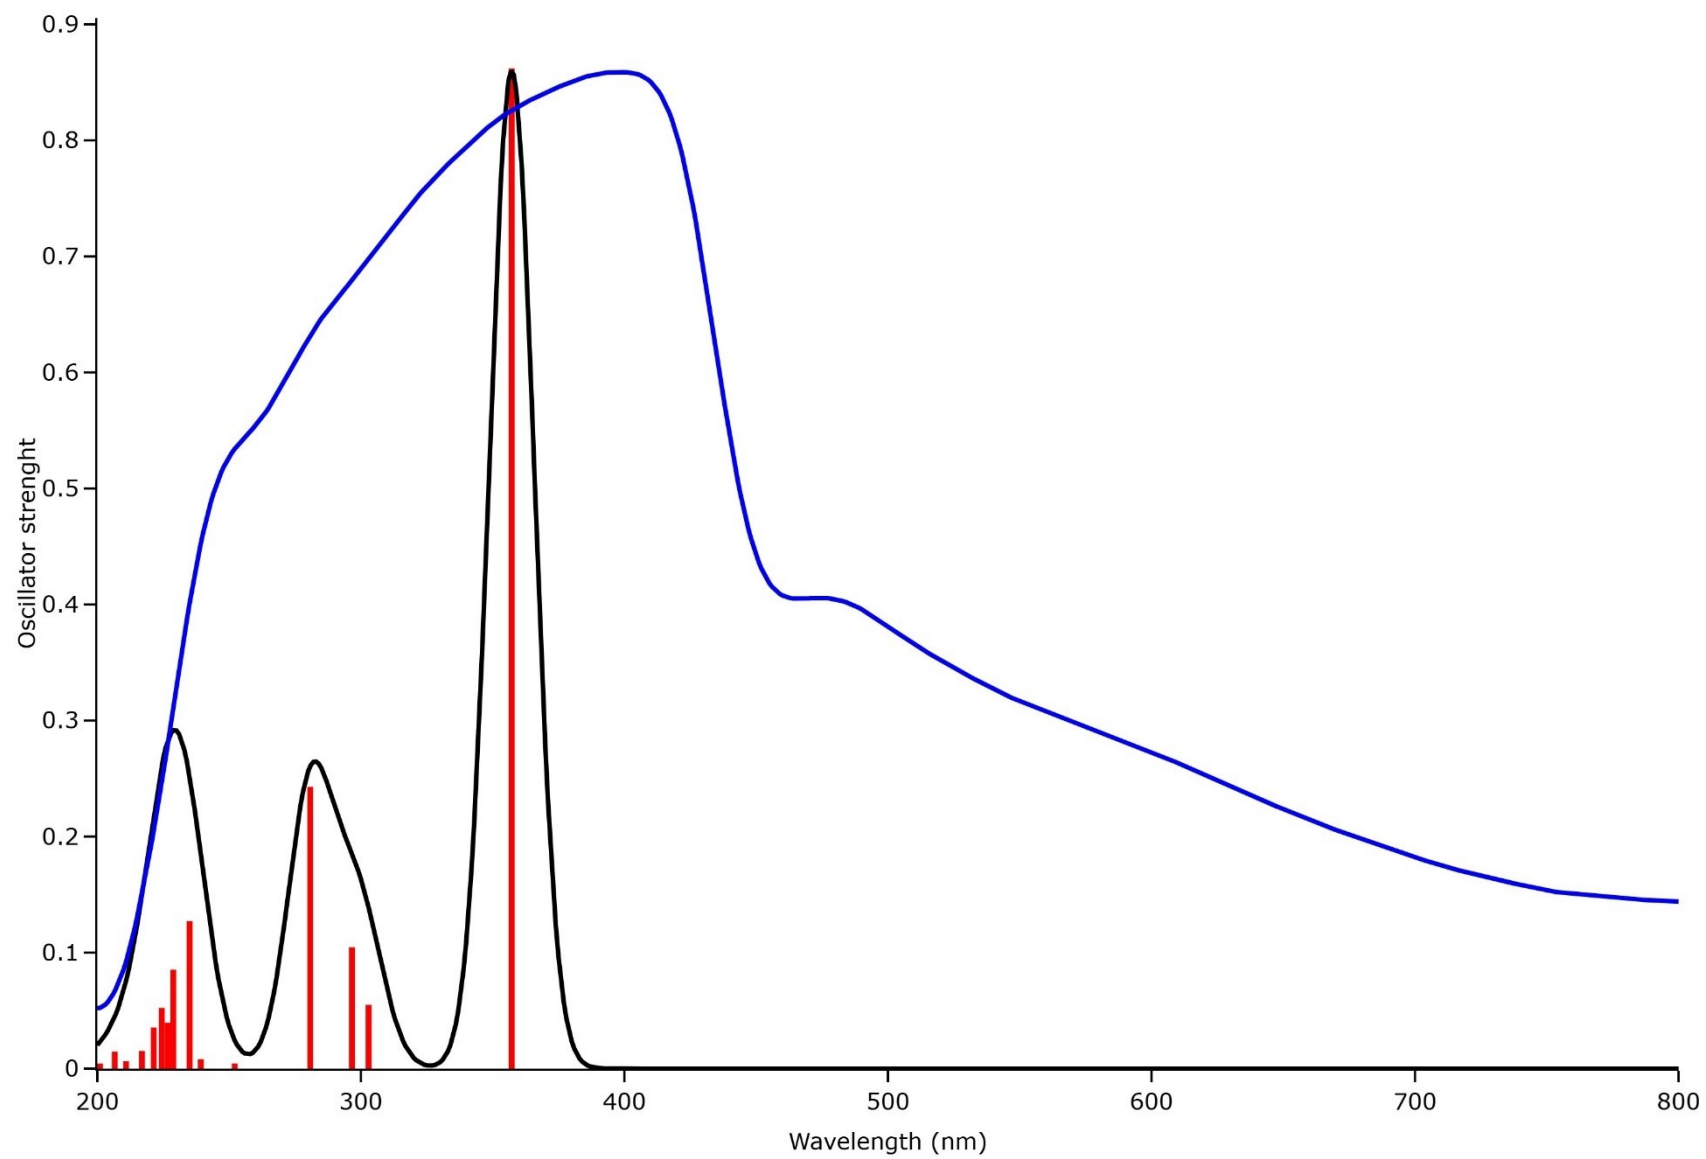

Figure S34. Experimental (blue) and calculated (black) UV-Vis spectrum of **4**. Oscillator strengths are represented as vertical navy-red lines.

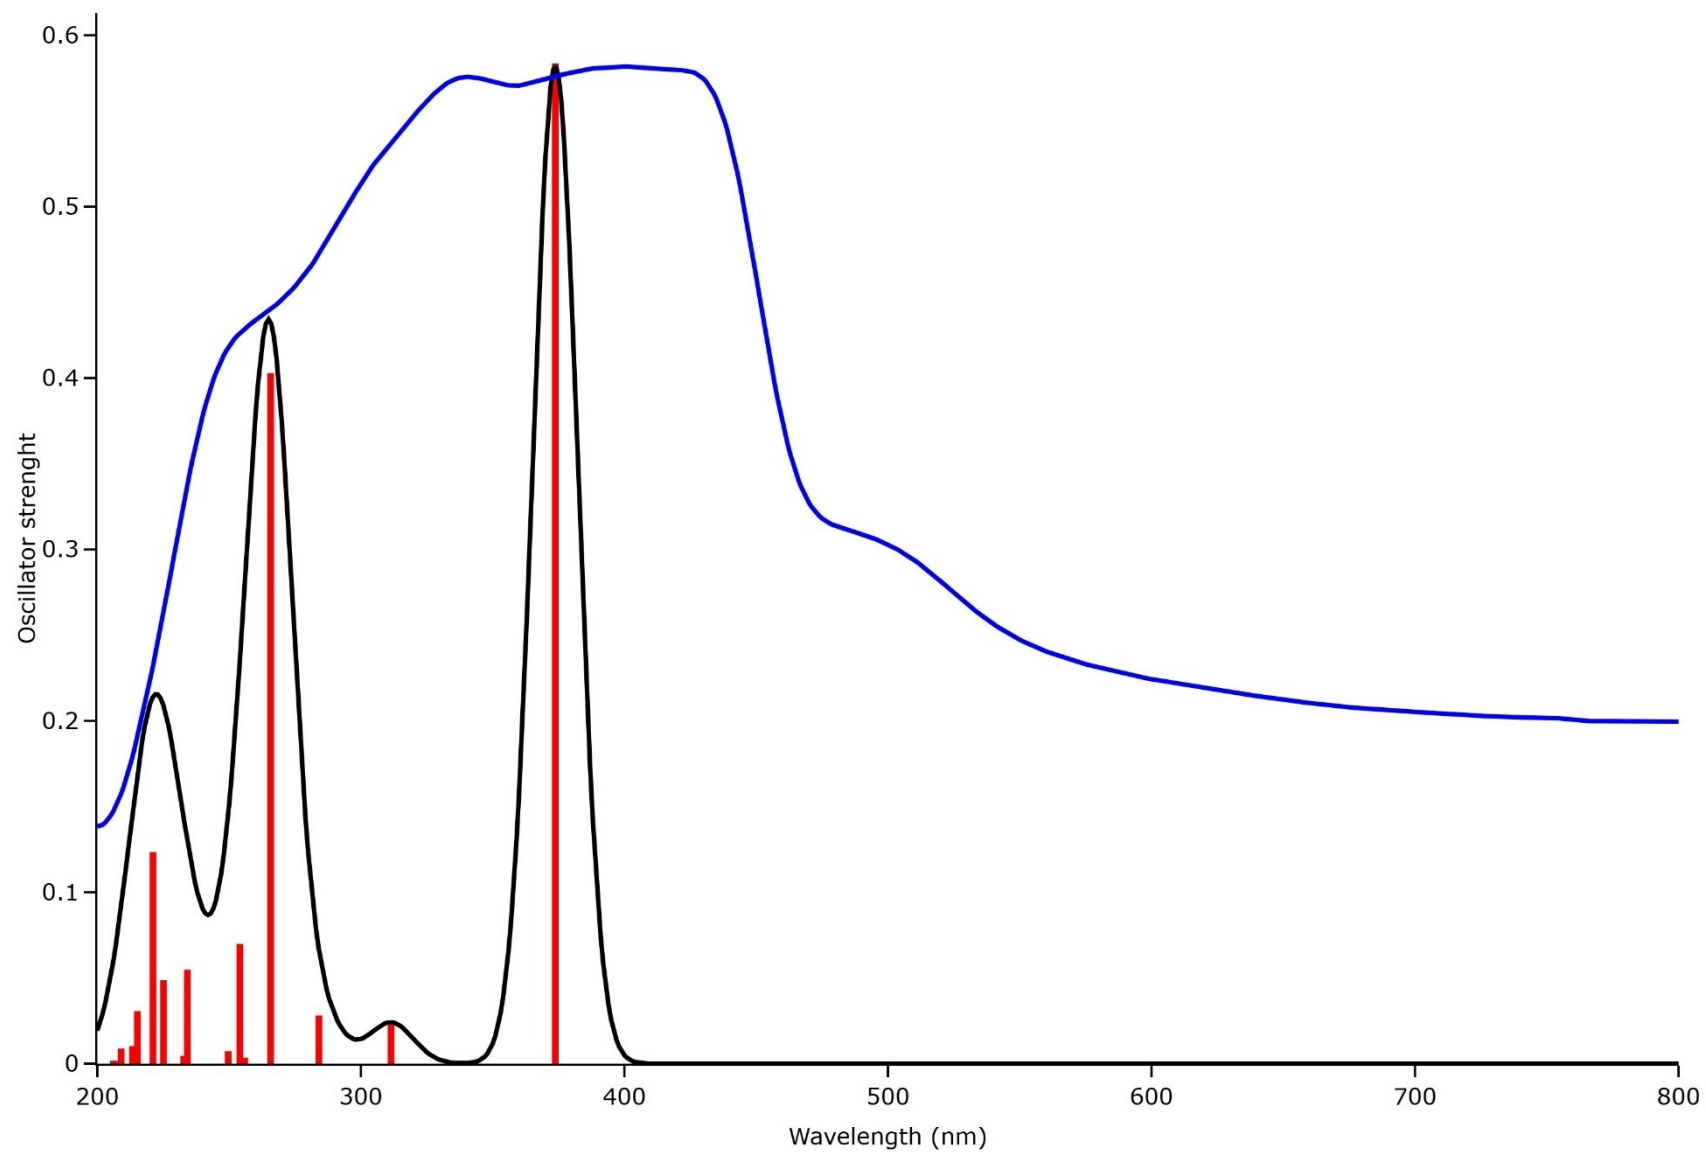

Figure S35. Experimental (blue) and calculated (black) UV-Vis spectrum of **5**. Oscillator strengths are represented as vertical navy-red lines.

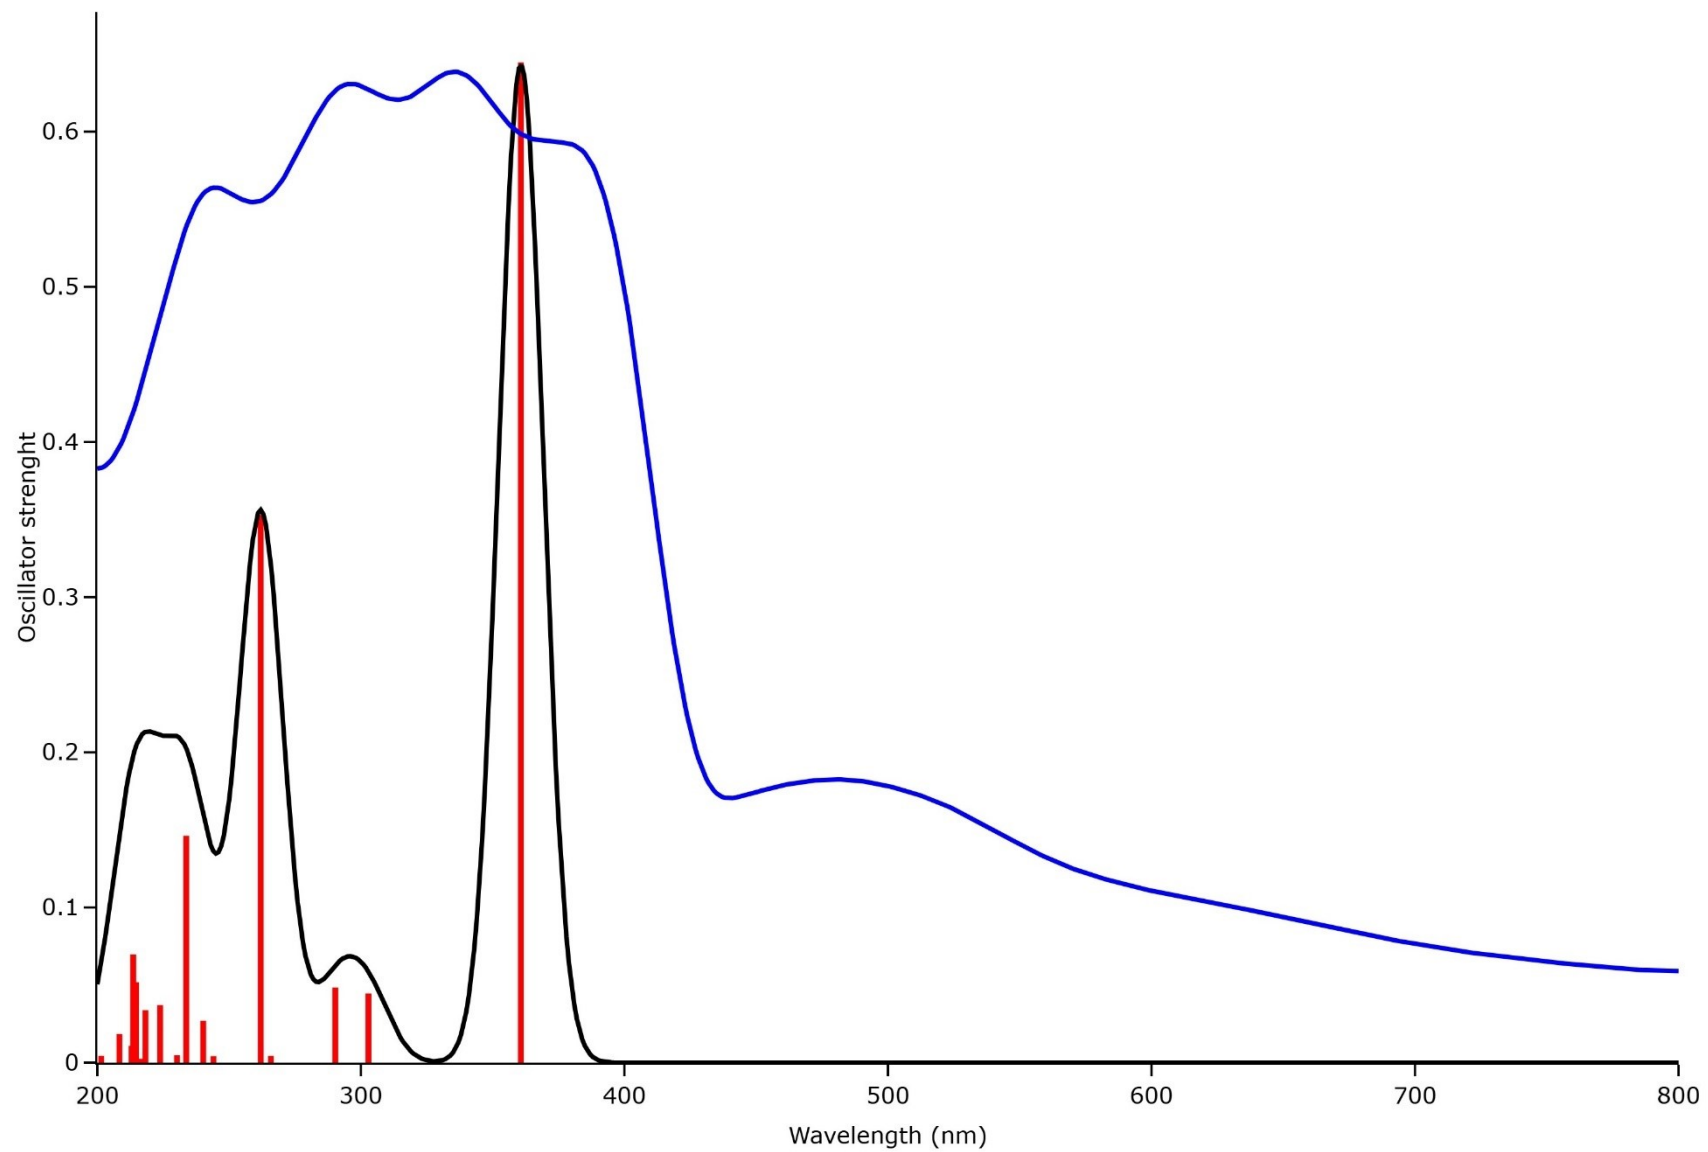

Figure S36. Experimental (blue) and calculated (black) UV-Vis spectrum of **6**. Oscillator strengths are represented as vertical navy-red lines.



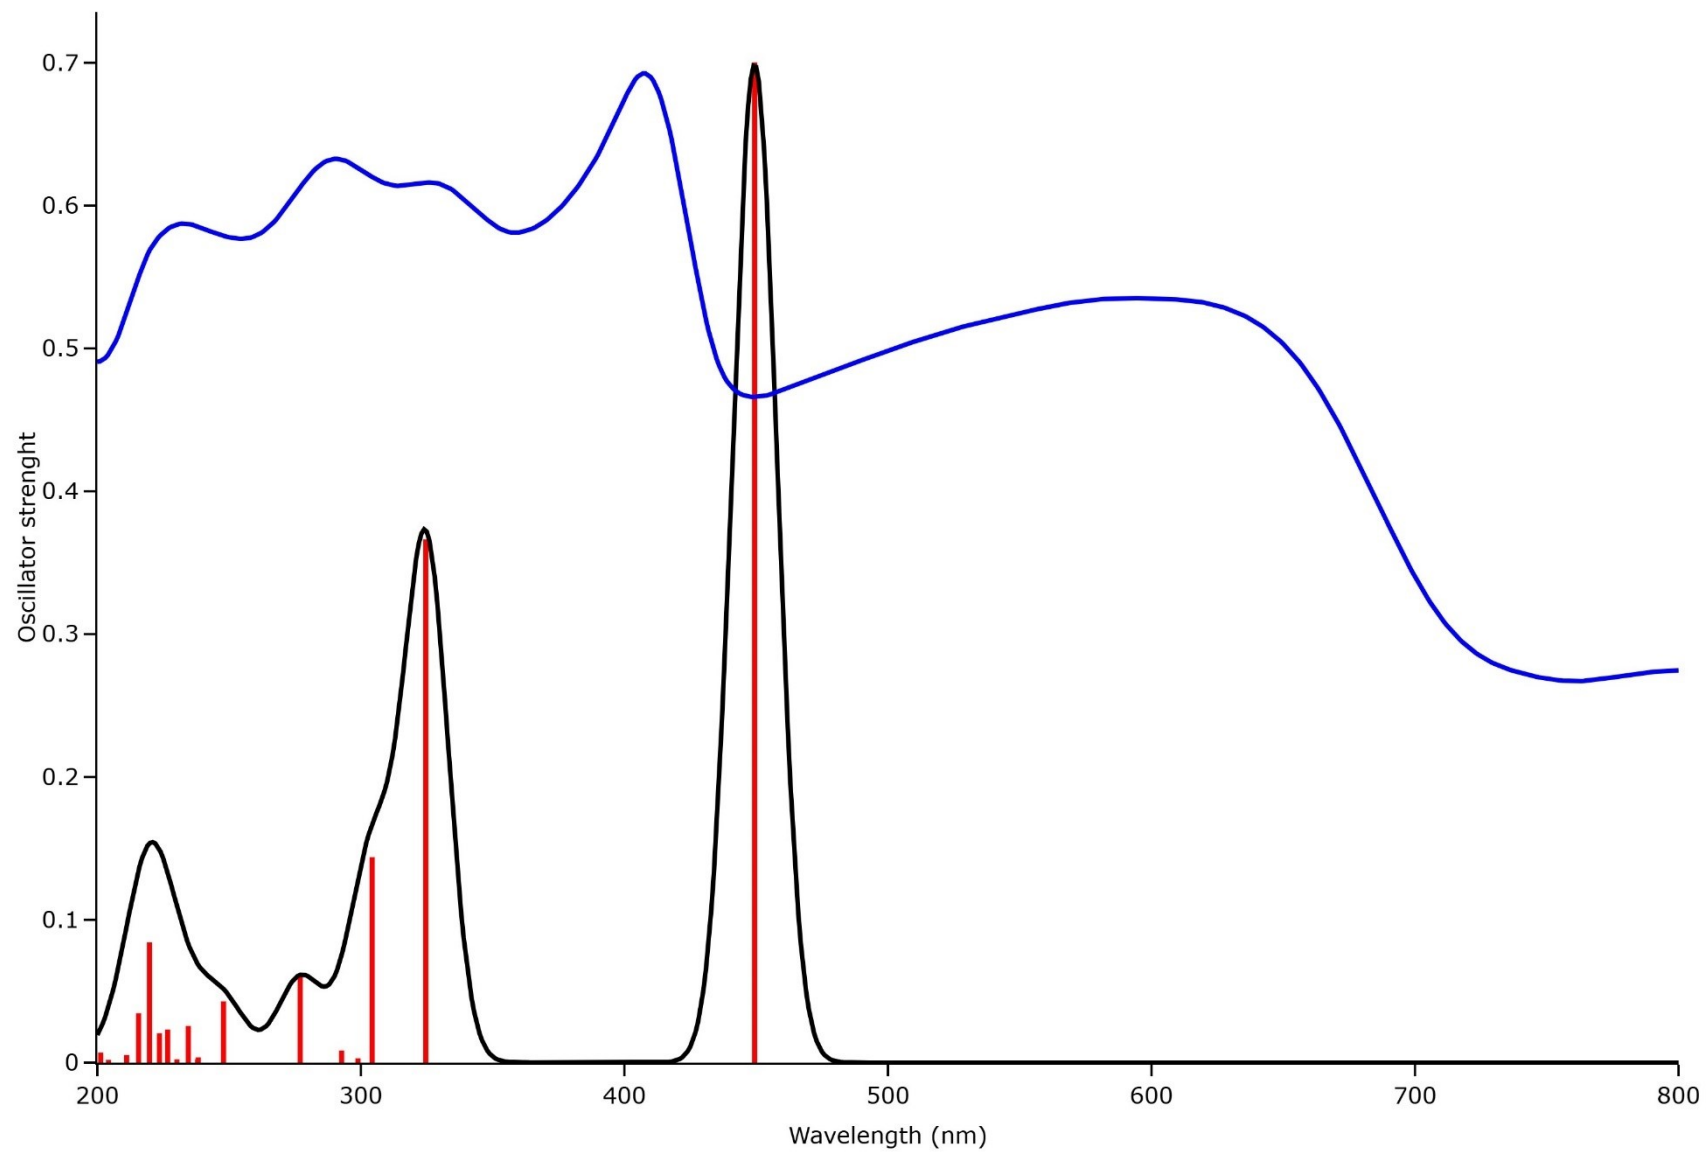

Figure S37. Experimental (blue) and calculated (black) UV-Vis spectrum of 7. Oscillator strengths are represented as vertical navy-red lines.

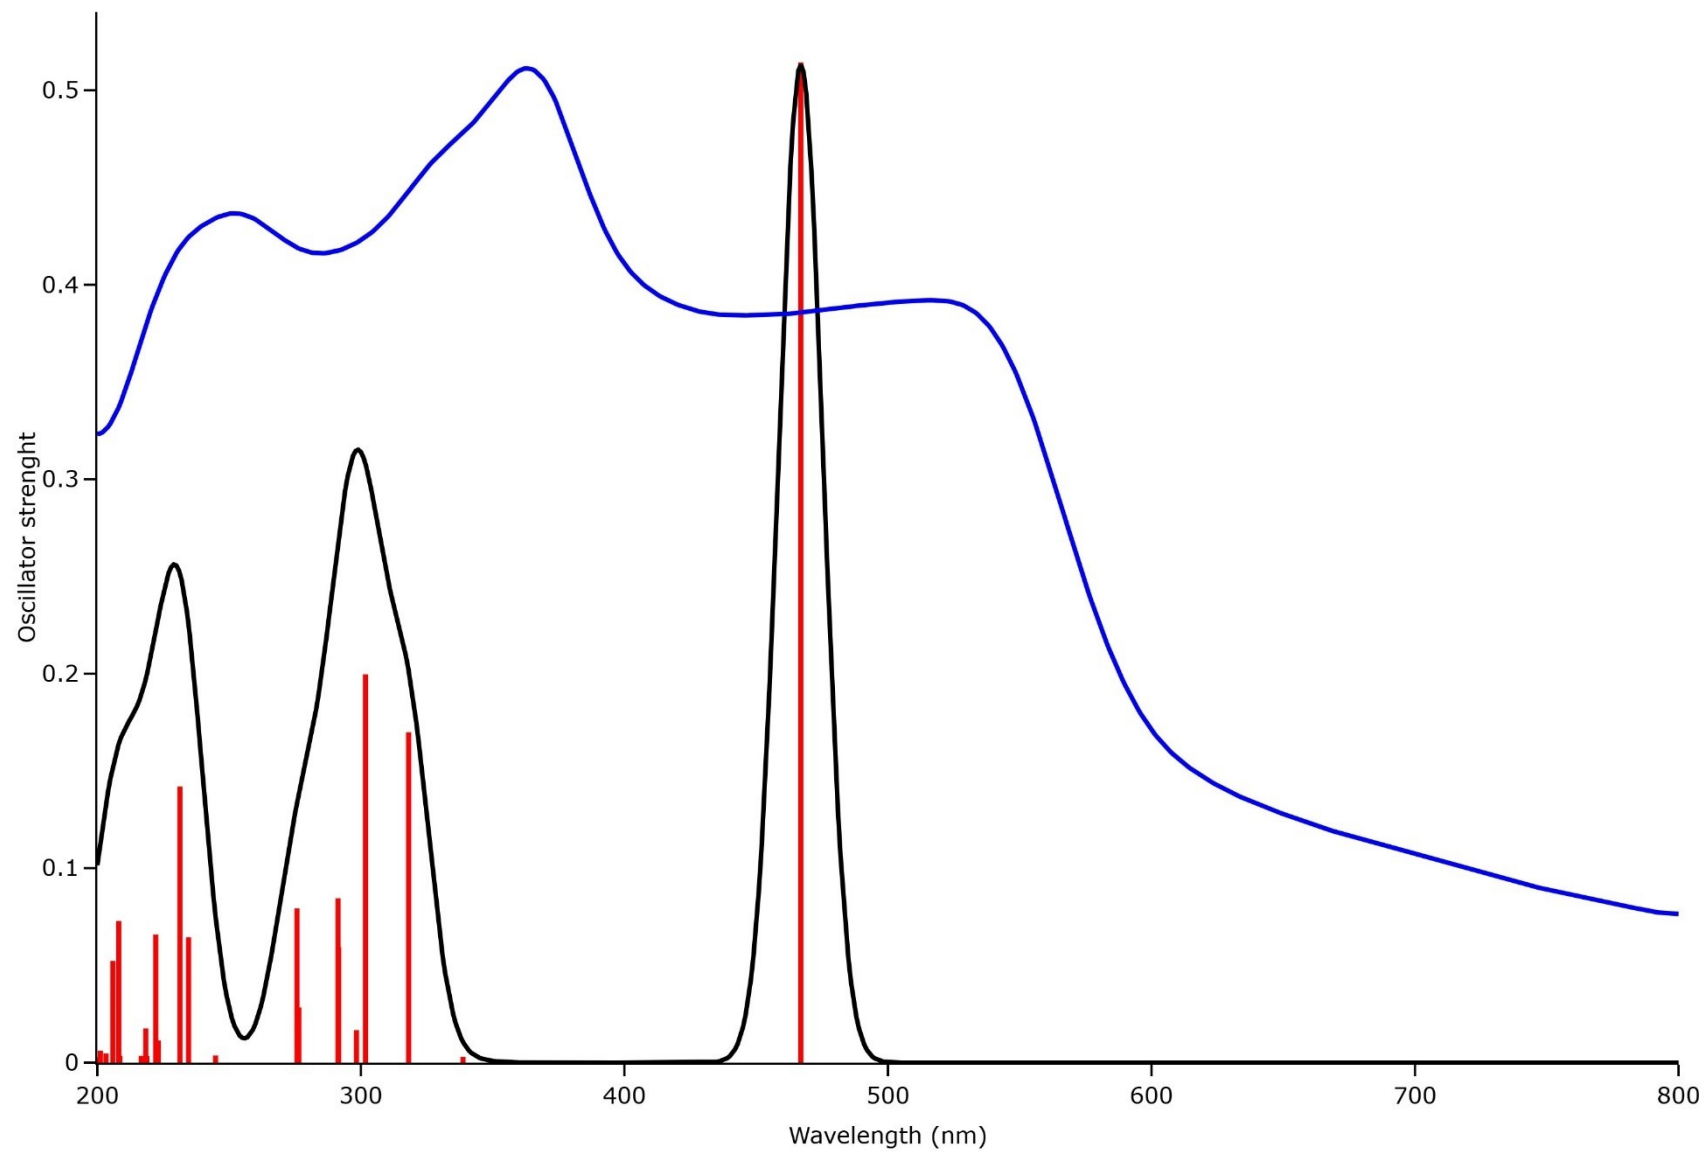

Figure S38. Experimental (blue) and calculated (black) UV-Vis spectrum of **8**. Oscillator strengths are represented as vertical navy-red lines.

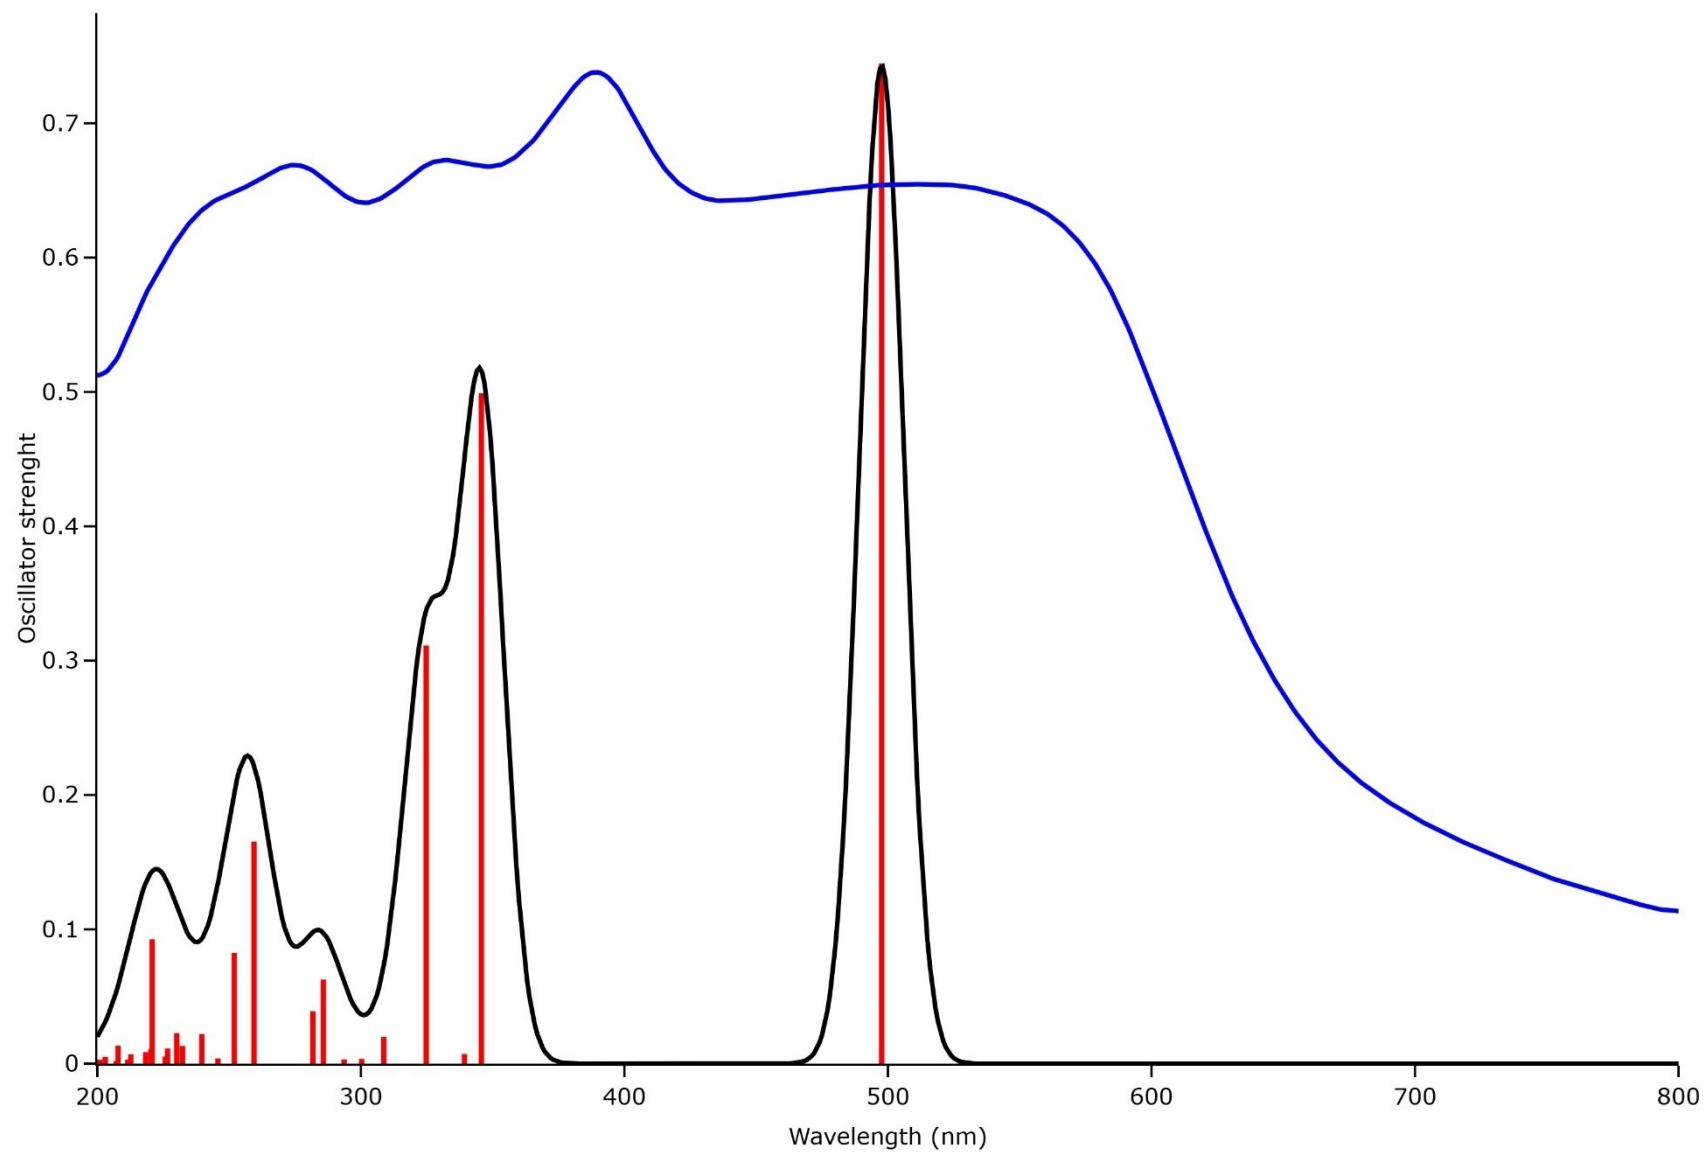

Figure S39. Experimental (blue) and calculated (black) UV-Vis spectrum of **9**. Oscillator strengths are represented as vertical navy-red lines.

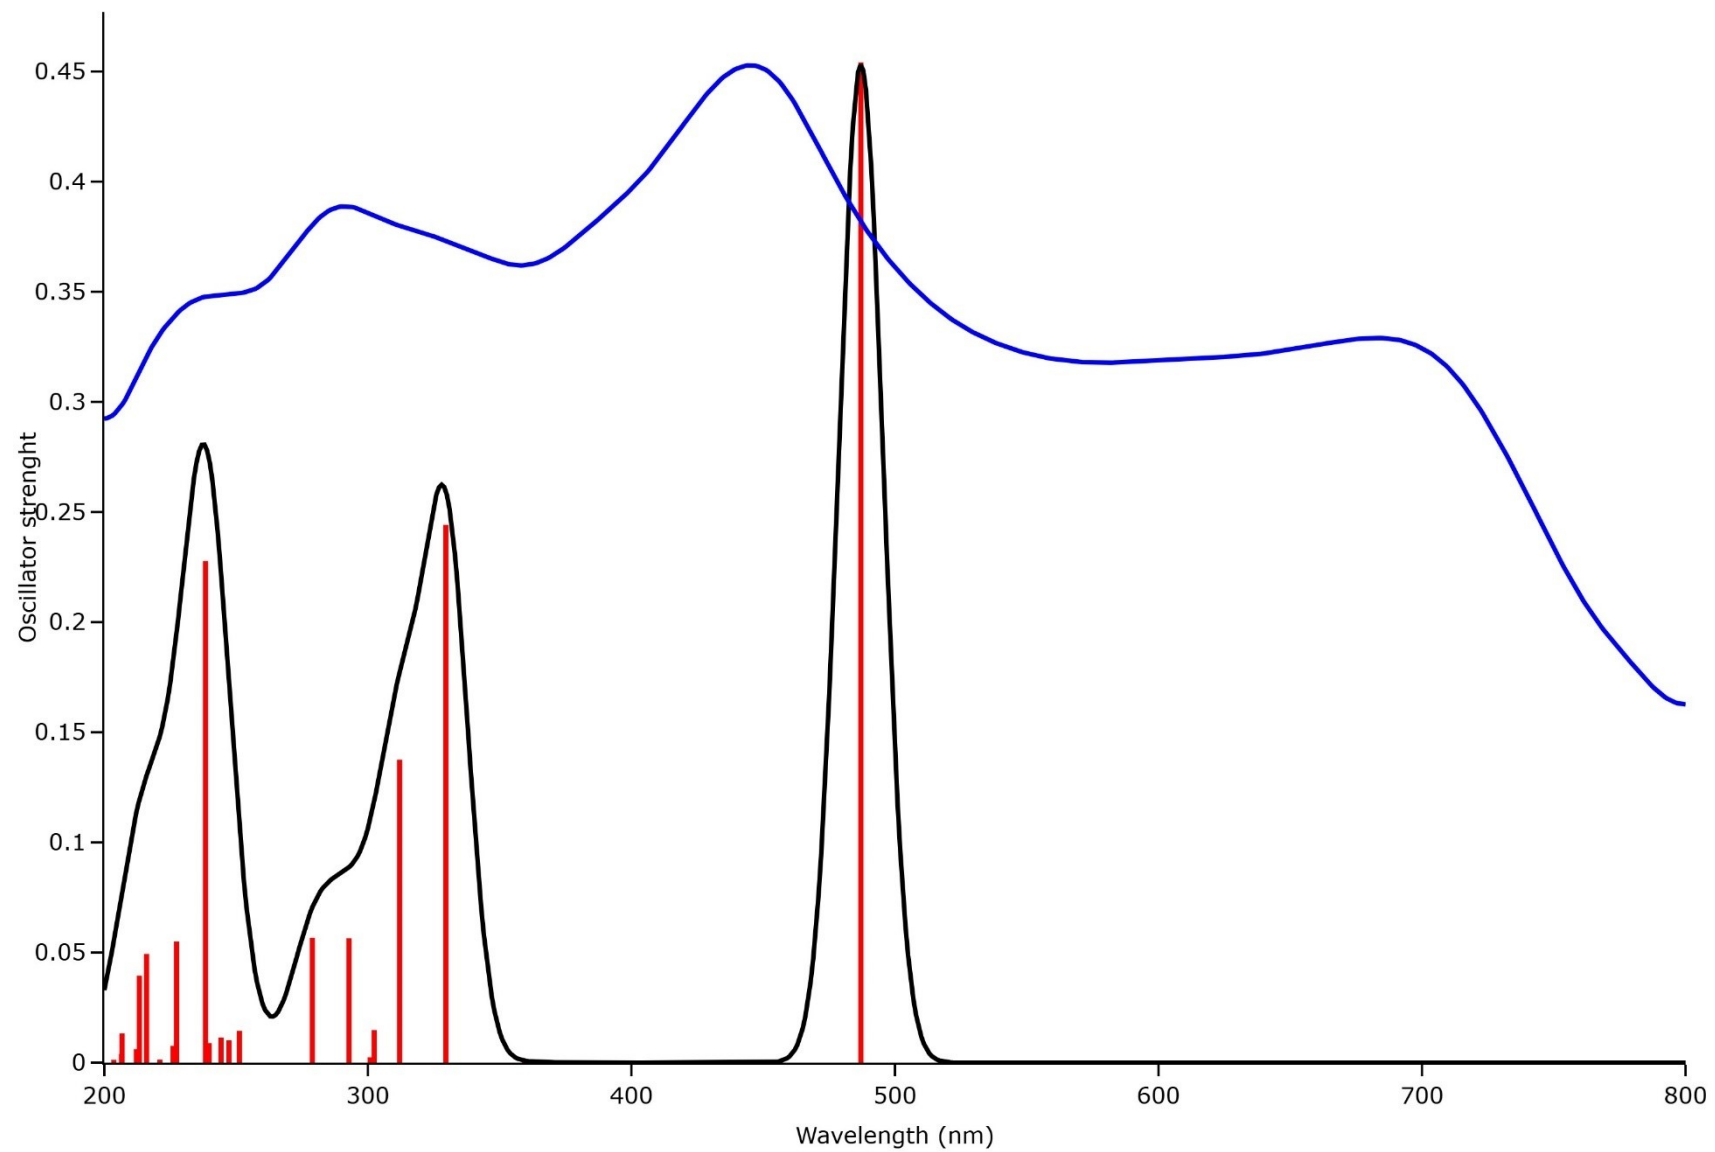

Figure S40. Experimental (blue) and calculated (black) UV-Vis spectrum of **10**. Oscillator strengths are represented as vertical navy-red lines.

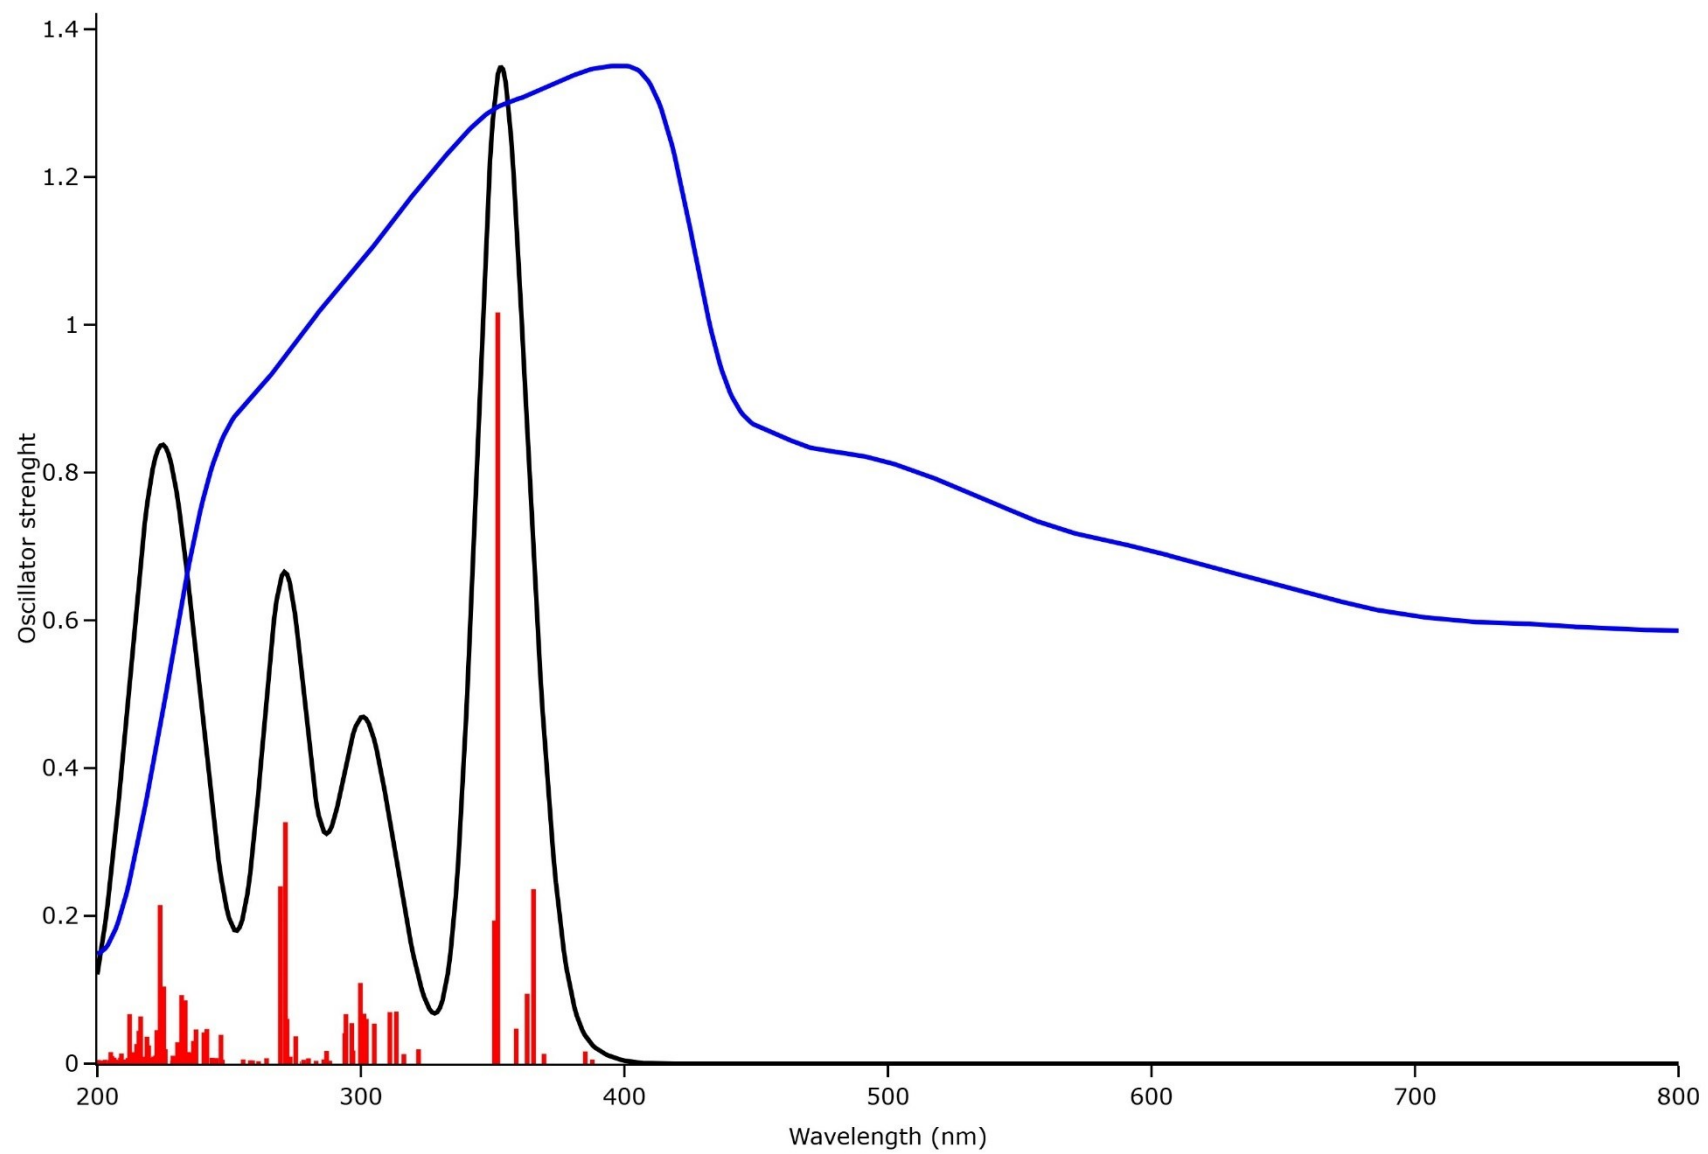

Figure S41. Experimental (blue) and calculated for 3 molecules (black) UV-Vis spectrum of **1**. Oscillator strengths are represented as vertical navy-red lines.

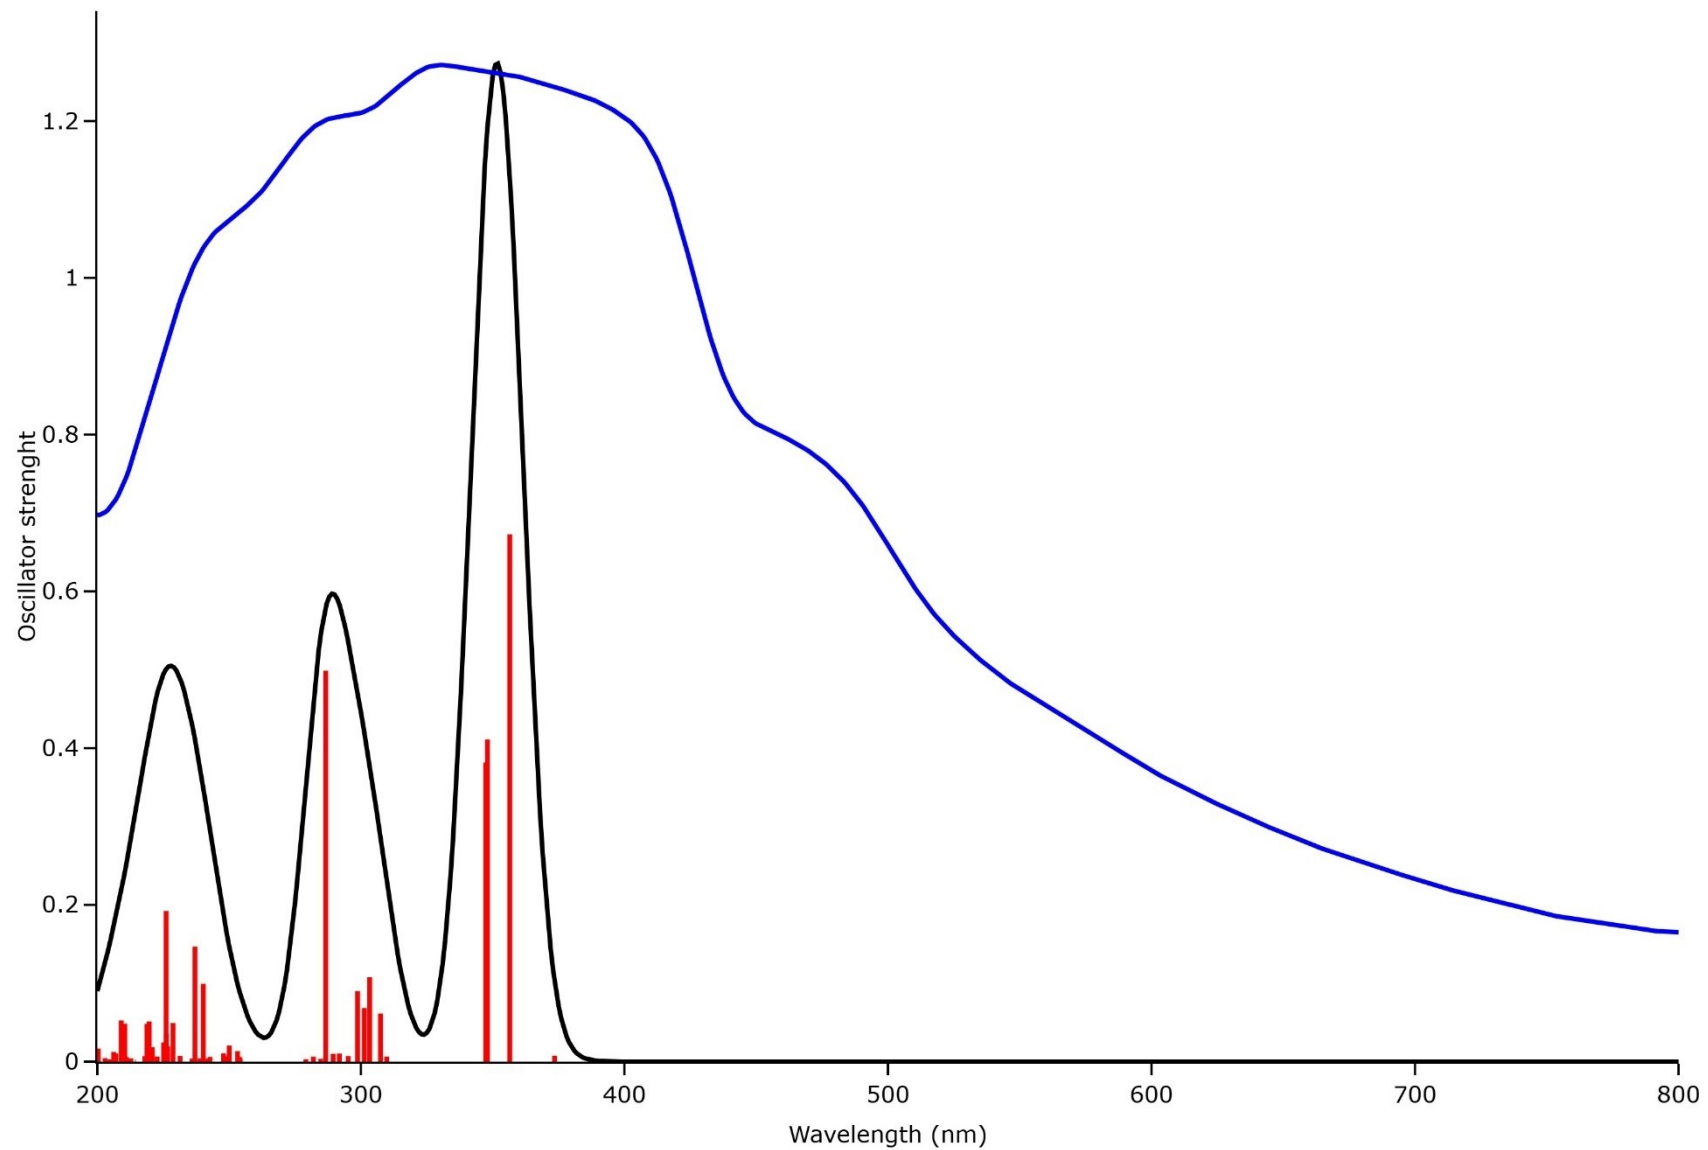

Figure S42. Experimental (blue) and calculated for 2 molecules (black) UV-Vis spectrum of **2**. Oscillator strengths are represented as vertical navy-red lines.

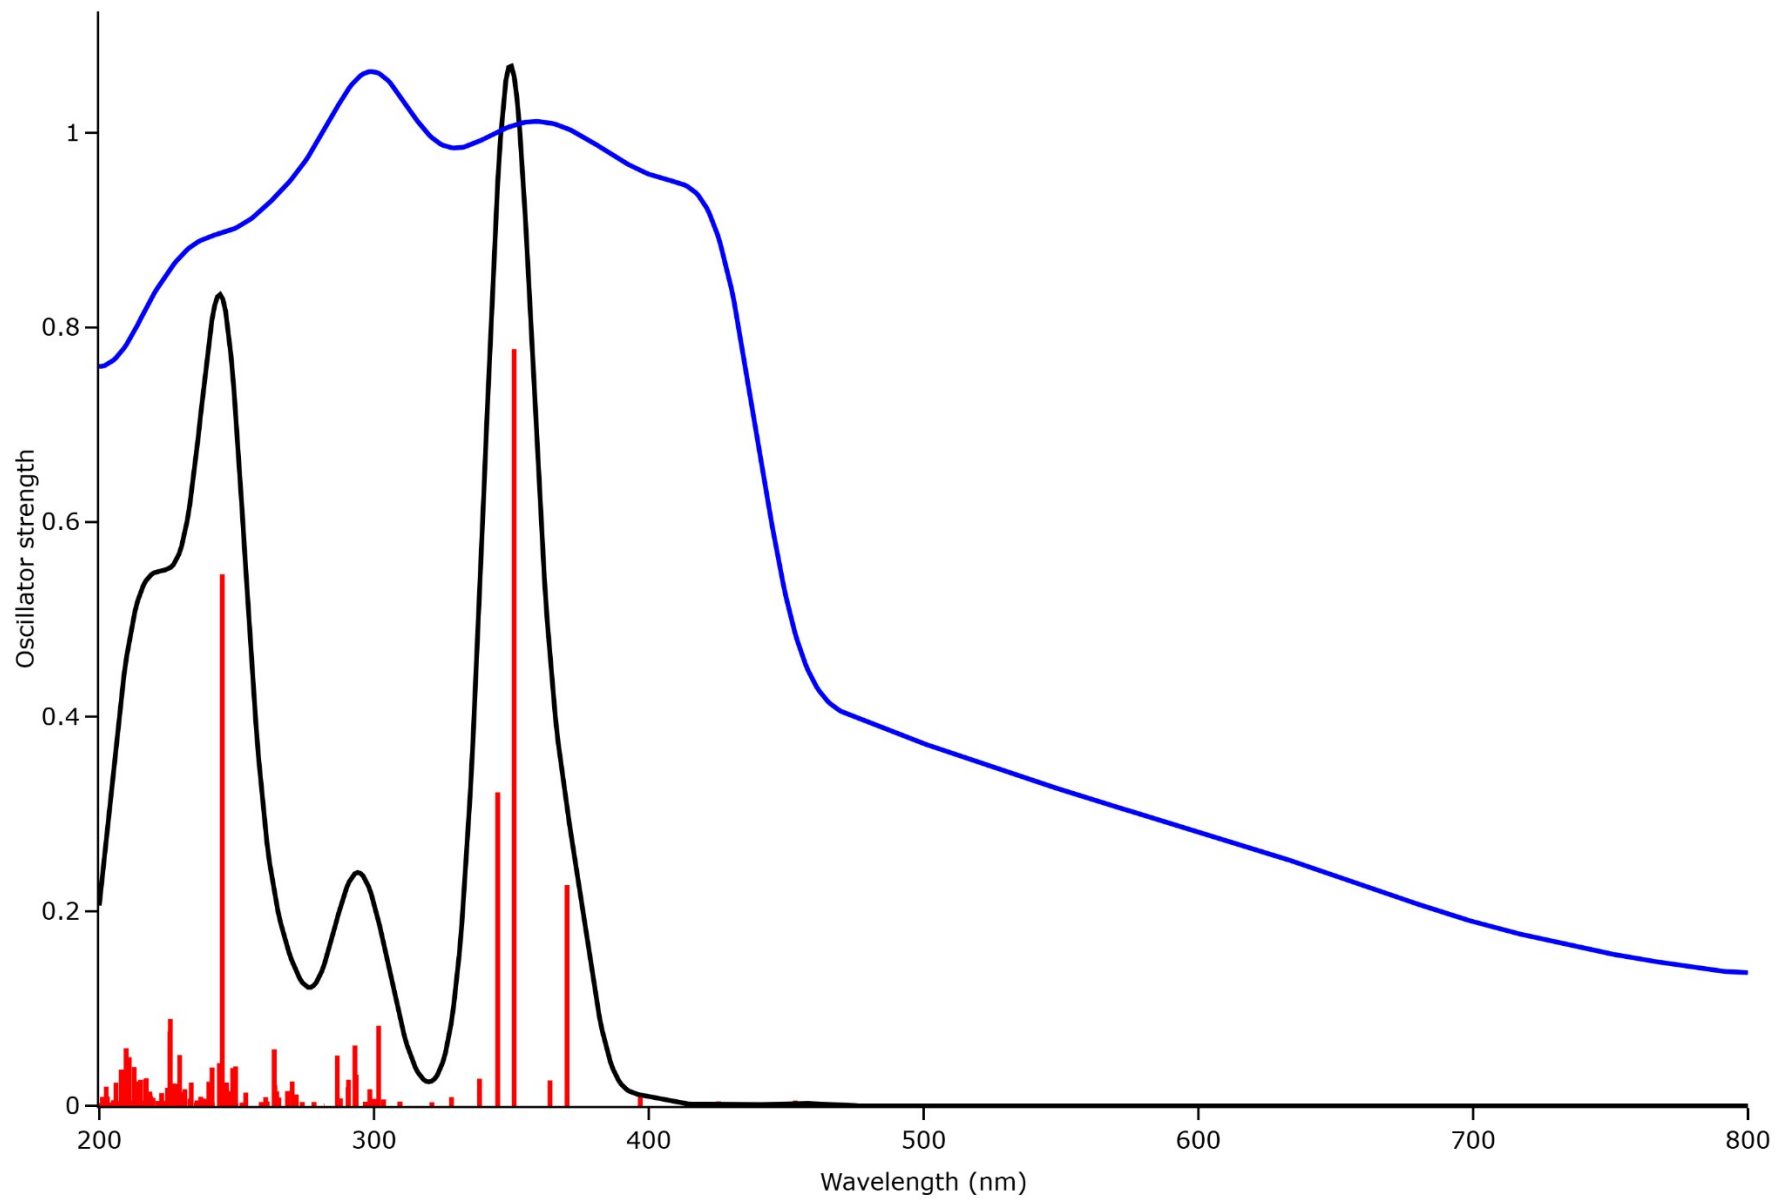

Figure S43. Experimental (blue) and calculated for 3 molecules (black) UV-Vis spectrum of **3**. Oscillator strengths are represented as vertical navy-red lines.

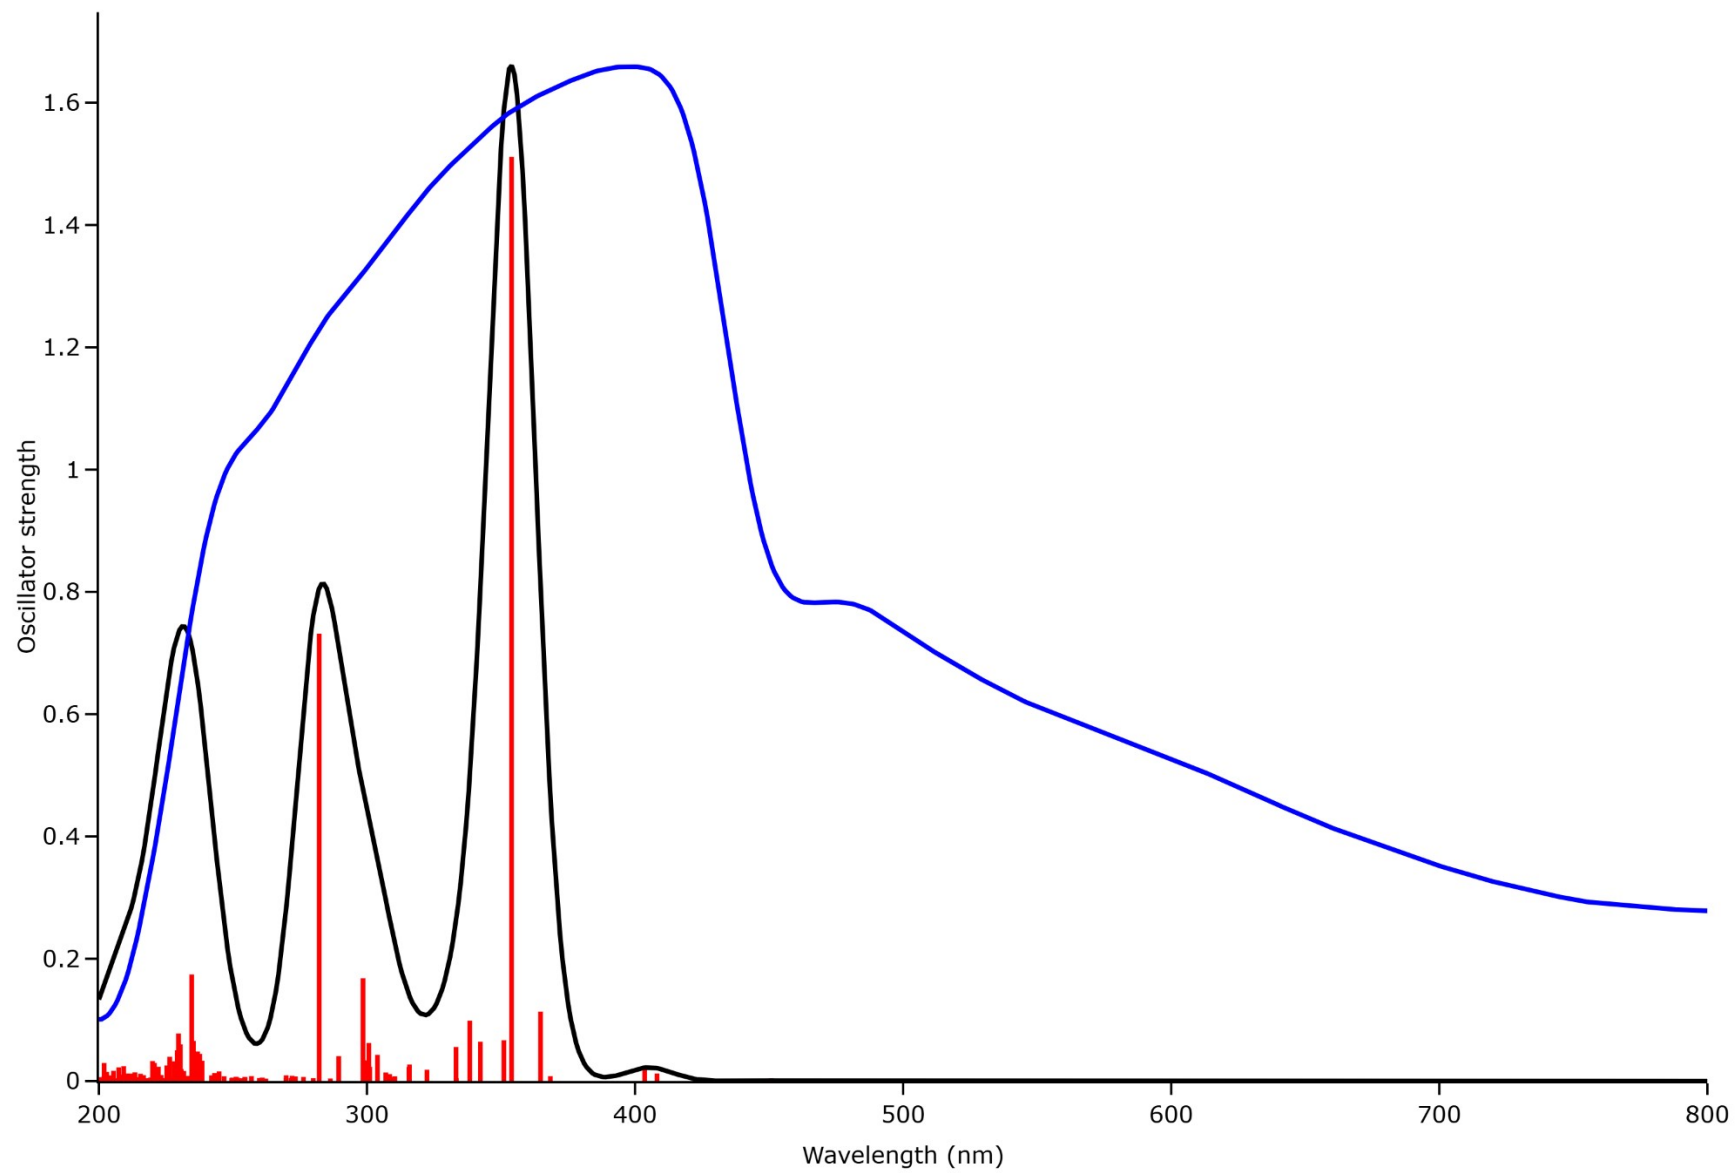

Figure S44. Experimental (blue) and calculated for 3 molecules (black) UV-Vis spectrum of **4**. Oscillator strengths are represented as vertical navy-red lines.



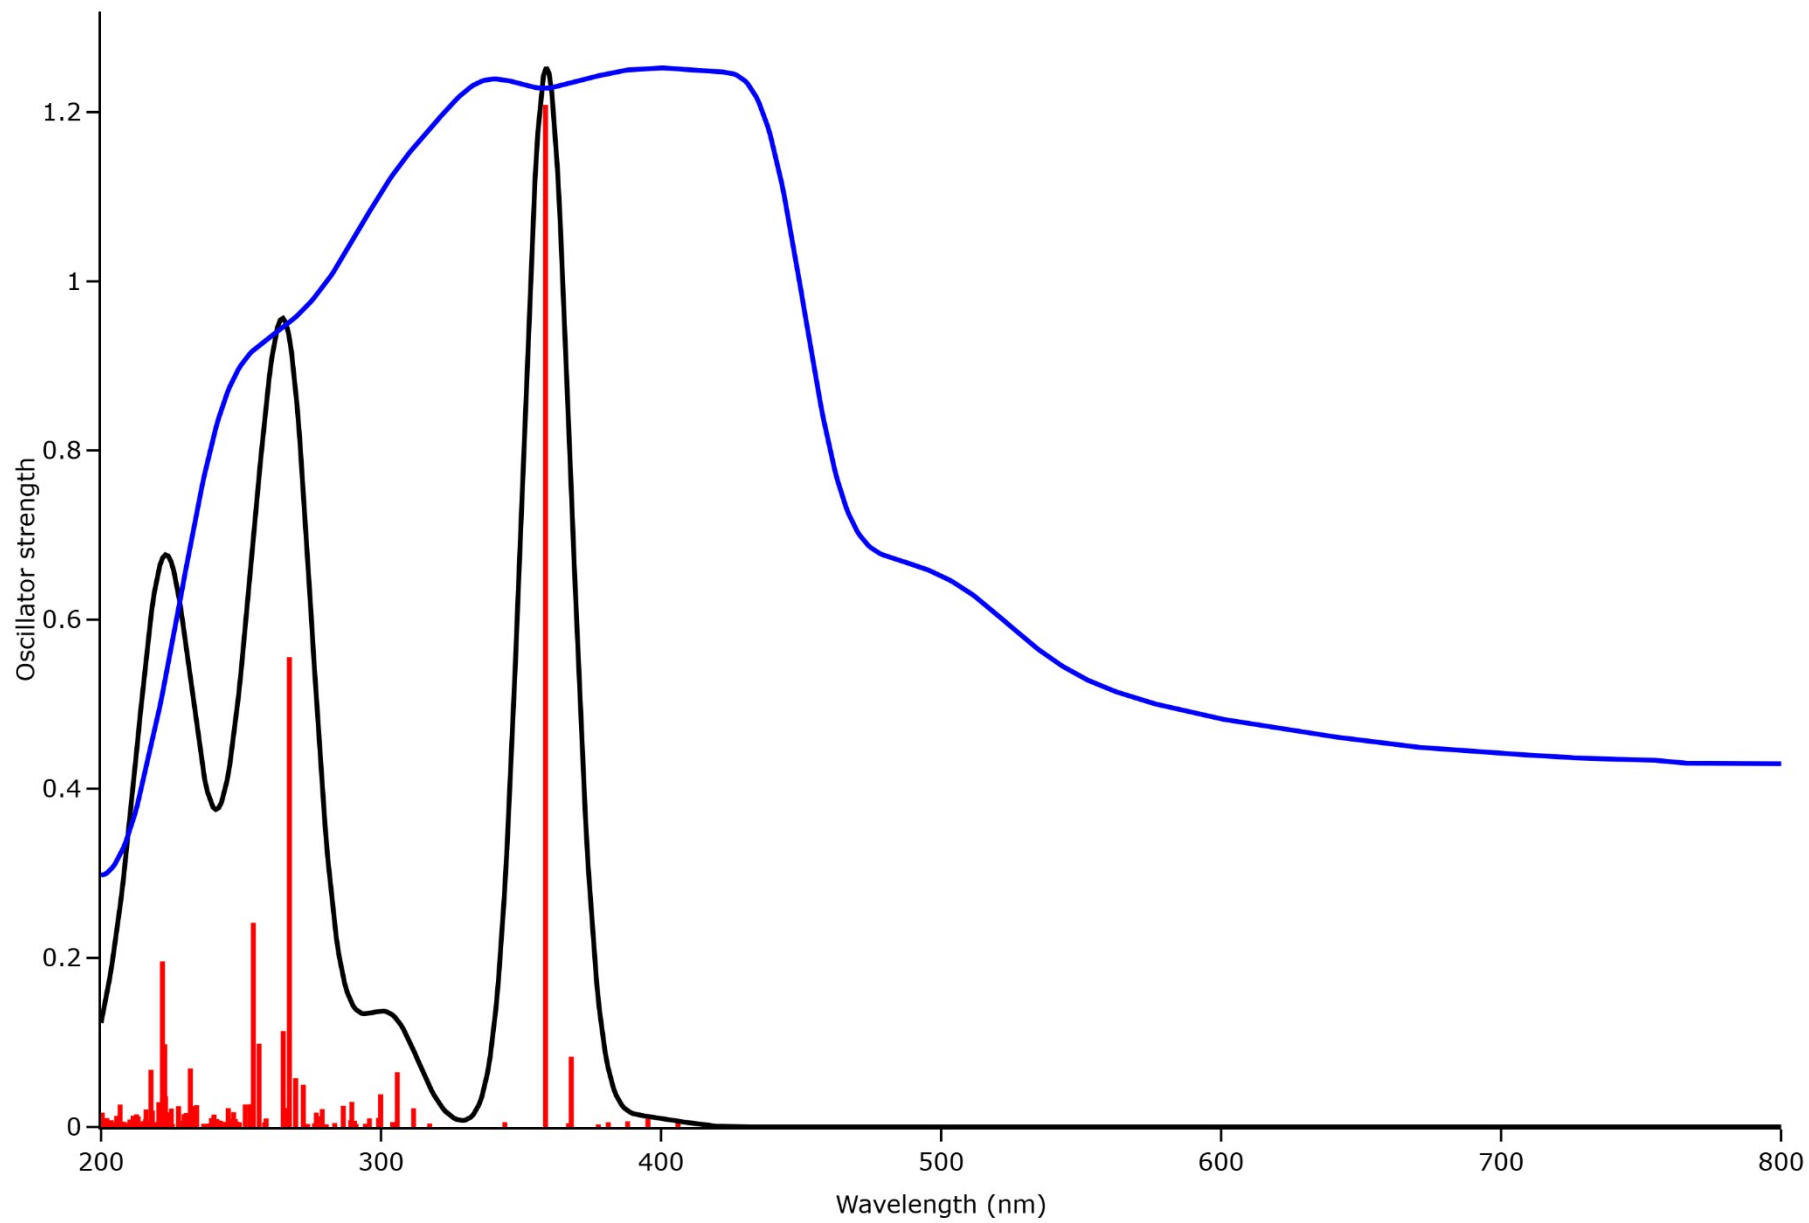

Figure S45. Experimental (blue) and calculated for 3 molecules (black) UV-Vis spectrum of **5**. Oscillator strengths are represented as vertical navy-red lines.

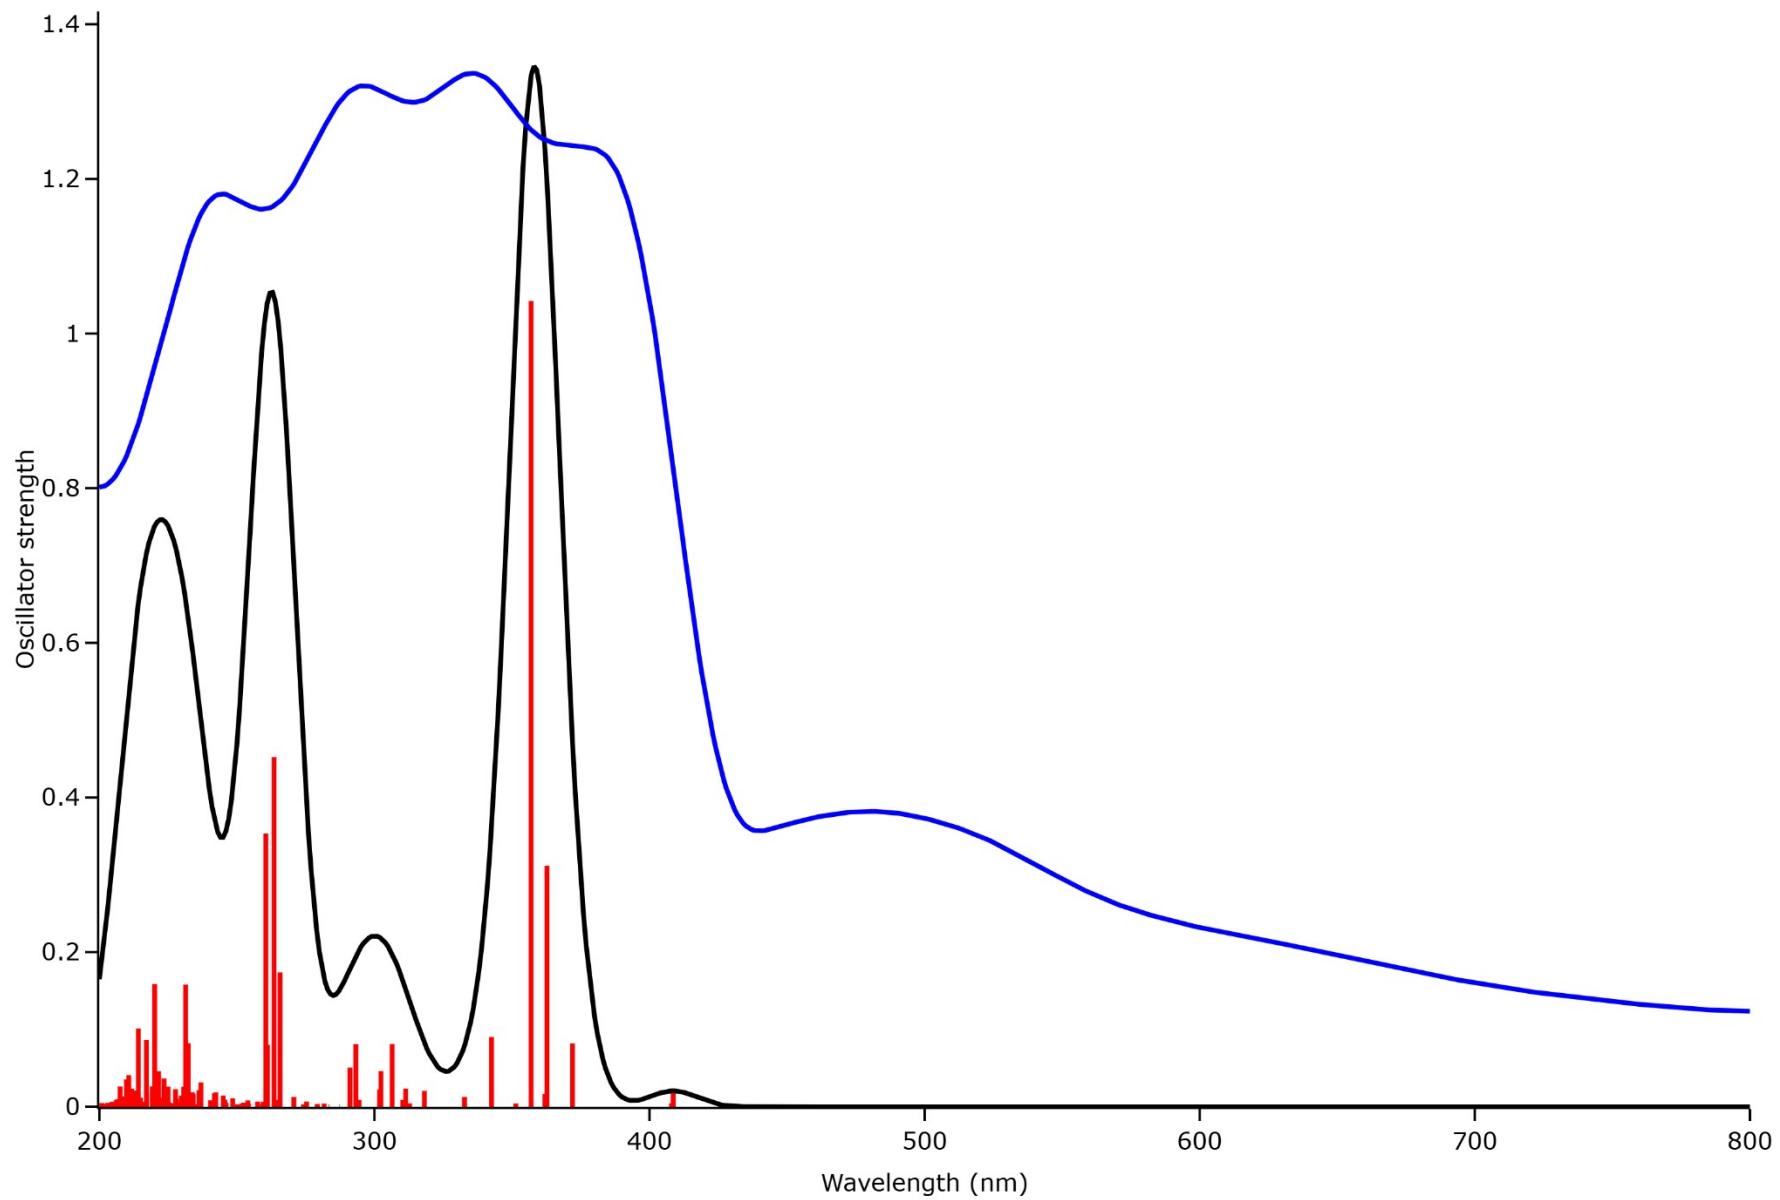

Figure S46. Experimental (blue) and calculated for 3 molecules (black) UV-Vis spectrum of **6**. Oscillator strengths are represented as vertical navy-red lines.

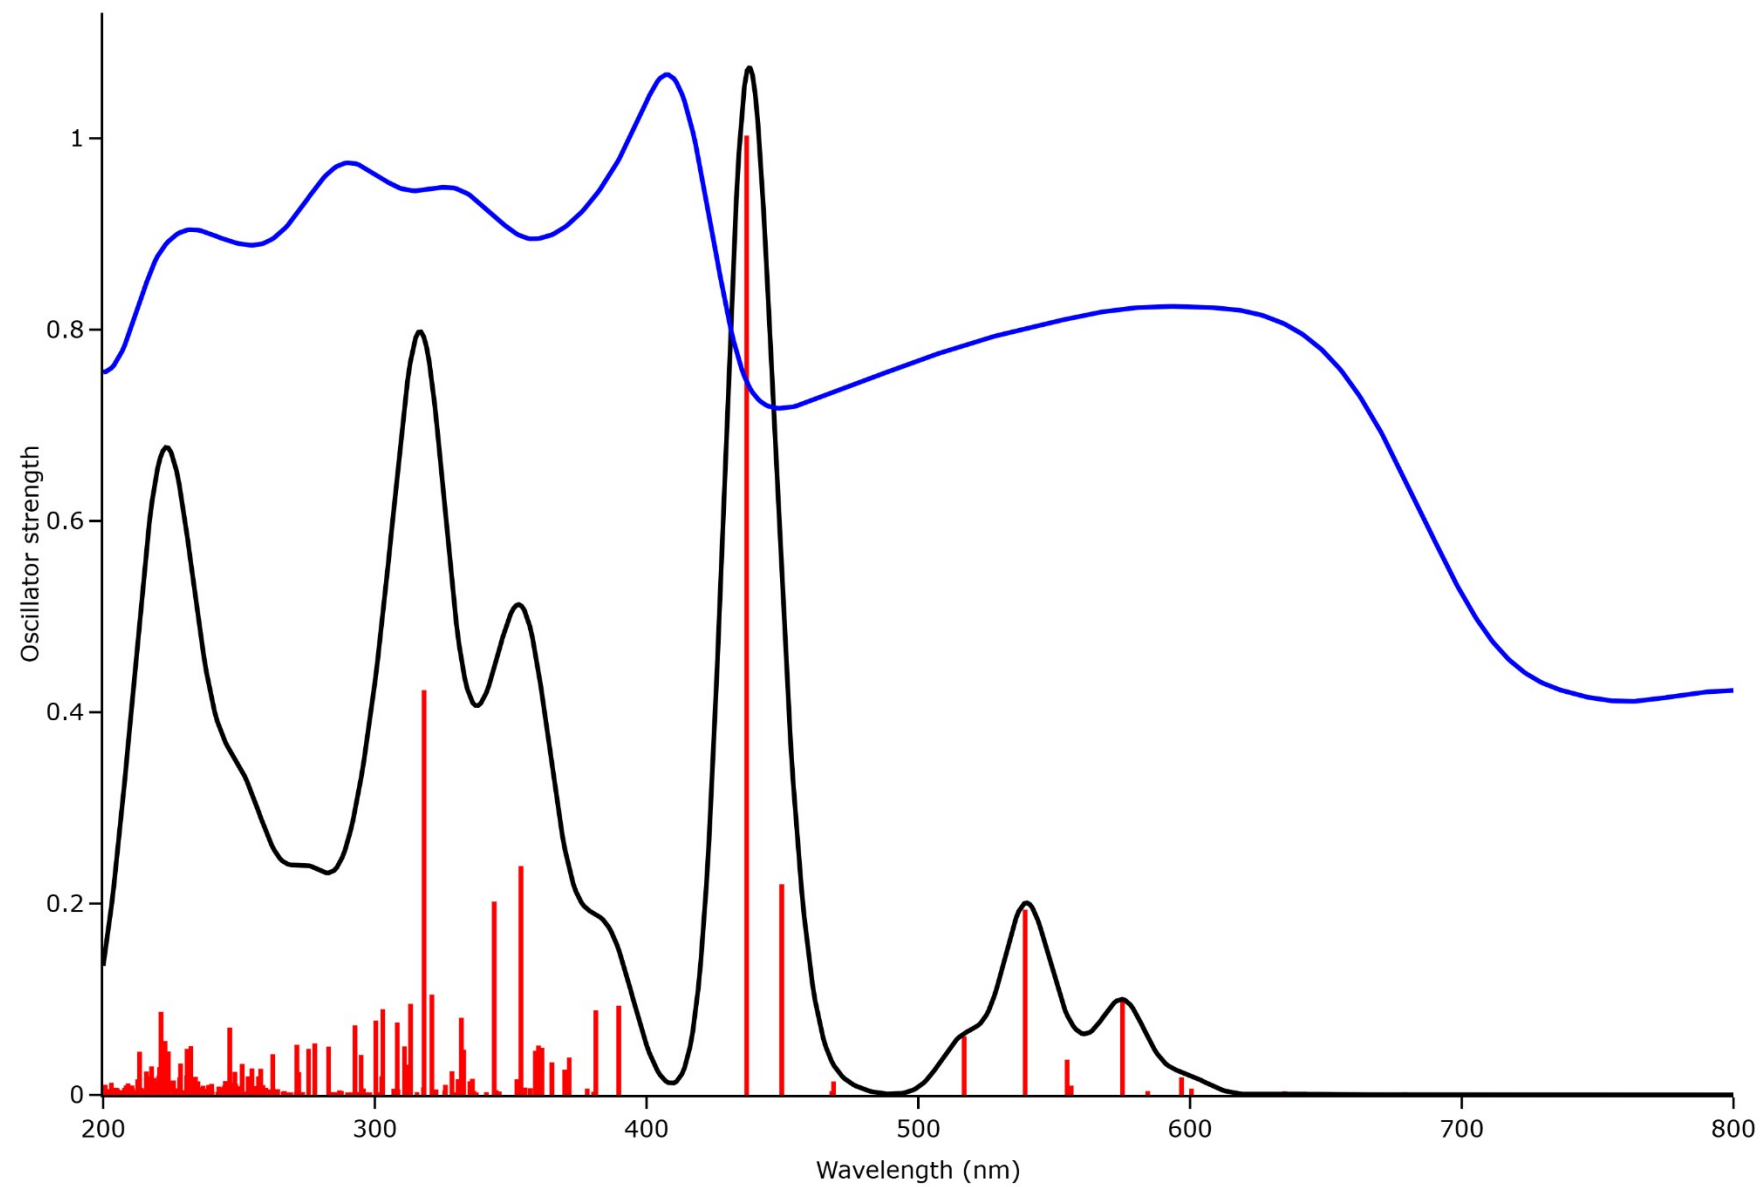

Figure S47. Experimental (blue) and calculated for 4 molecules (black) UV-Vis spectrum of 7. Oscillator strengths are represented as vertical navy-red lines.

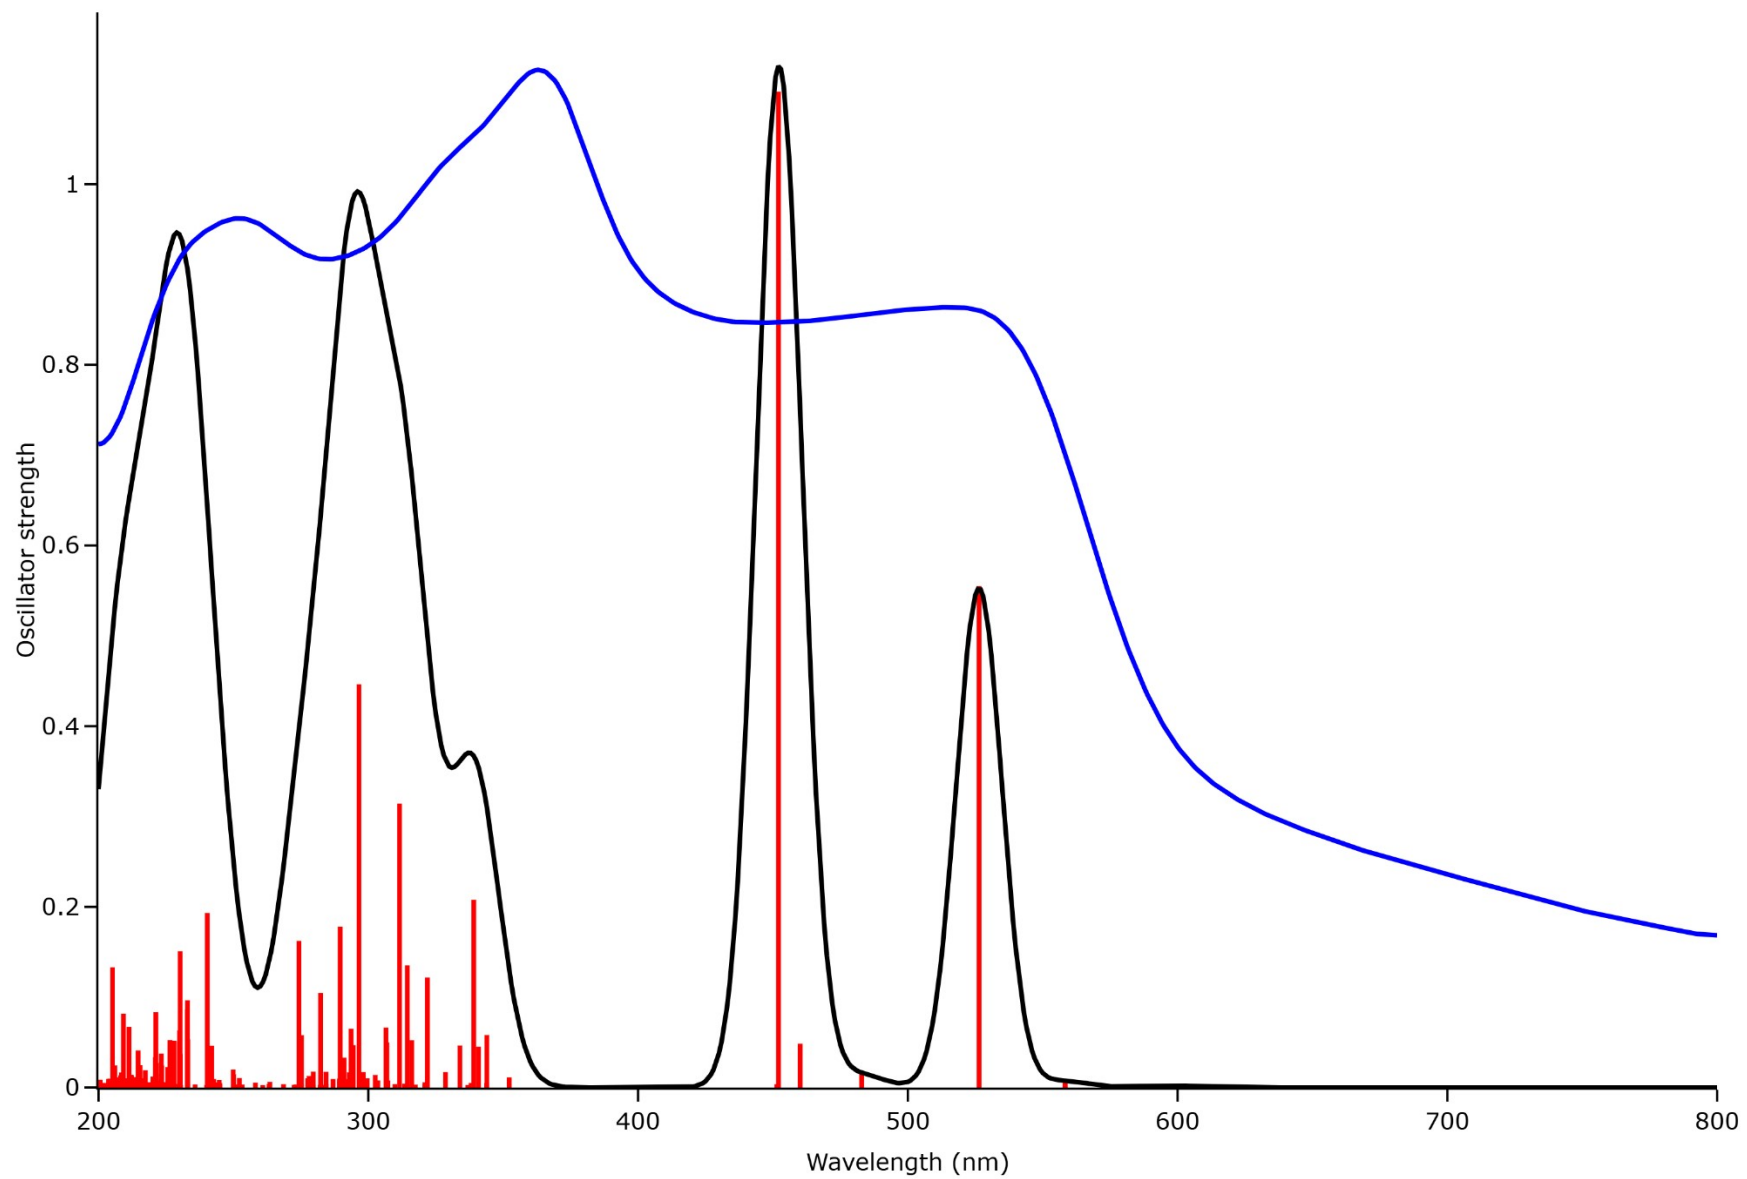

Figure S48. Experimental (blue) and calculated for 4 molecules (black) UV-Vis spectrum of **8**. Oscillator strengths are represented as vertical navy-red lines.

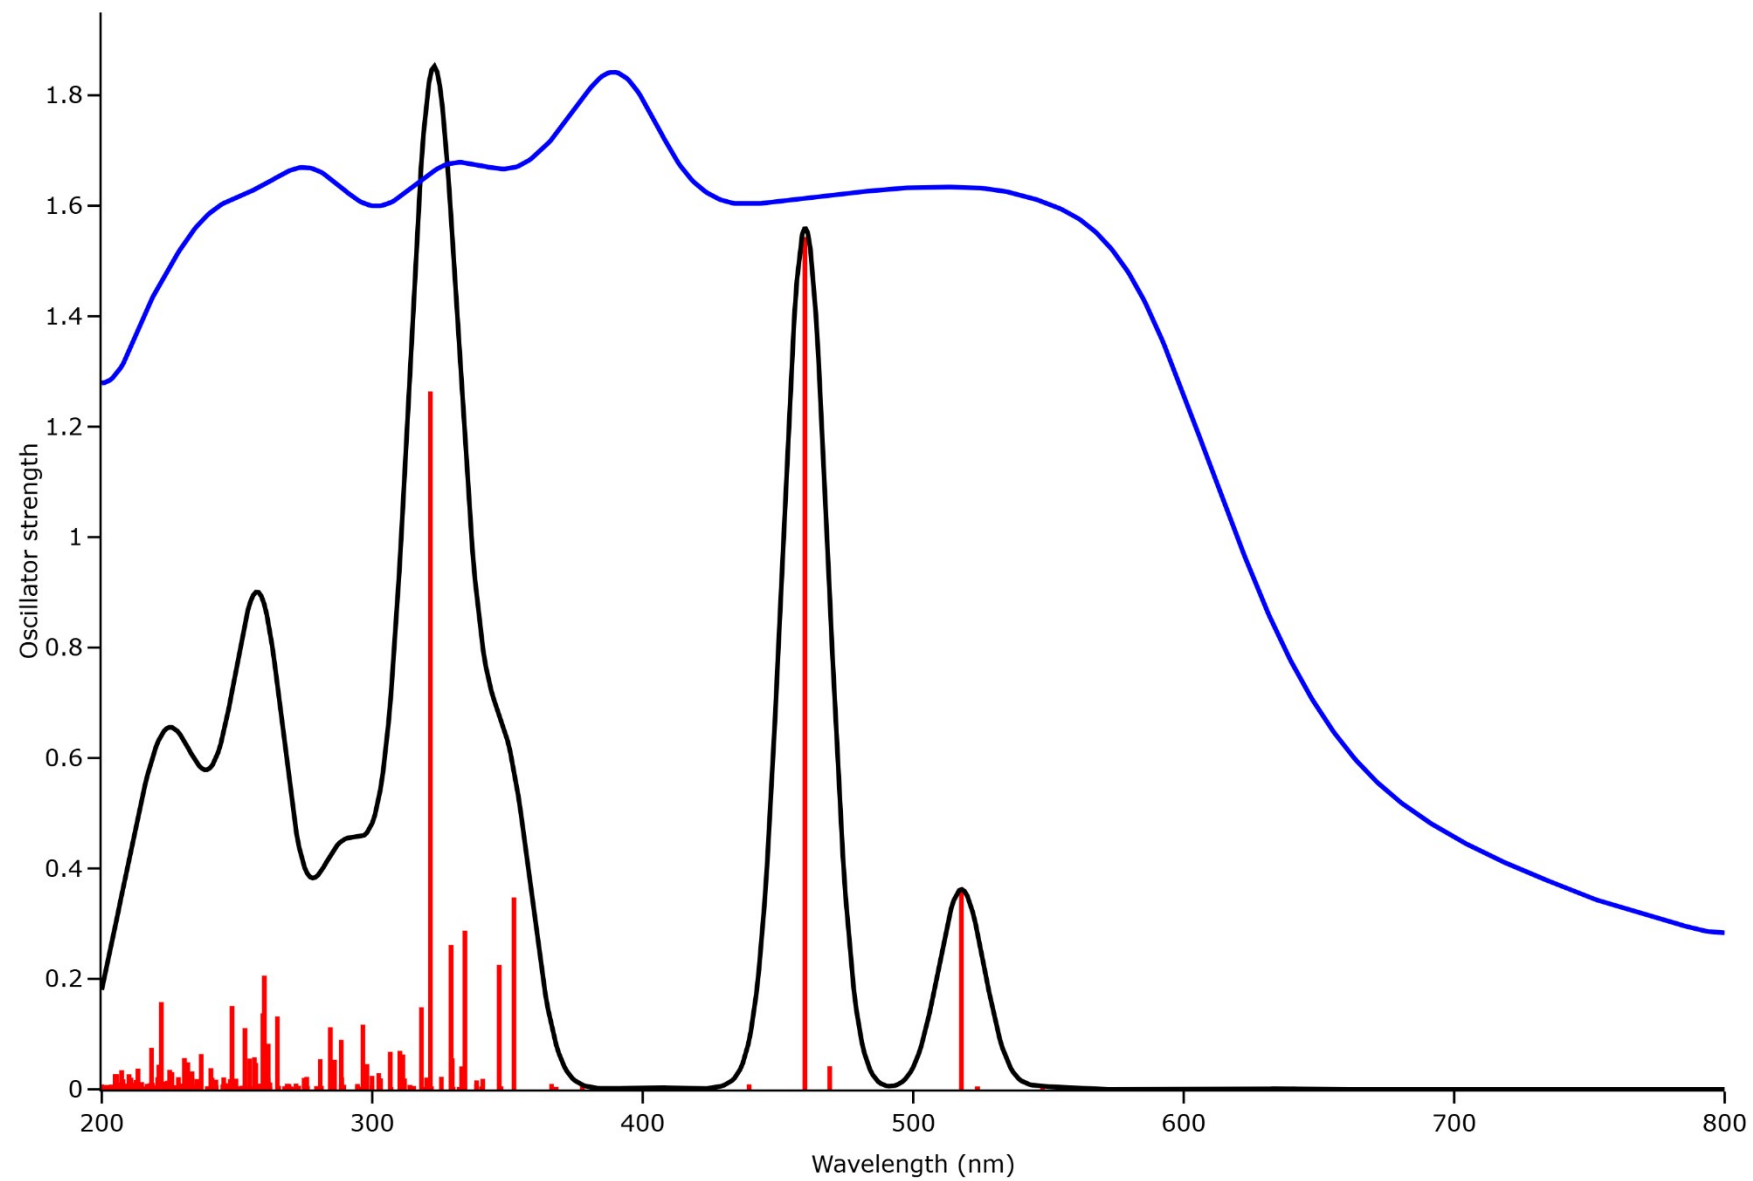

Figure S49. Experimental (blue) and calculated for 4 molecules (black) UV-Vis spectrum of **9**. Oscillator strengths are represented as vertical navy-red lines.

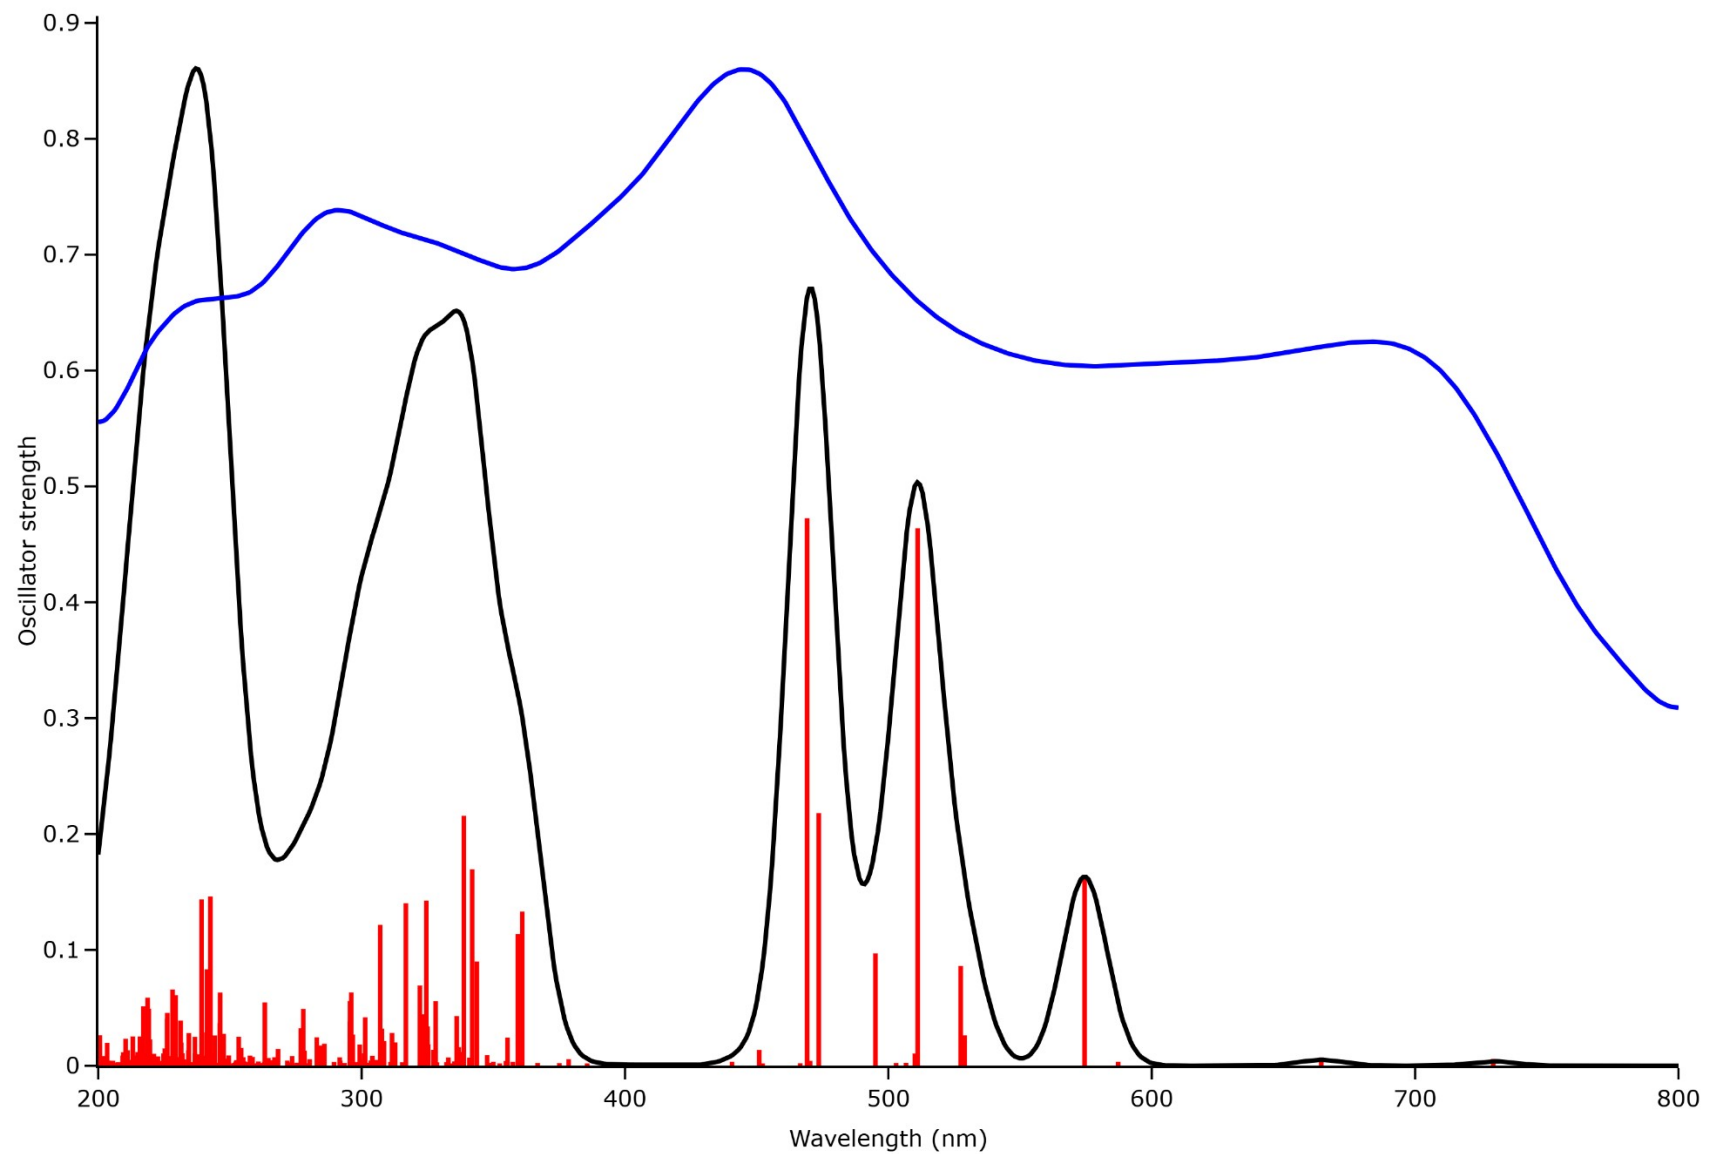

Figure S50. Experimental (blue) and calculated for 4 molecules (black) UV-Vis spectrum of **10**. Oscillator strengths are represented as vertical navy-red lines.

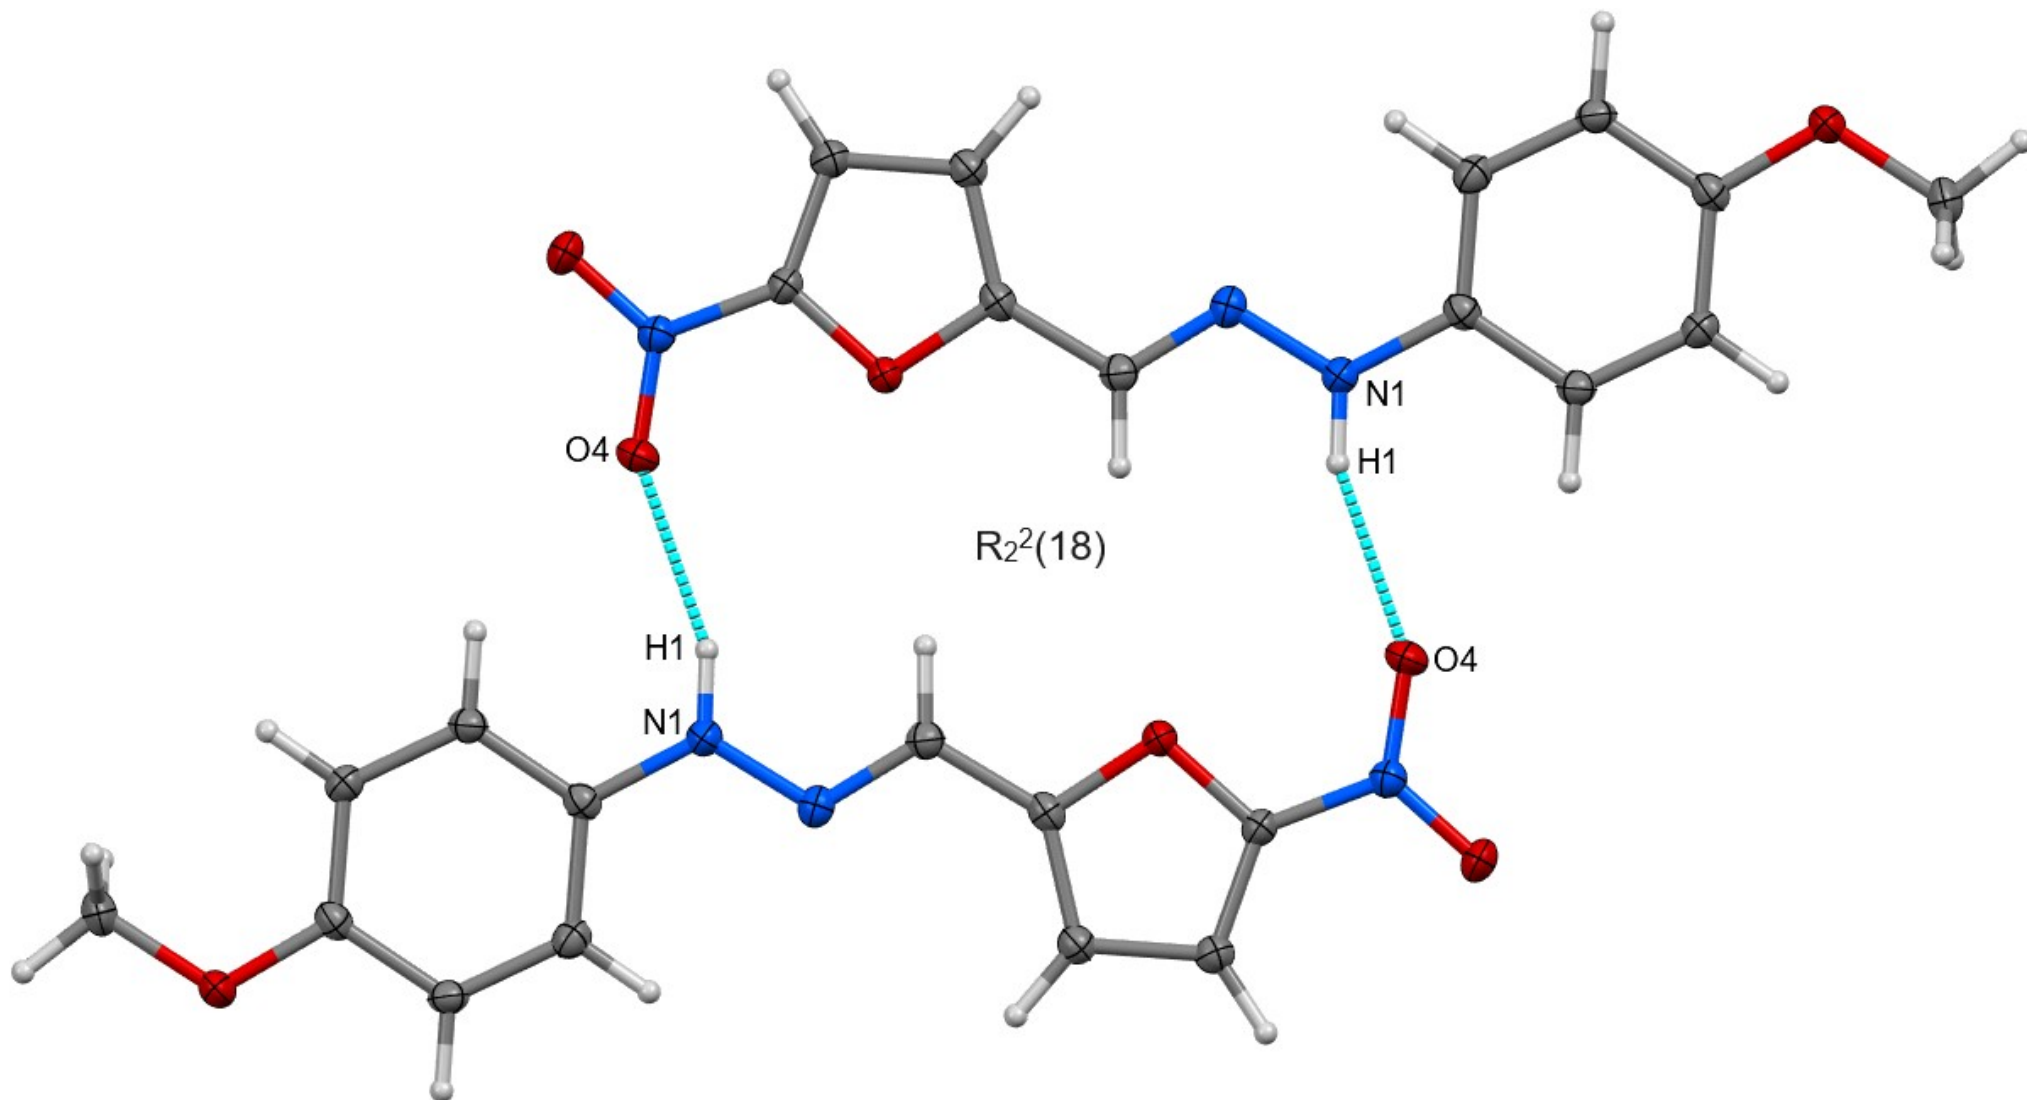

Figures S51. Hydrogen bond ring motif in the structure of 7.

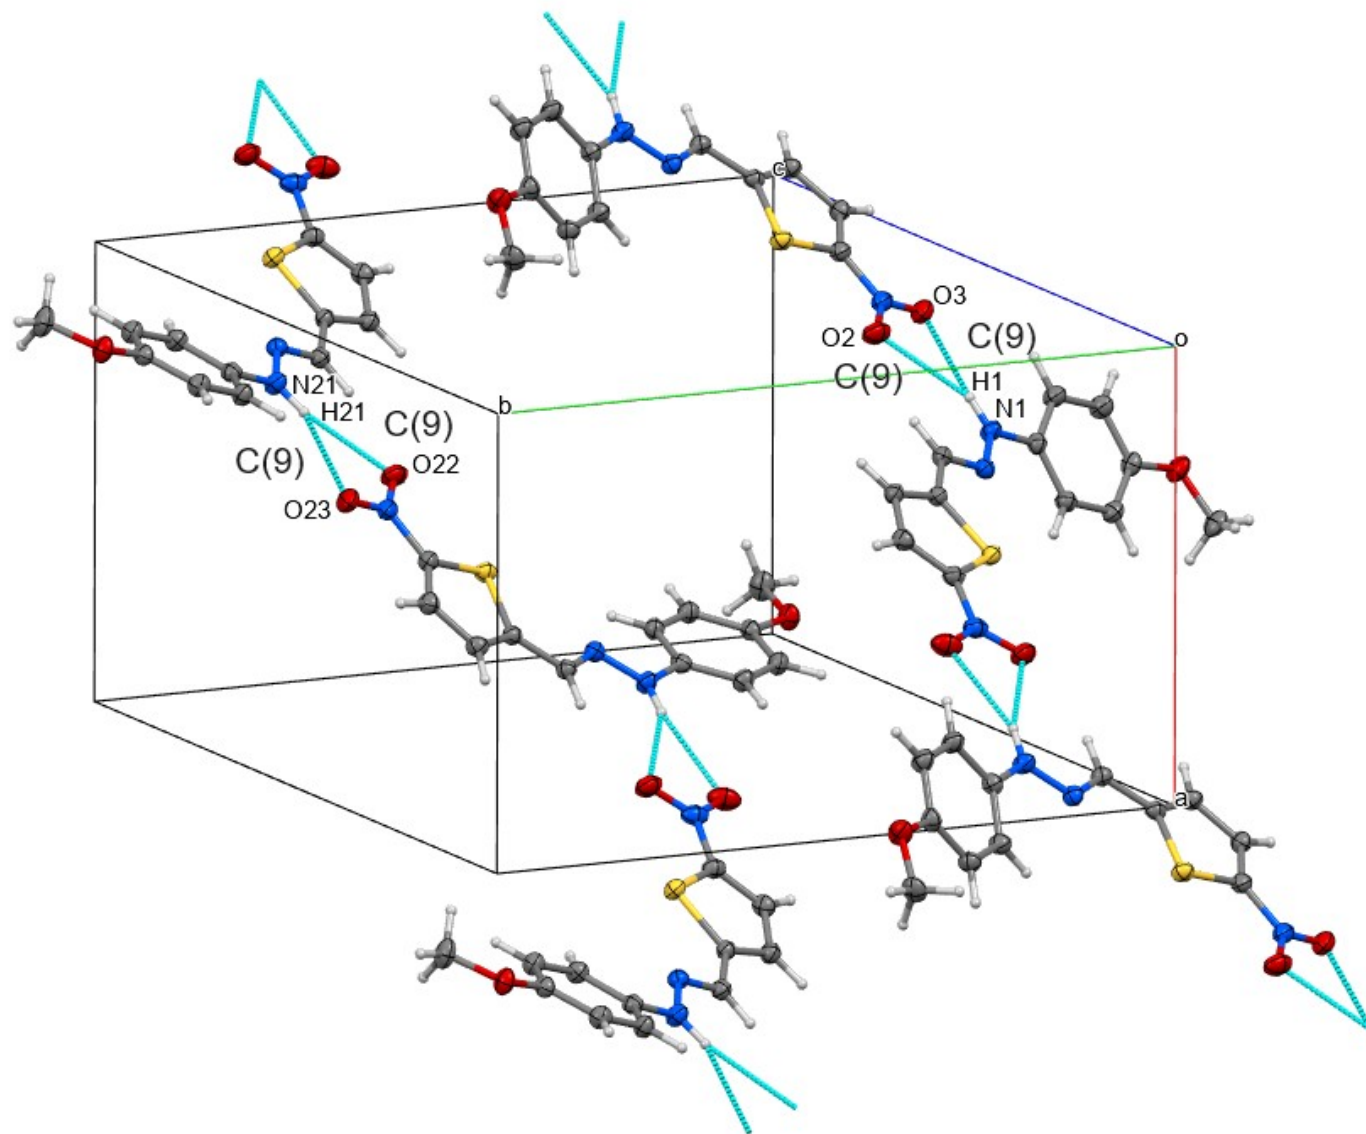

Figure S52. Hydrogen bond system in the structure of **10**.



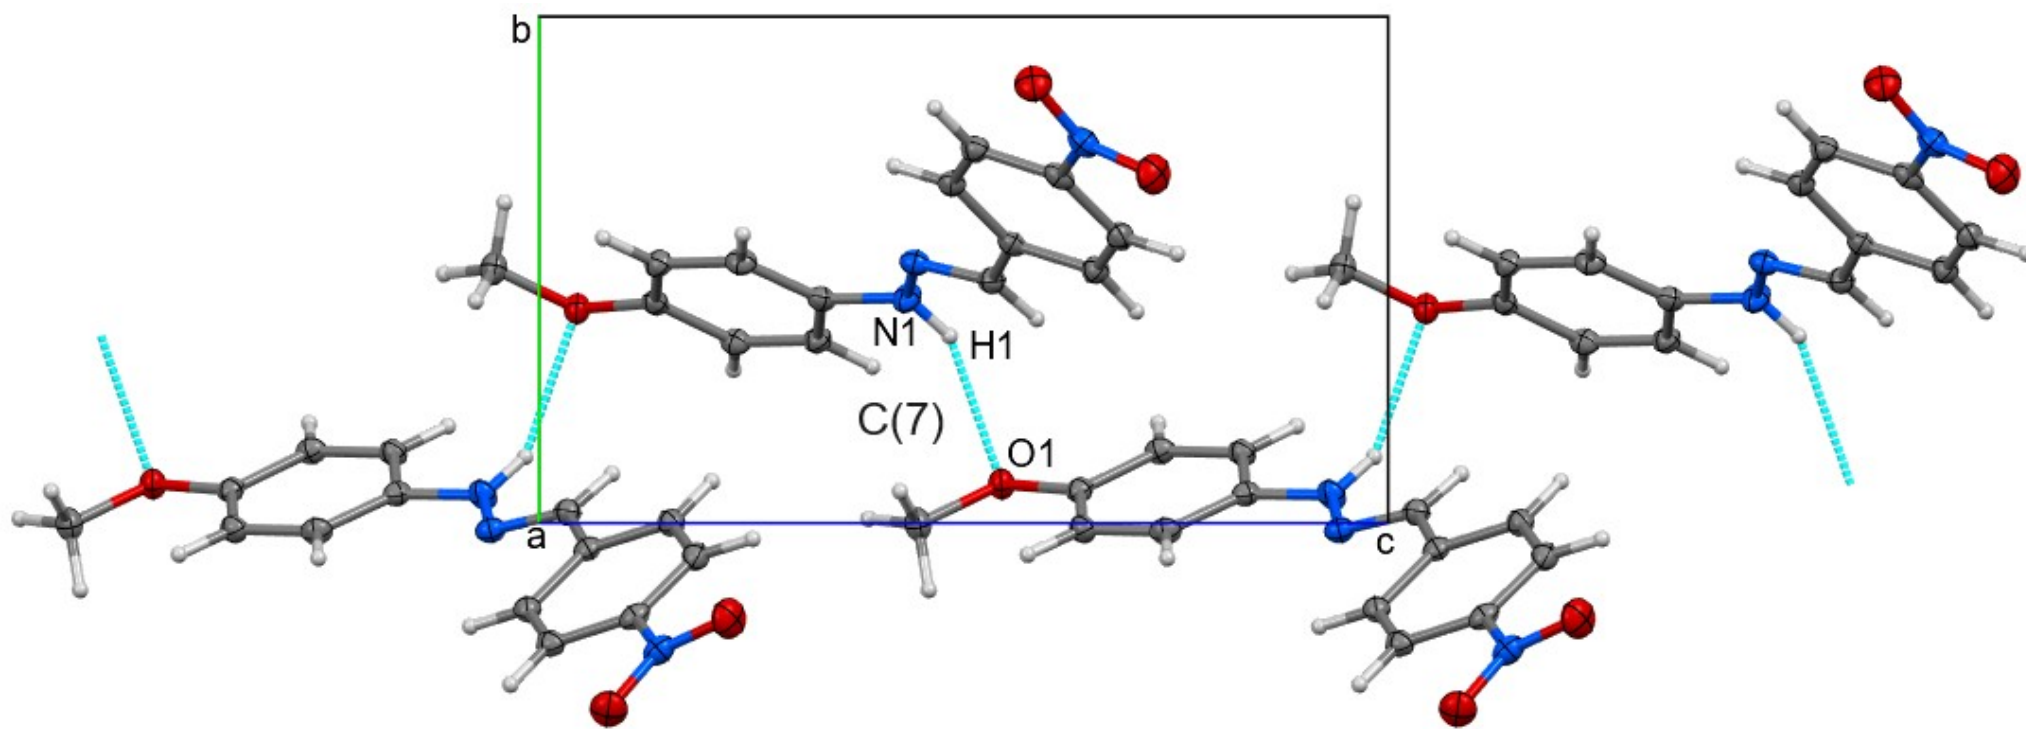

Figure S53. Hydrogen bond chain motif in the structure of **8**.

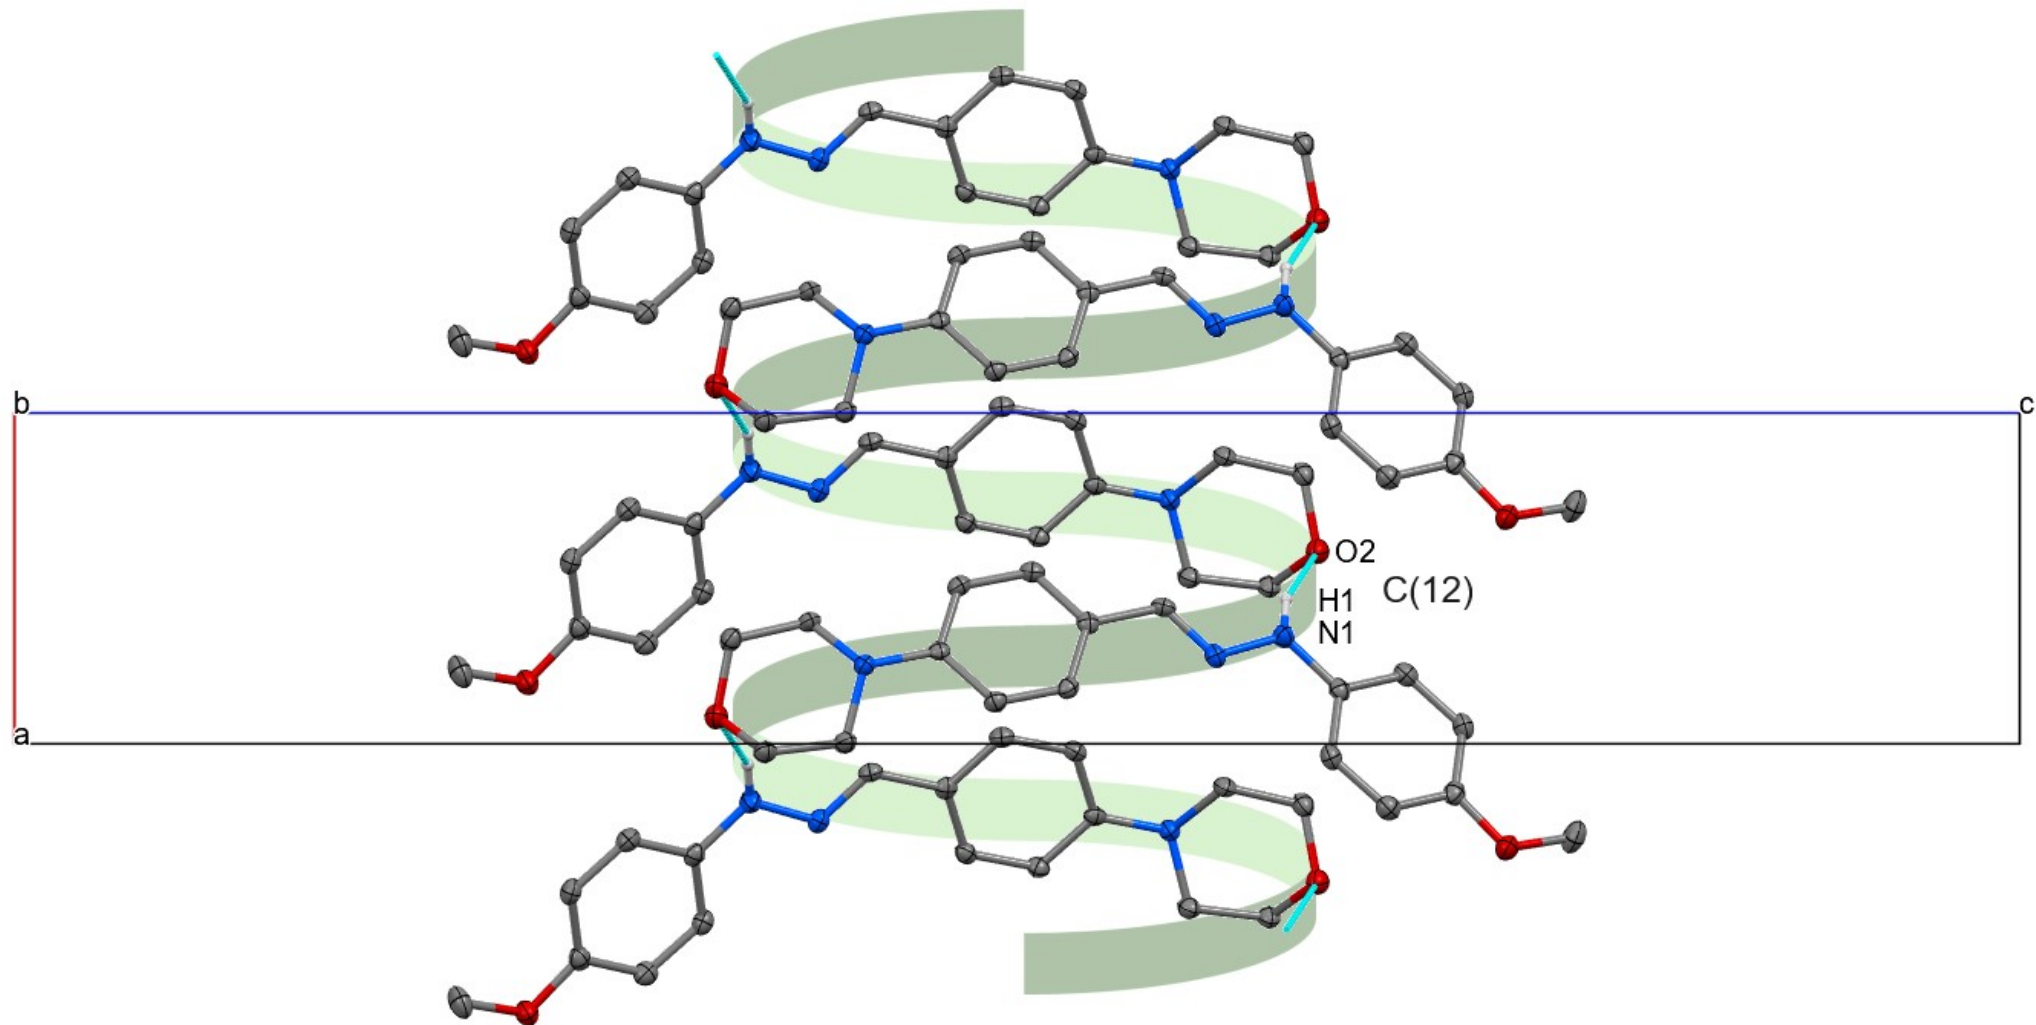

Figure S54. Hydrogen bond right-handed helix motif in the structure of 4.

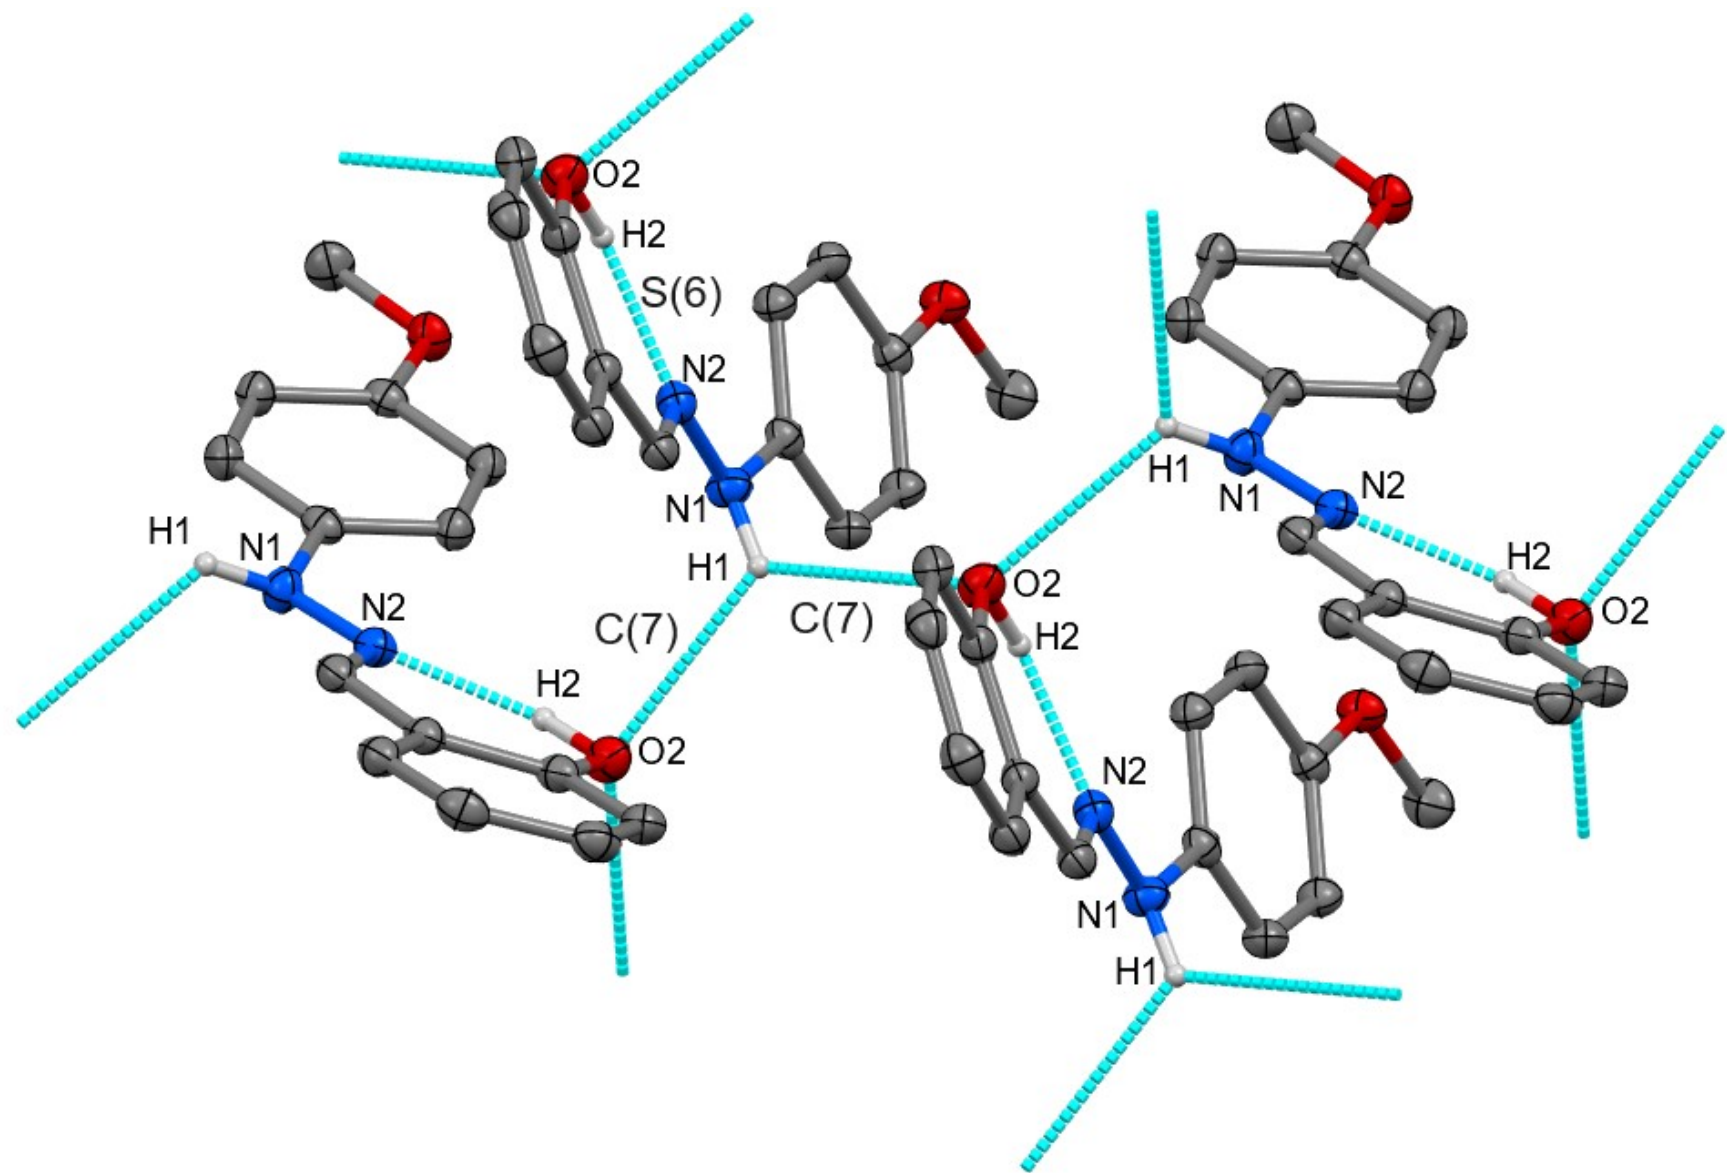

Figure S55. Hydrogen bond system in the structure of 3.

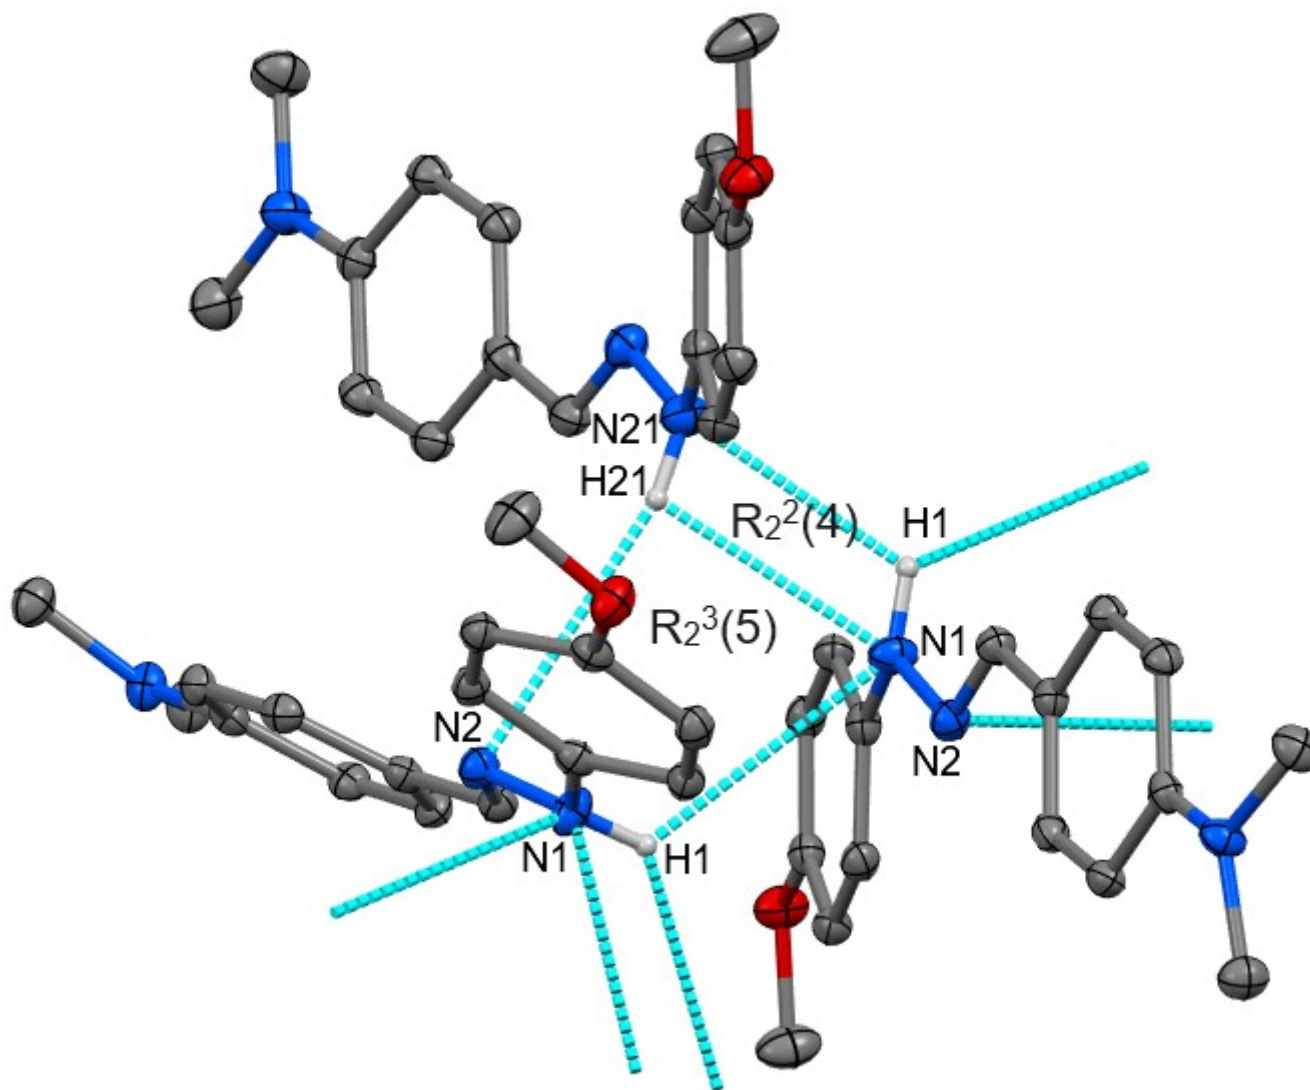

Figure S56. Hydrogen bond system in the structure of 2.

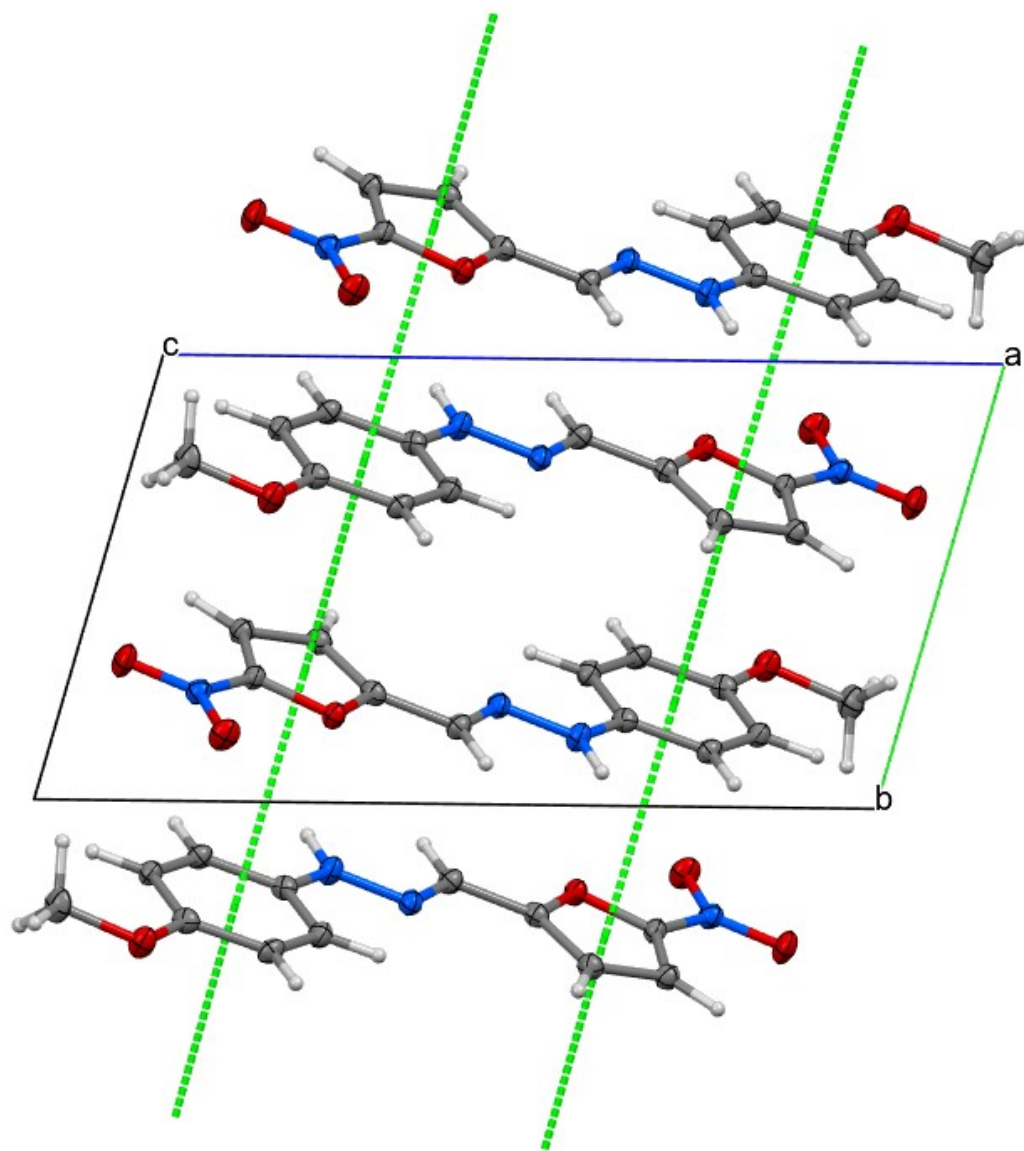

Figure S57.  $\pi\cdots\pi$  stacking interactions in the structure of 7.

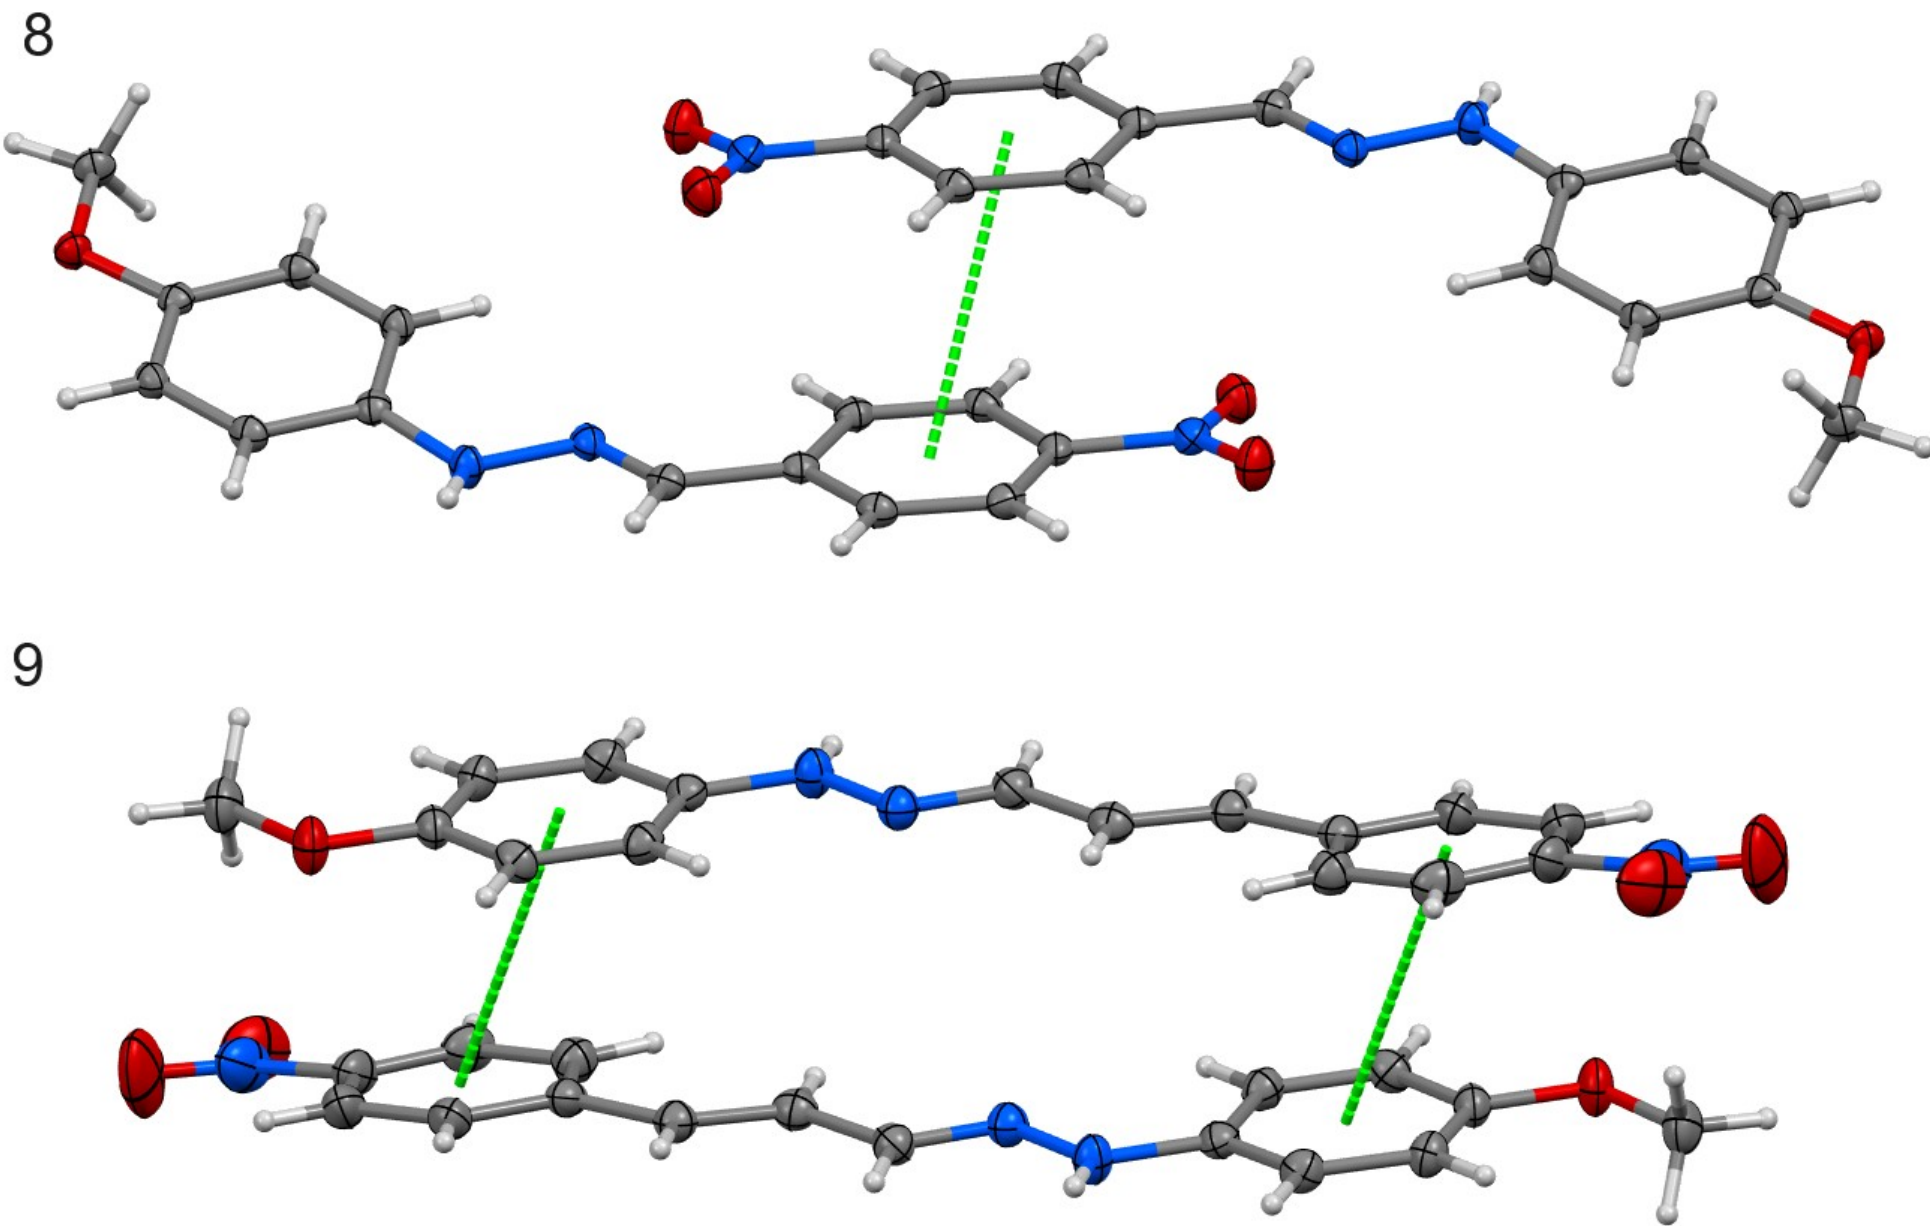

Figure S58.  $\pi\cdots\pi$  stacking dimers in the structure of **8** and **9**.

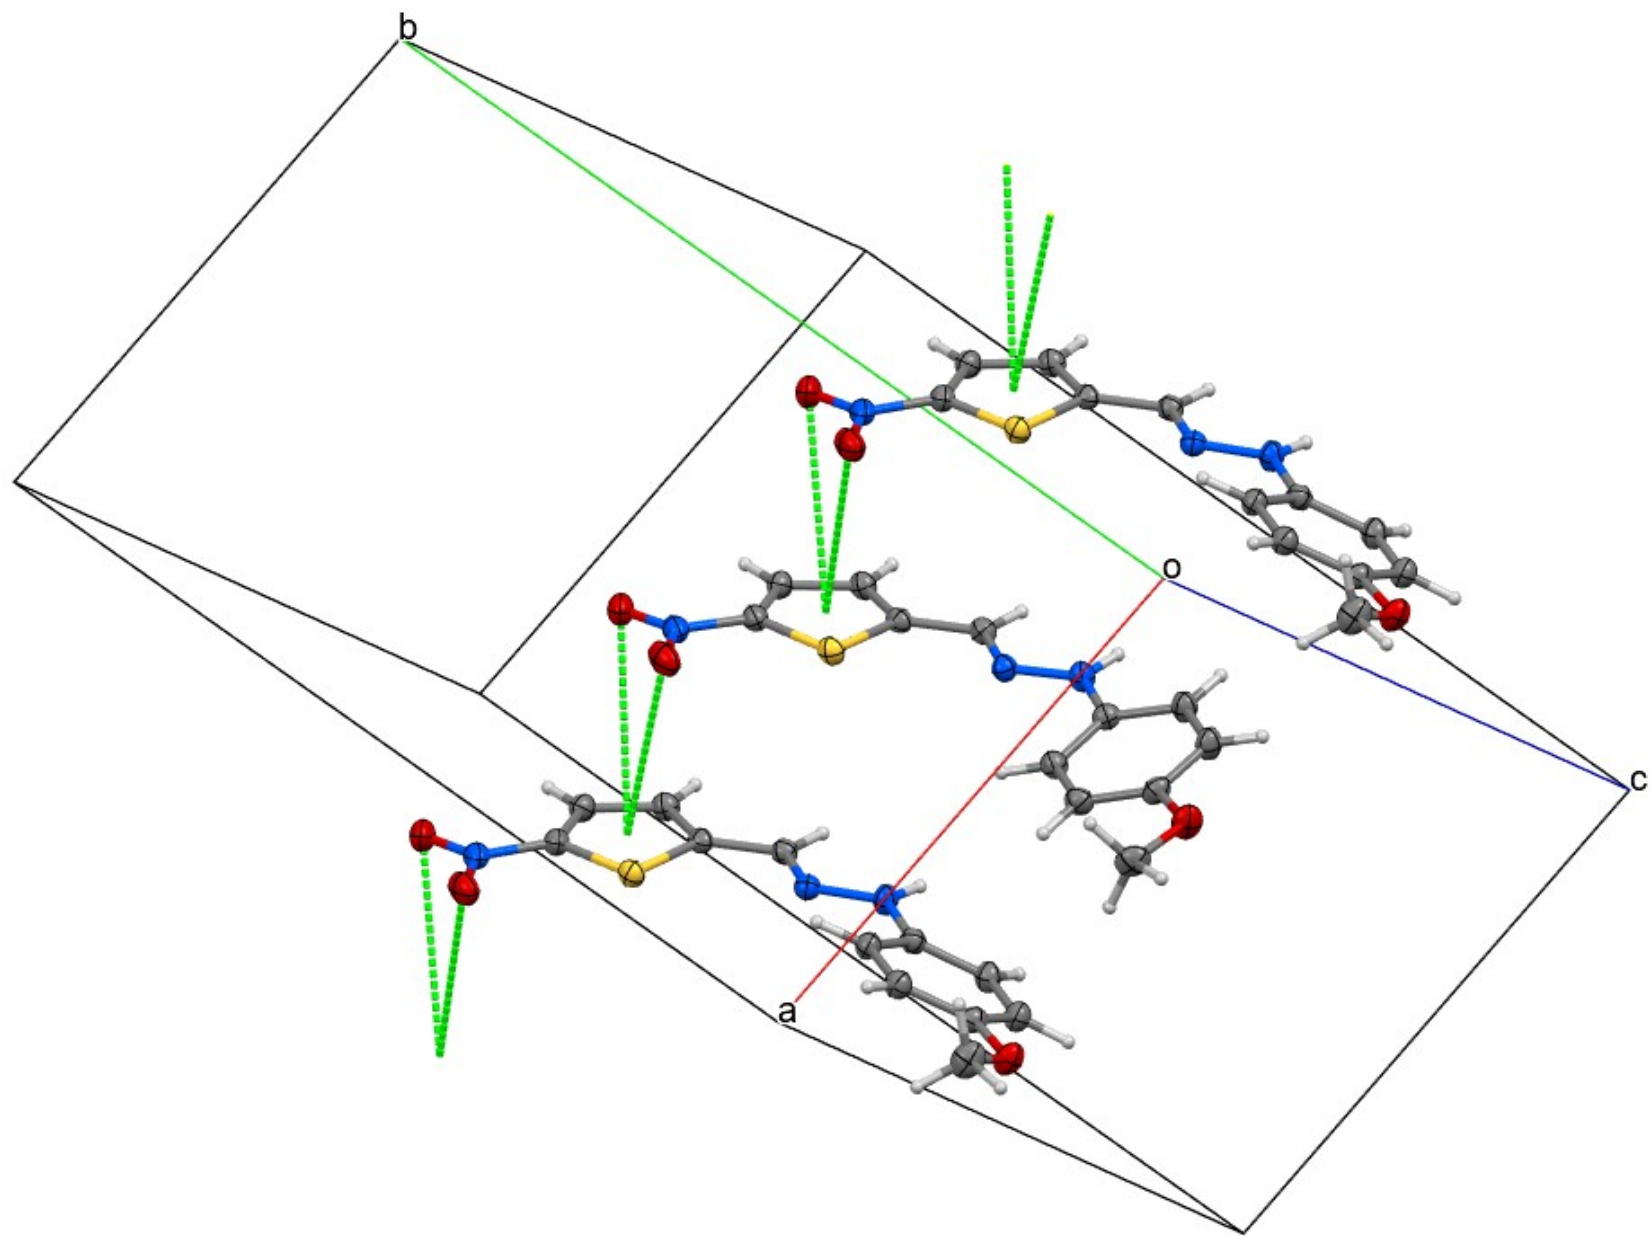

Figure S59. Anion... $\pi$  interactions in the structure of **10**.

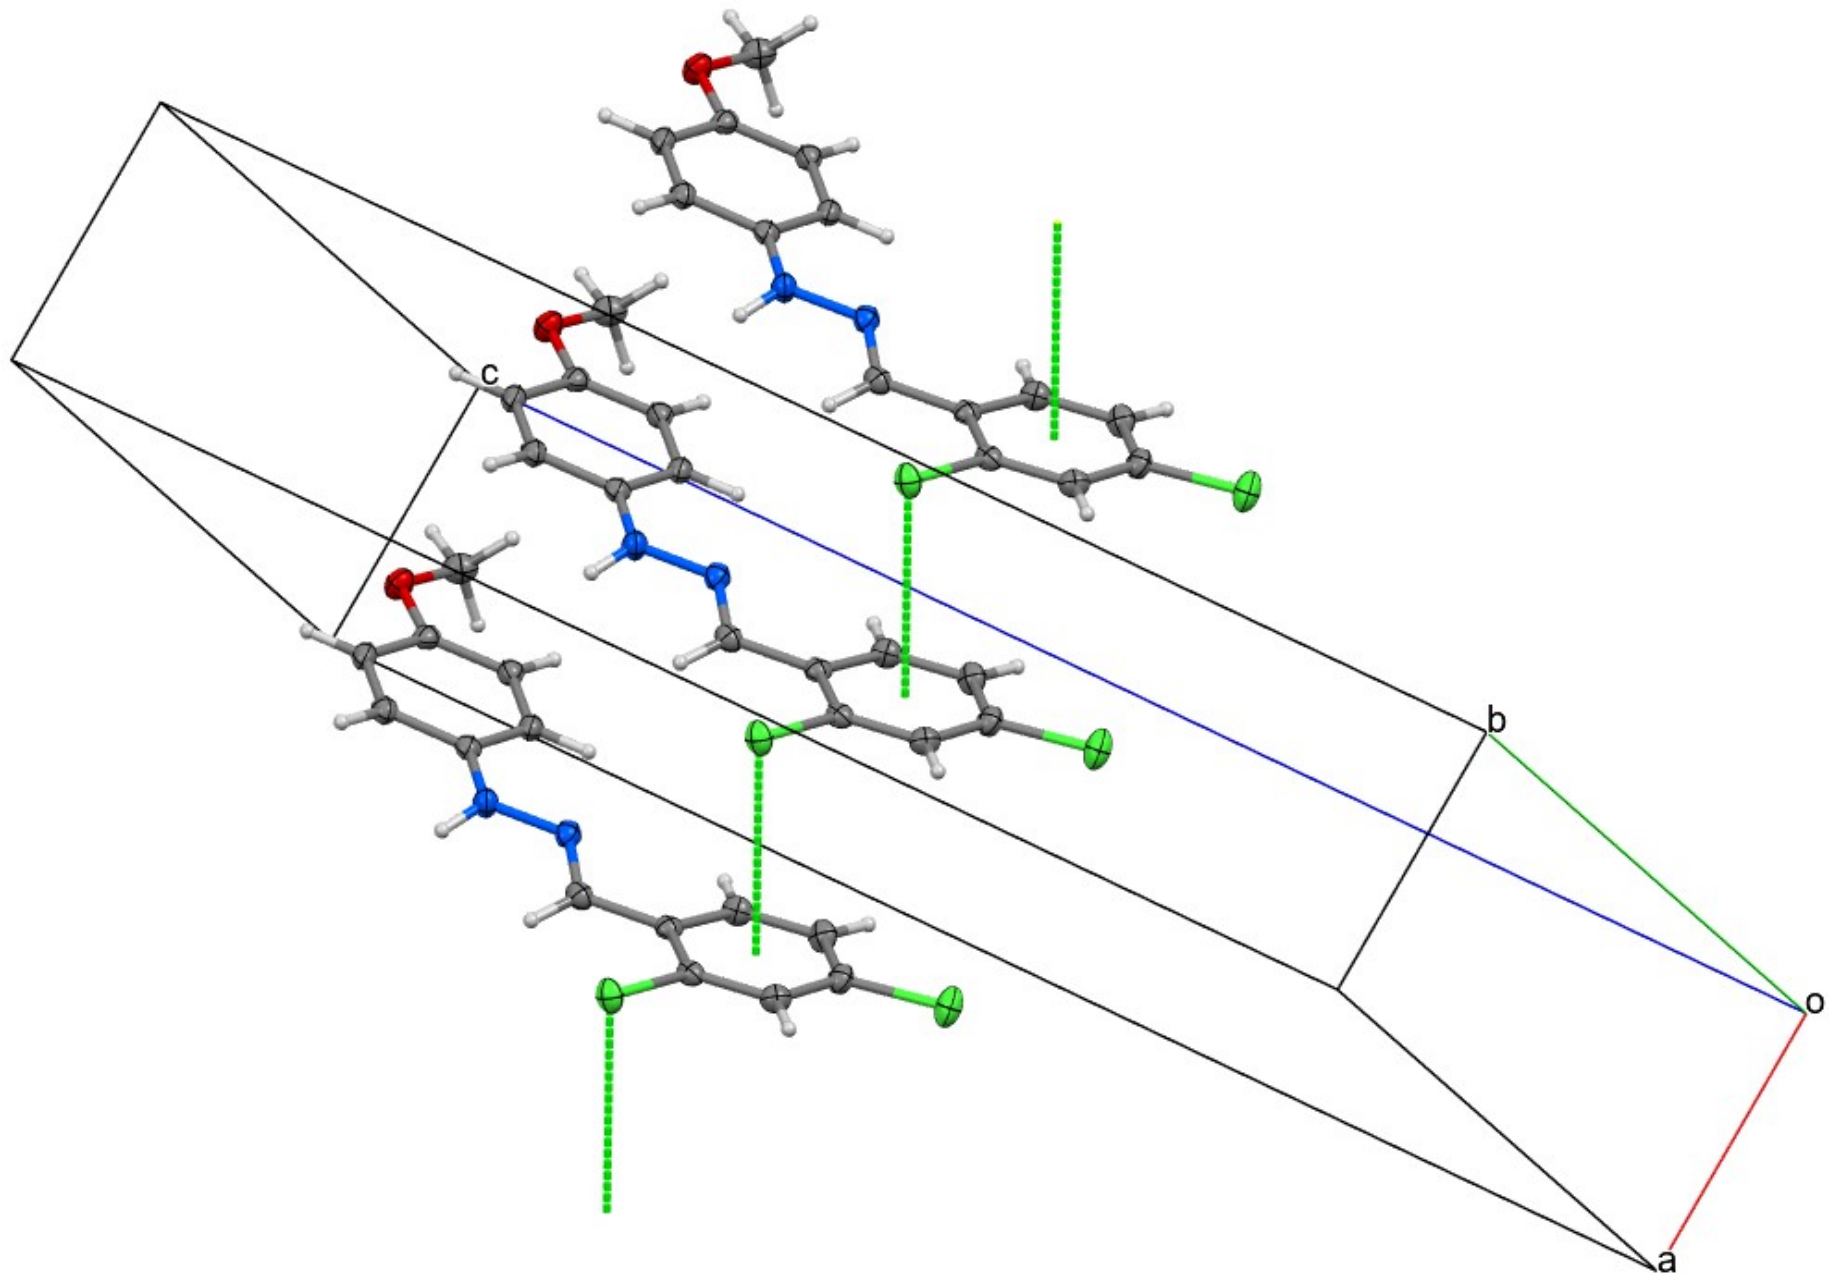

Figure S60. Anion... $\pi$  interactions in the structure of **5**.



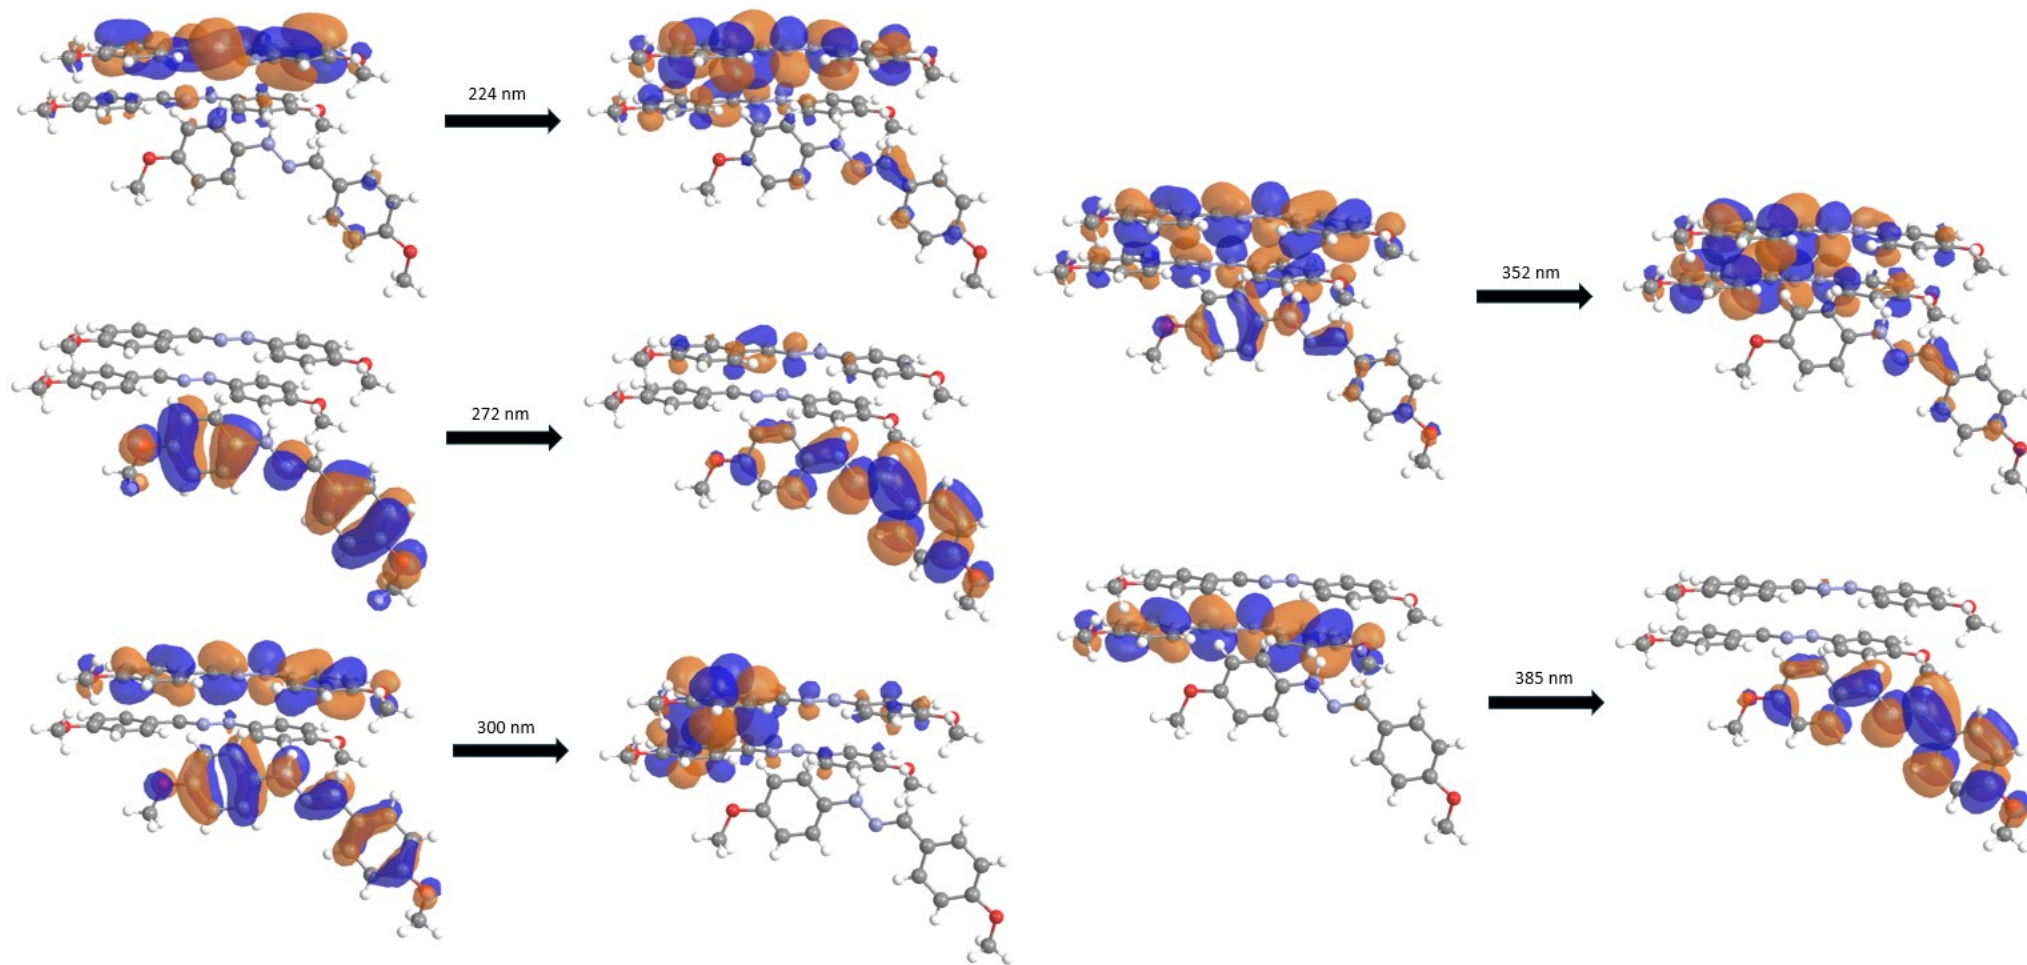

Figure S61. Calculated molecular orbital transition in the studied compound (1).

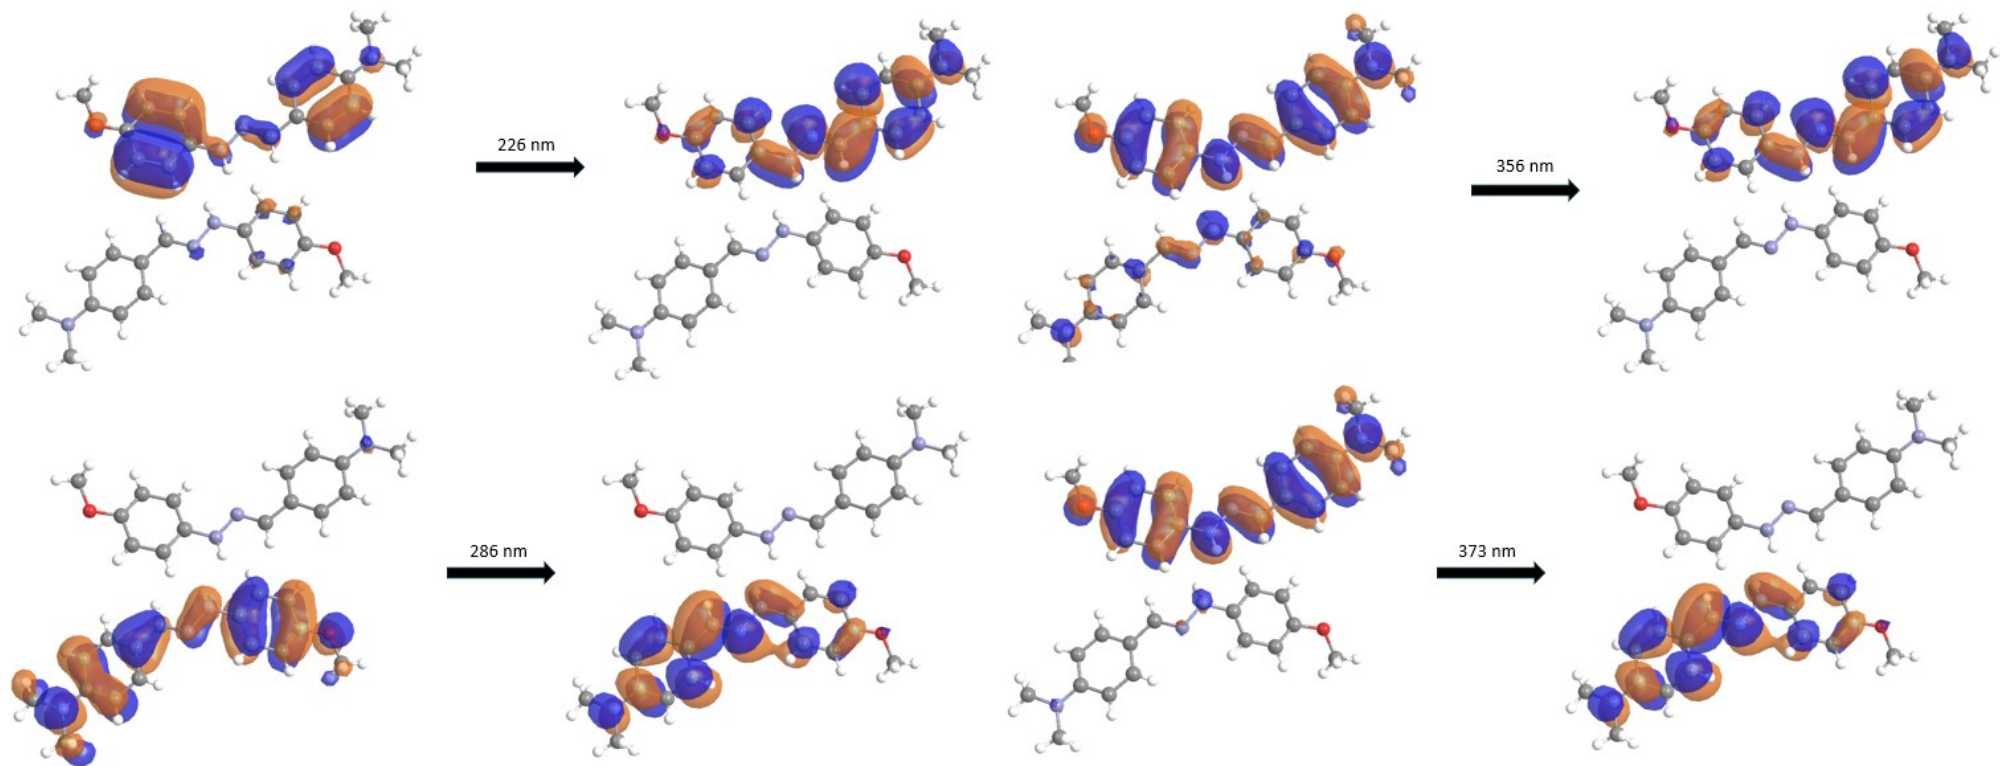

Figure S62. Calculated molecular orbital transition in the studied compound (2).

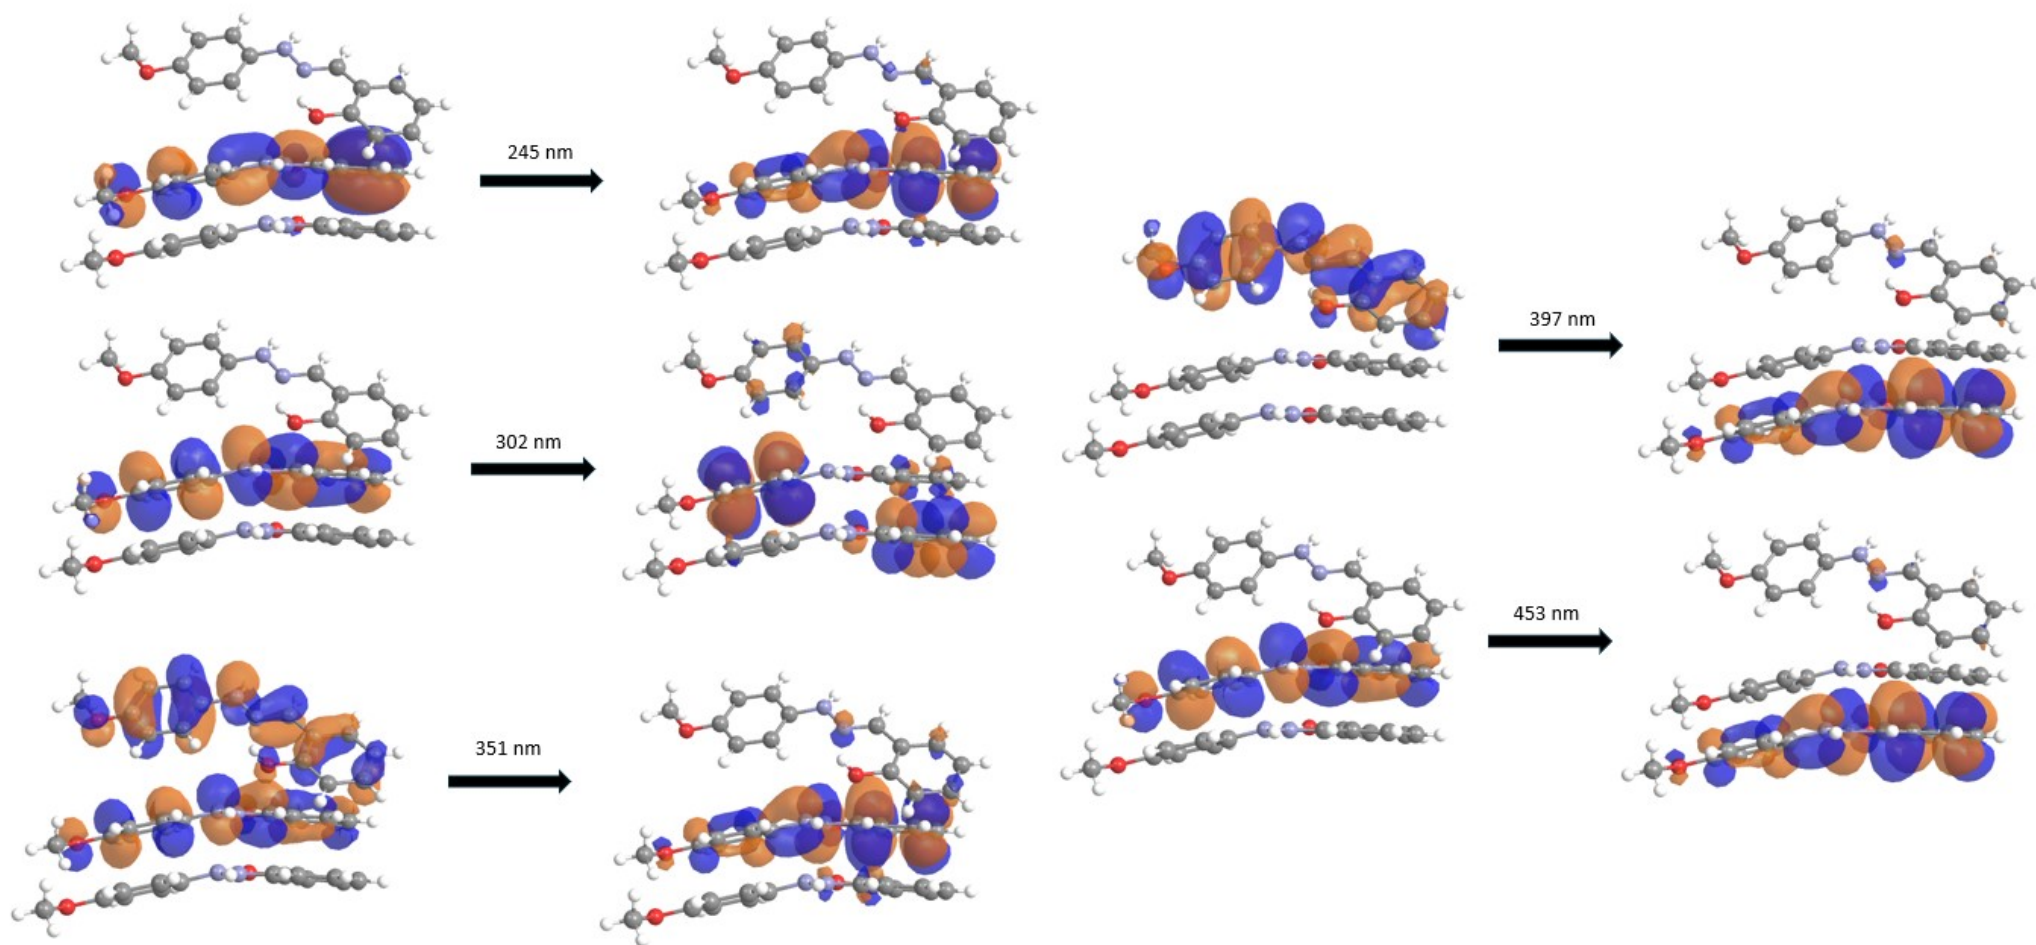

Figure S63. Calculated molecular orbital transition in the studied compound (**3**).

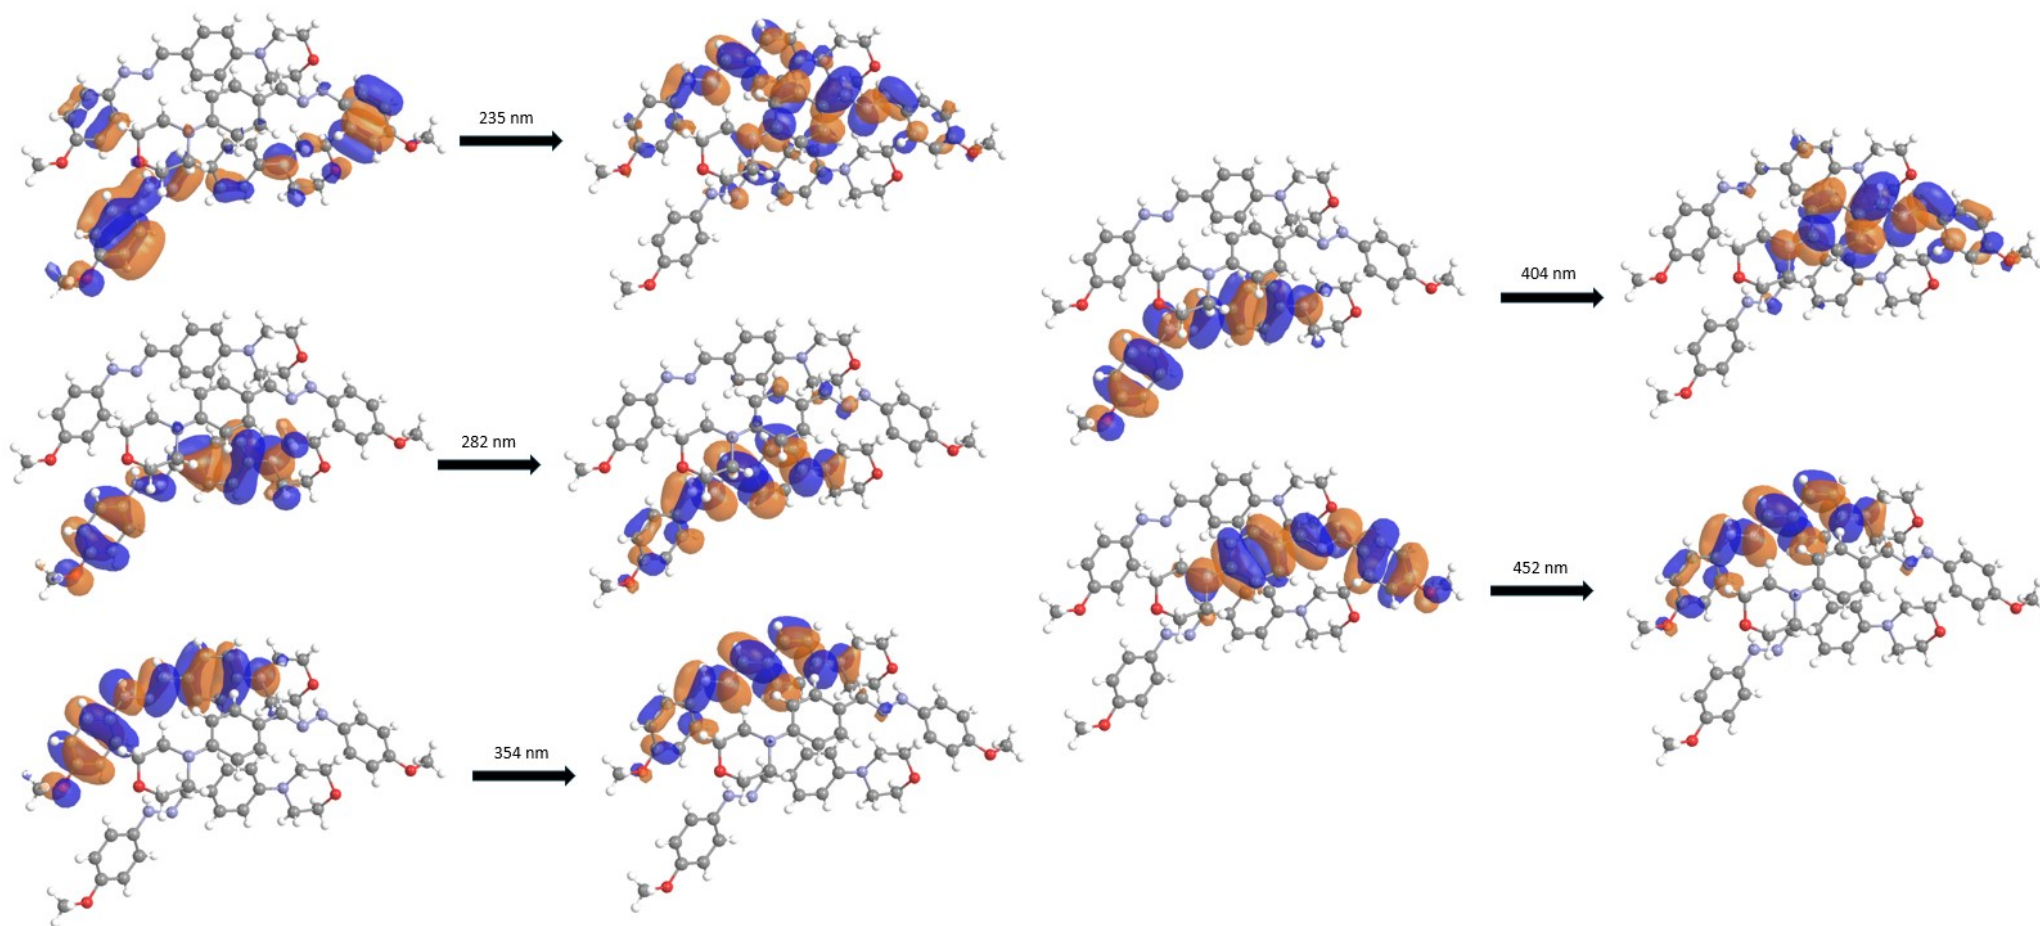

Figure S64. Calculated molecular orbital transition in the studied compound (4).

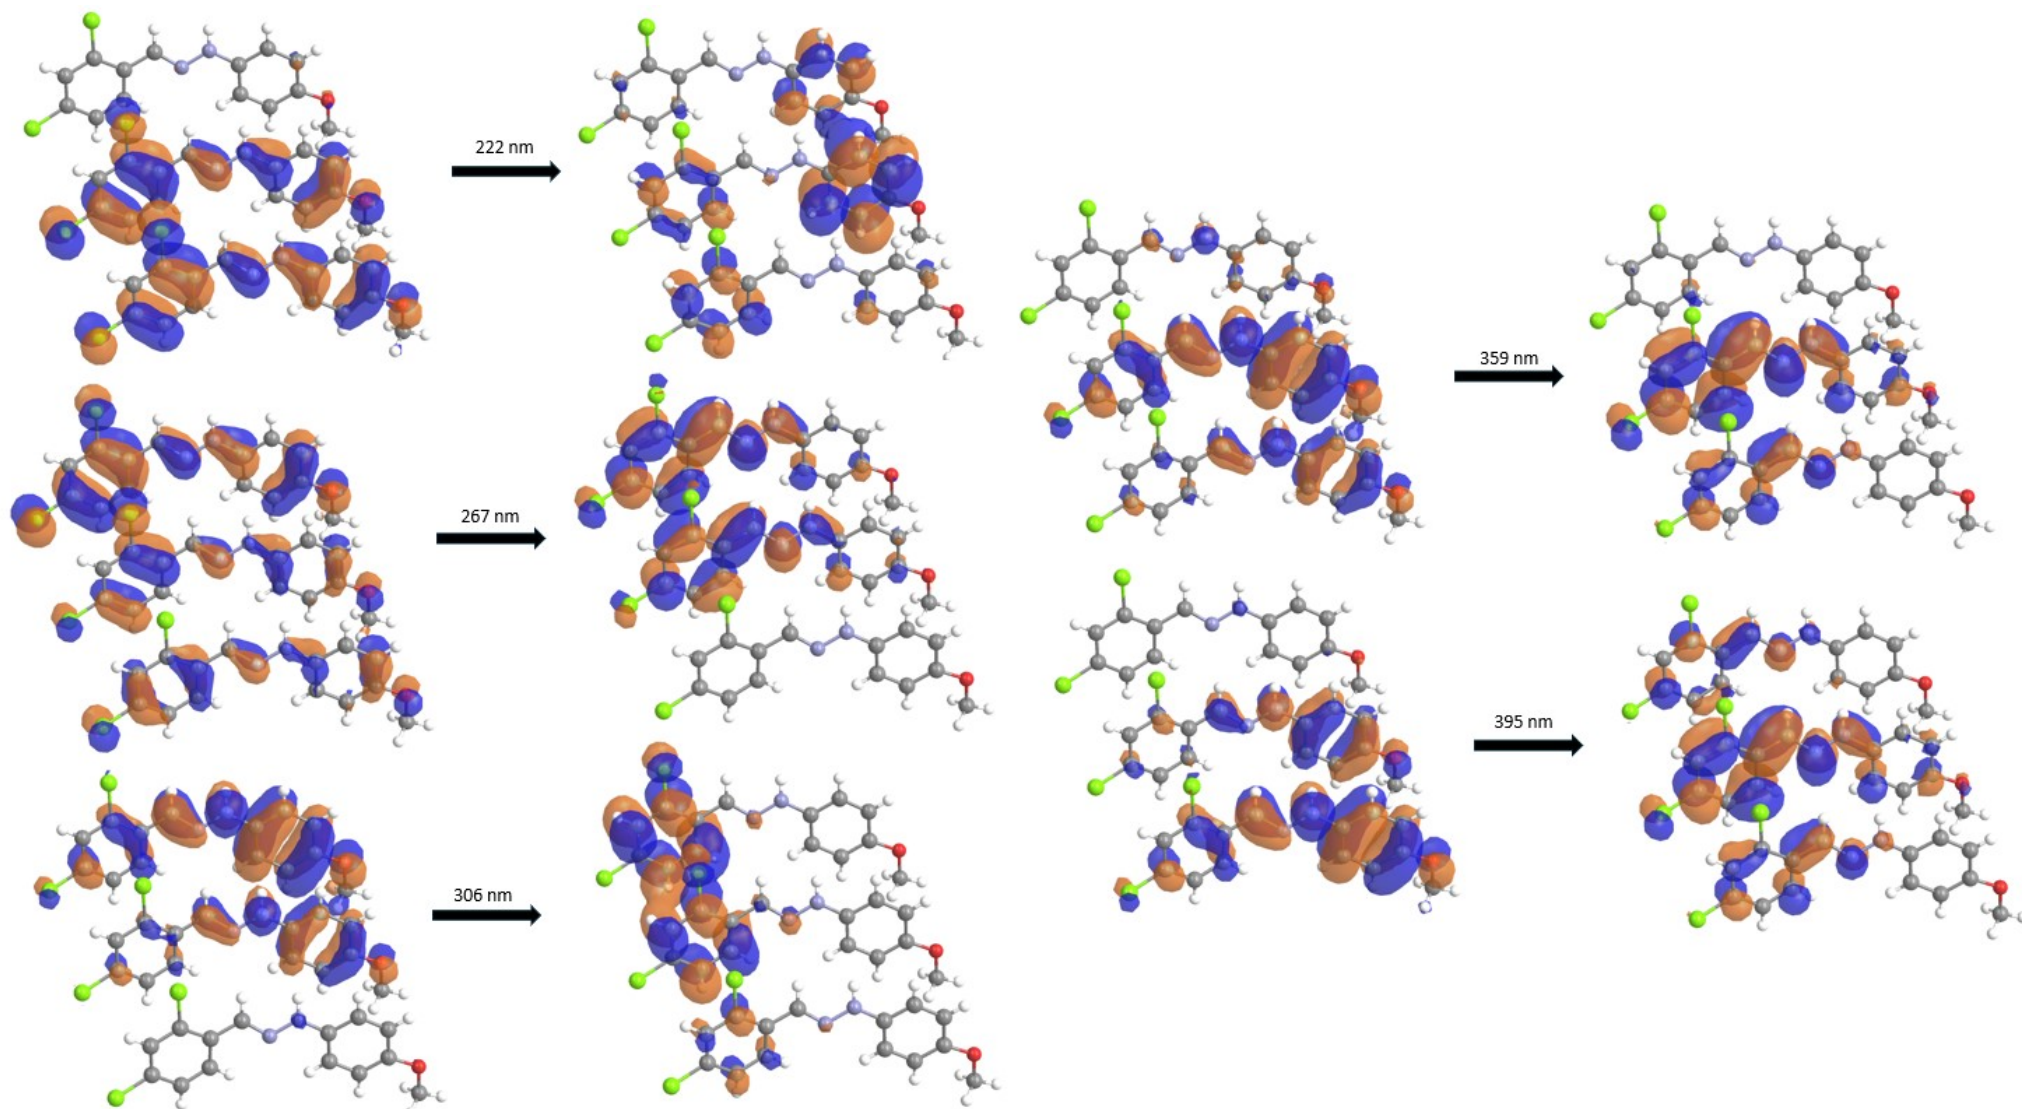

Figure S65. Calculated molecular orbital transition in the studied compound (5).

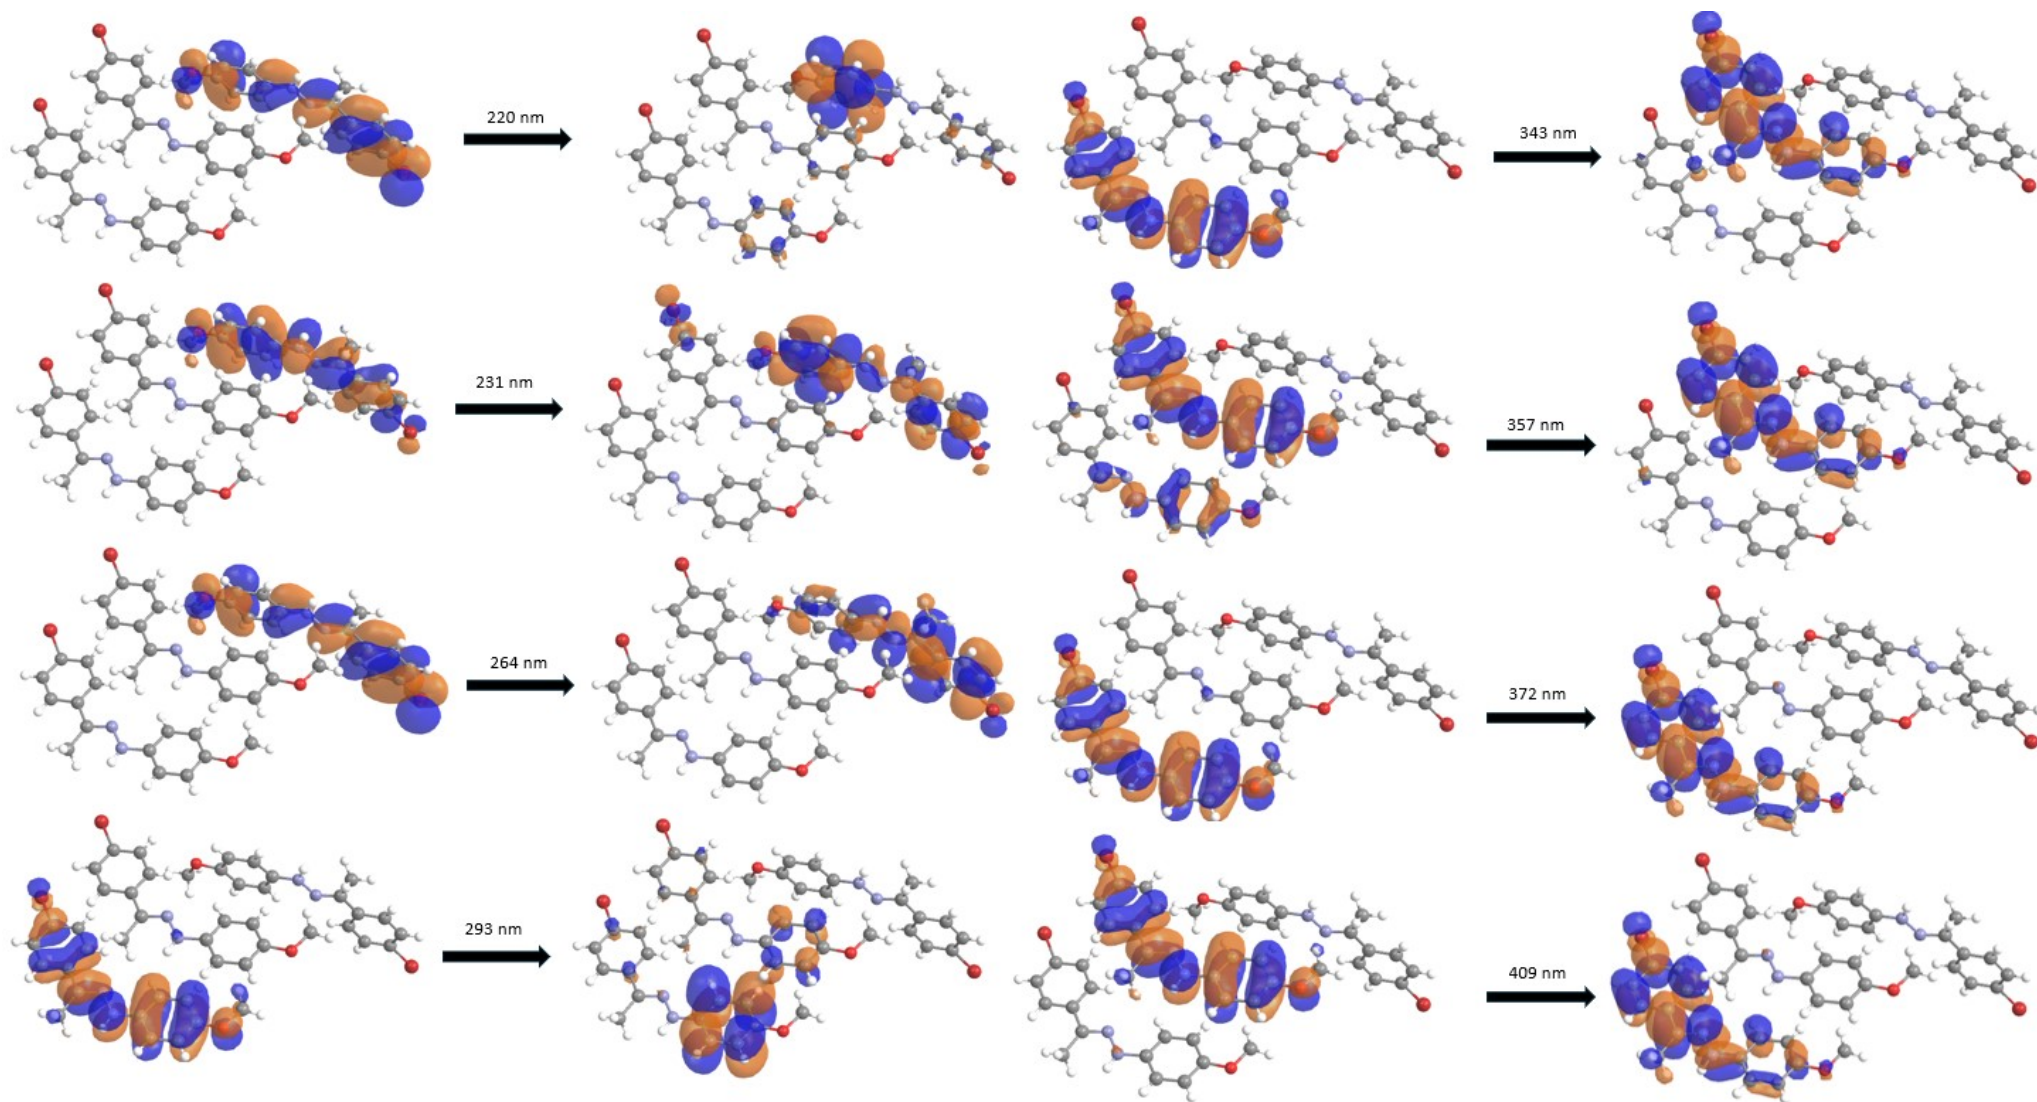

Figure S66. Calculated molecular orbital transition in the studied compound (**6**).

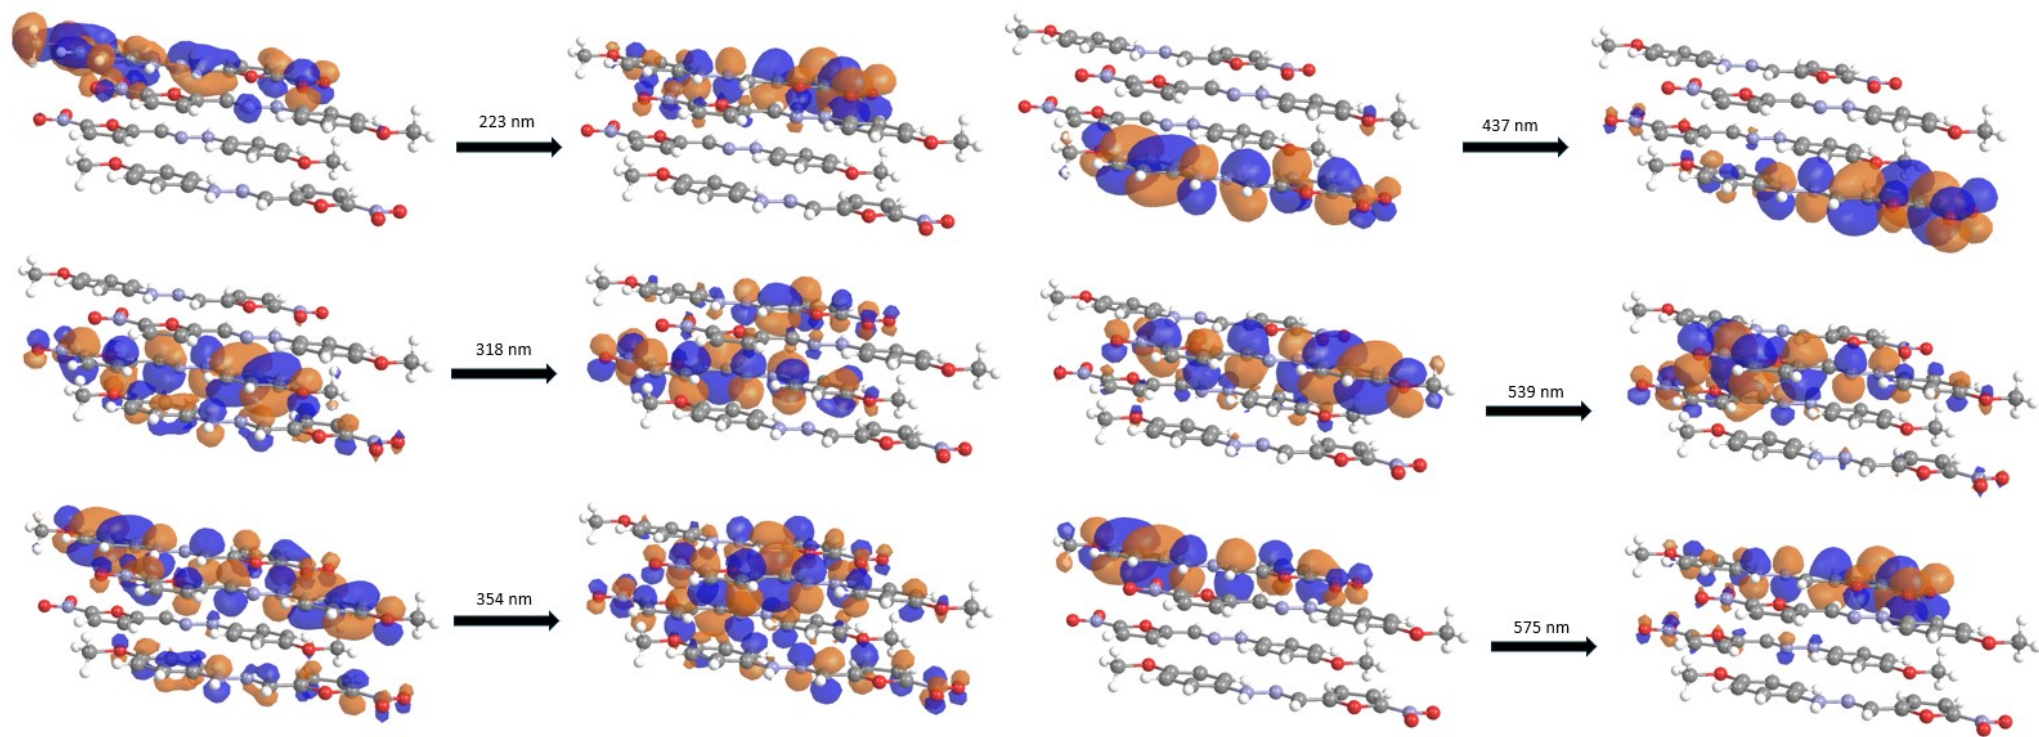

Figure S67. Calculated molecular orbital transition in the studied compound (7).

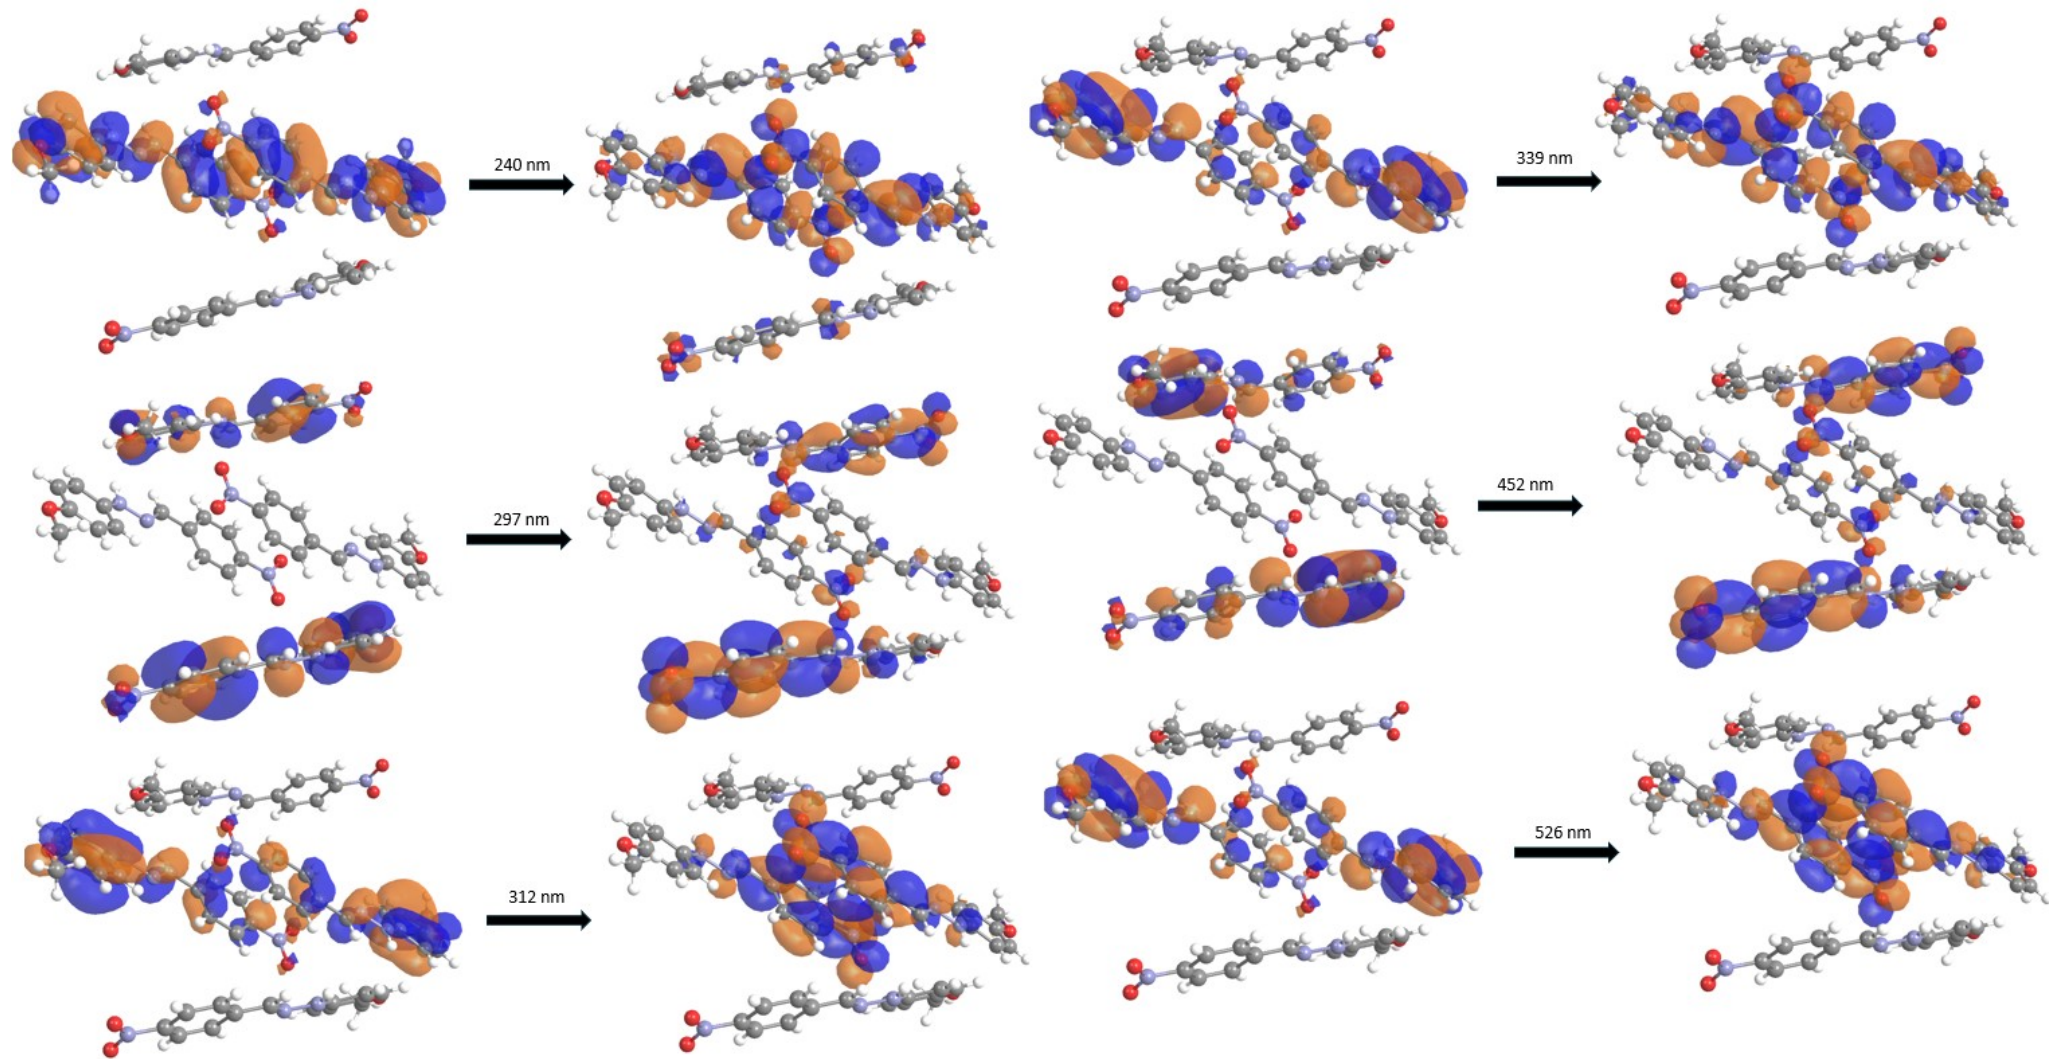

Figure S68. Calculated molecular orbital transition in the studied compound (8).



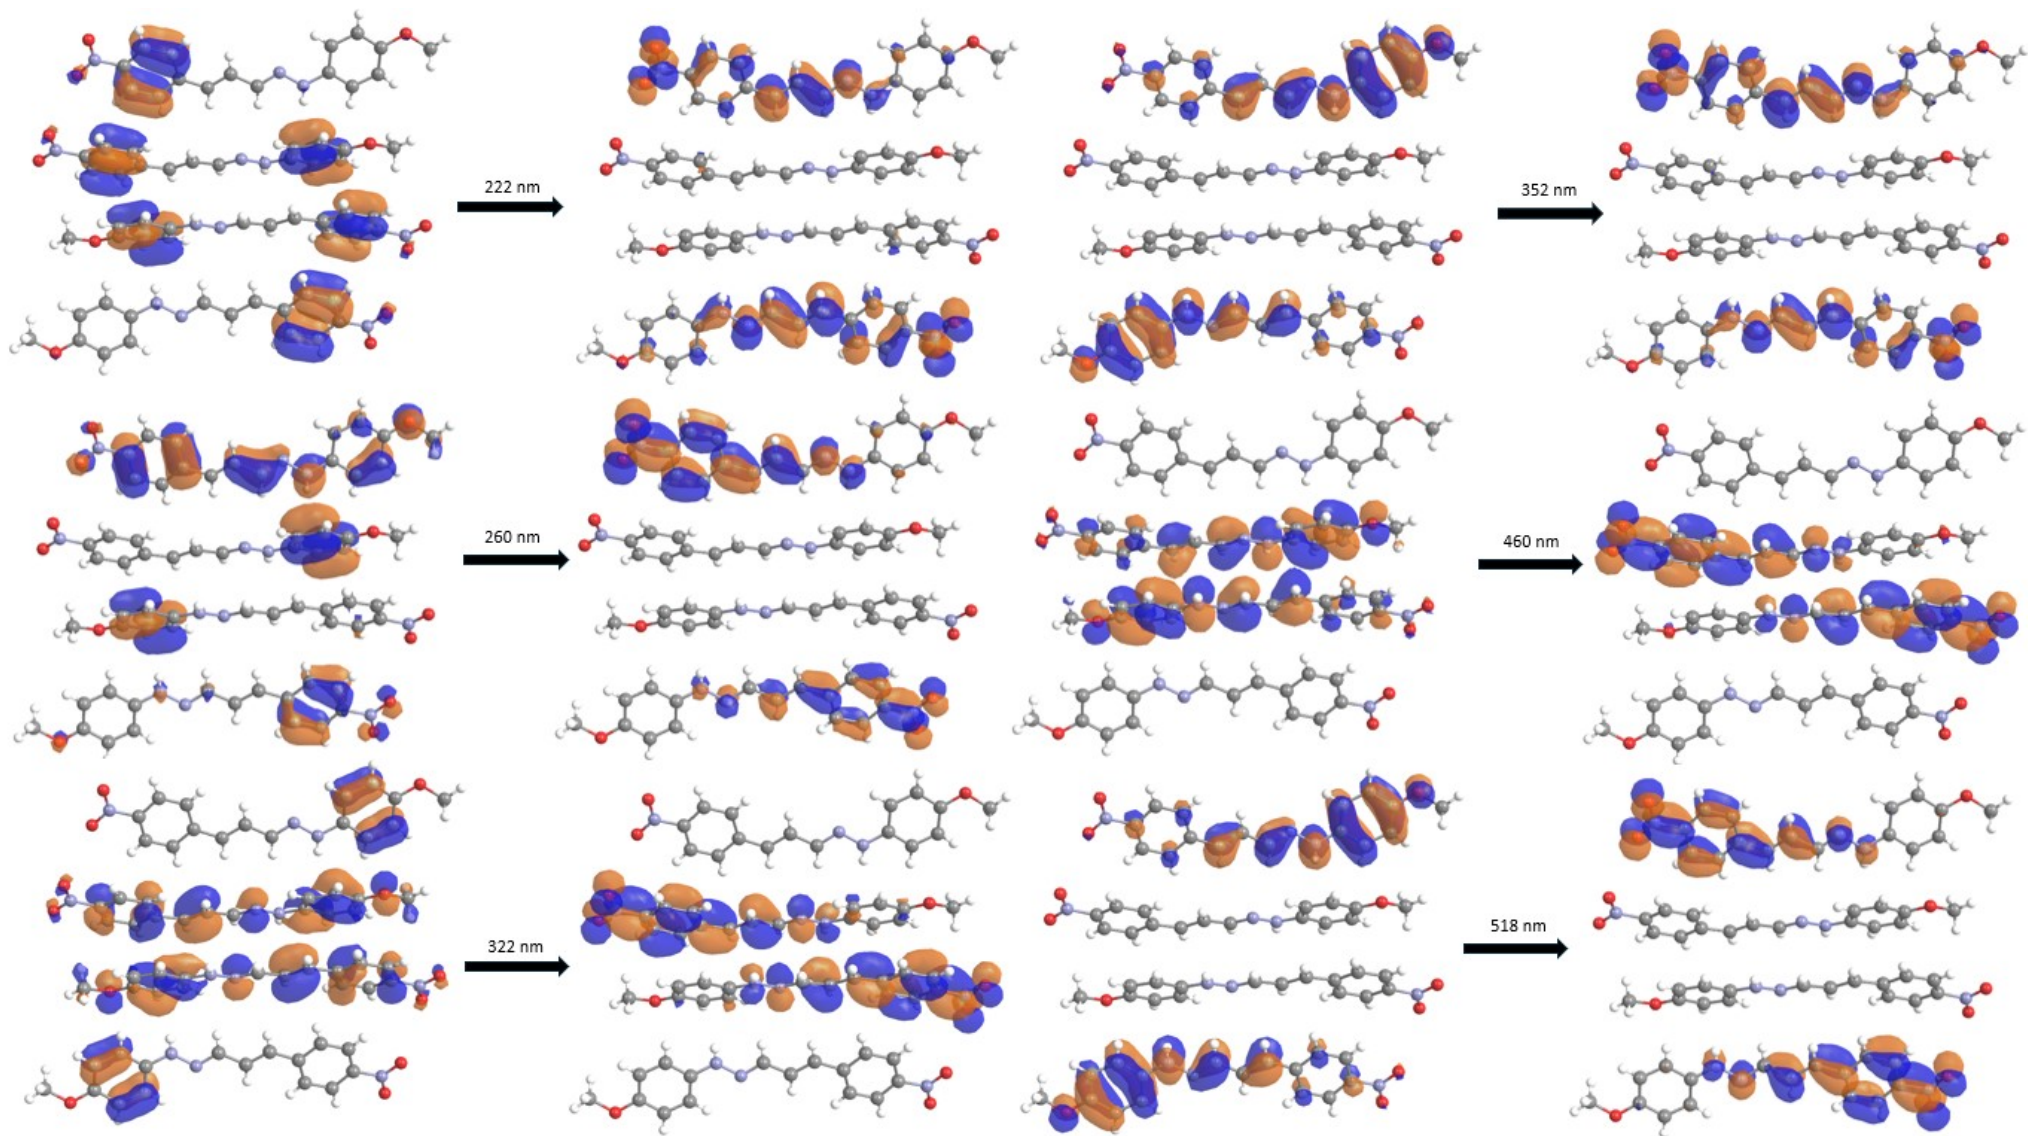

Figure S69. Calculated molecular orbital transition in the studied compound (9).

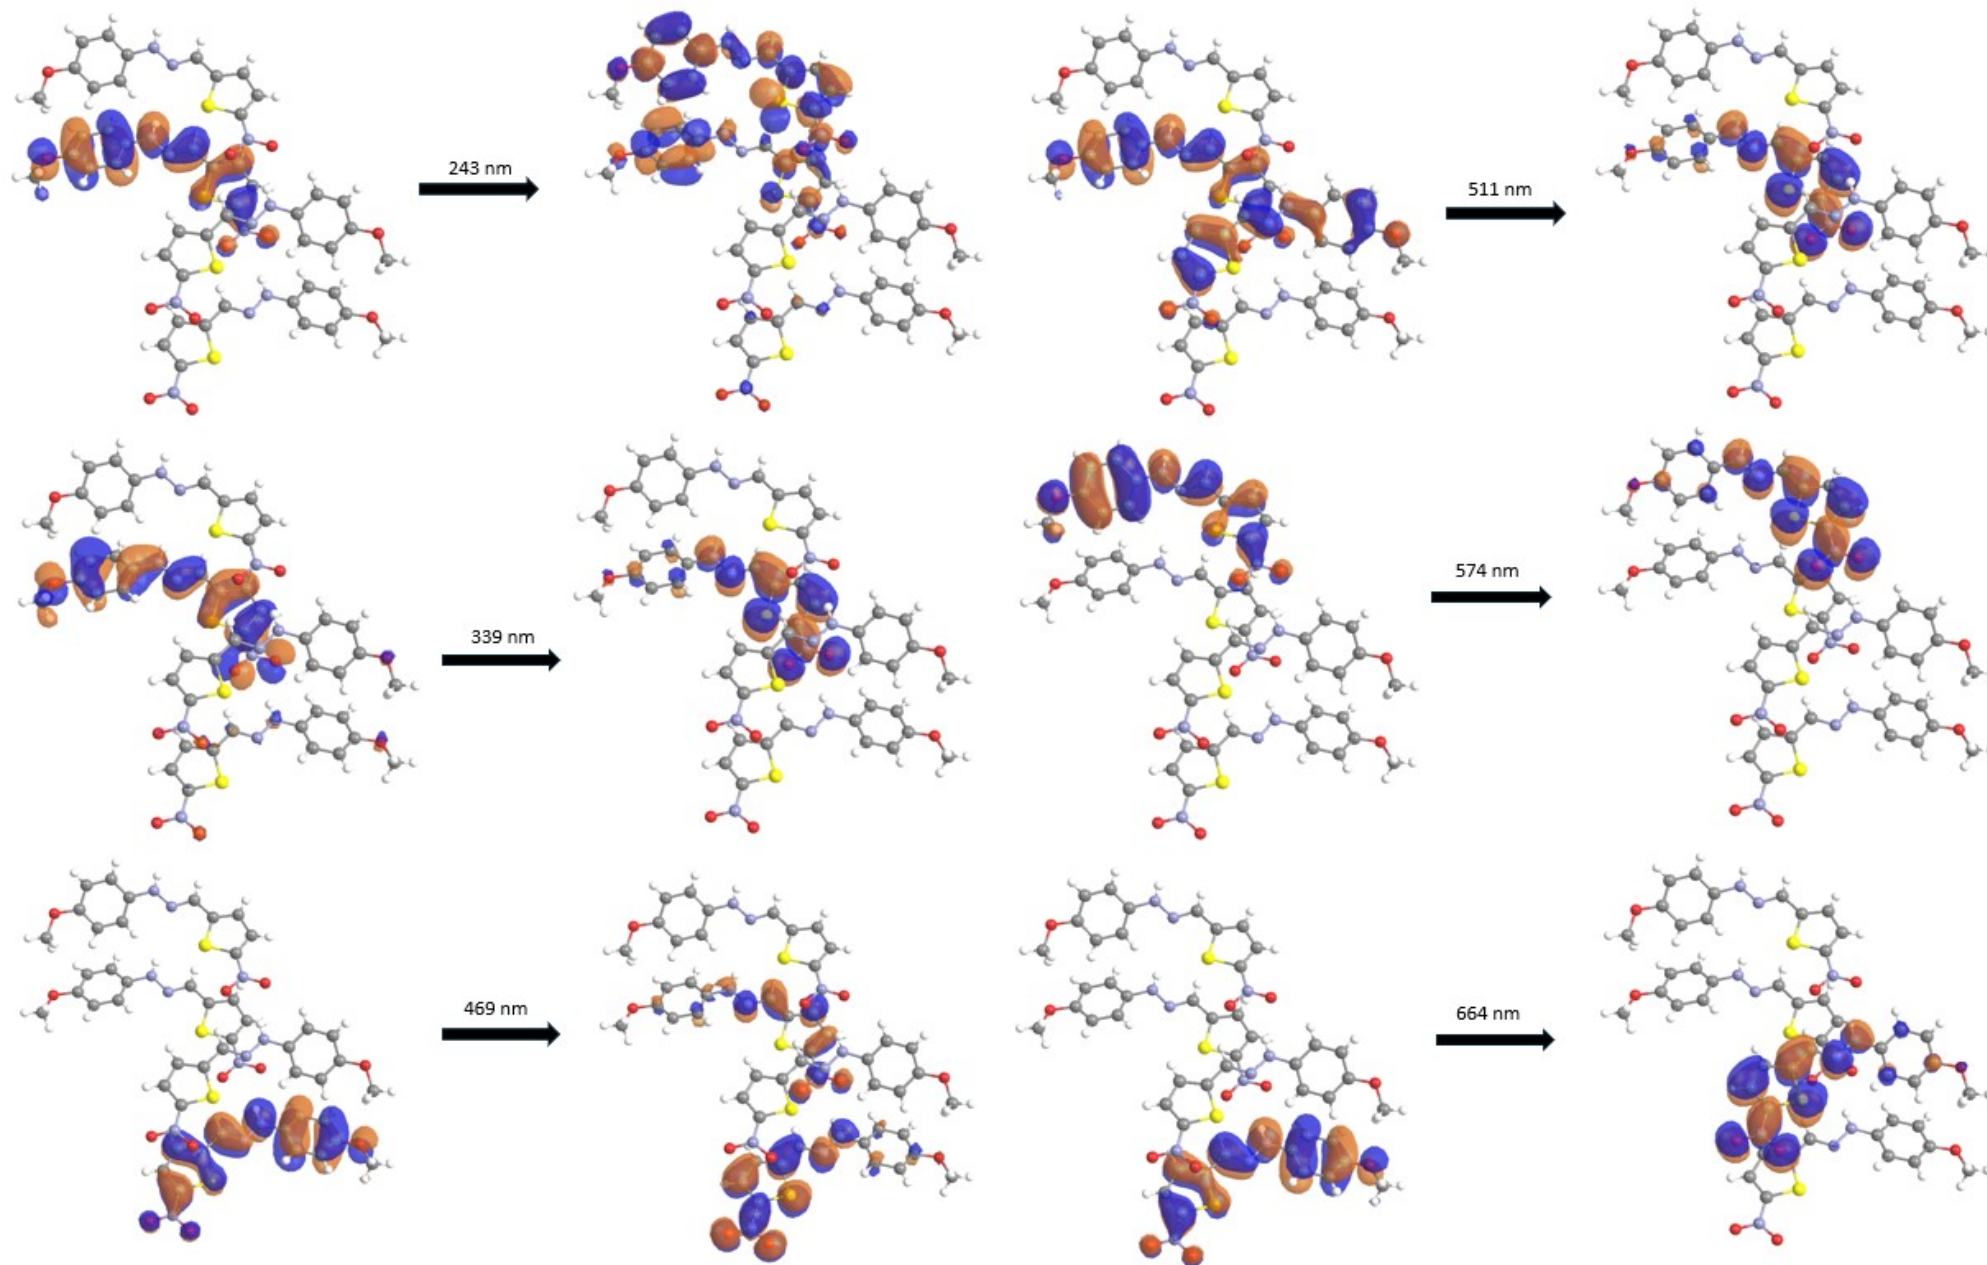

Figure S70. Calculated molecular orbital transition in the studied compound (10).

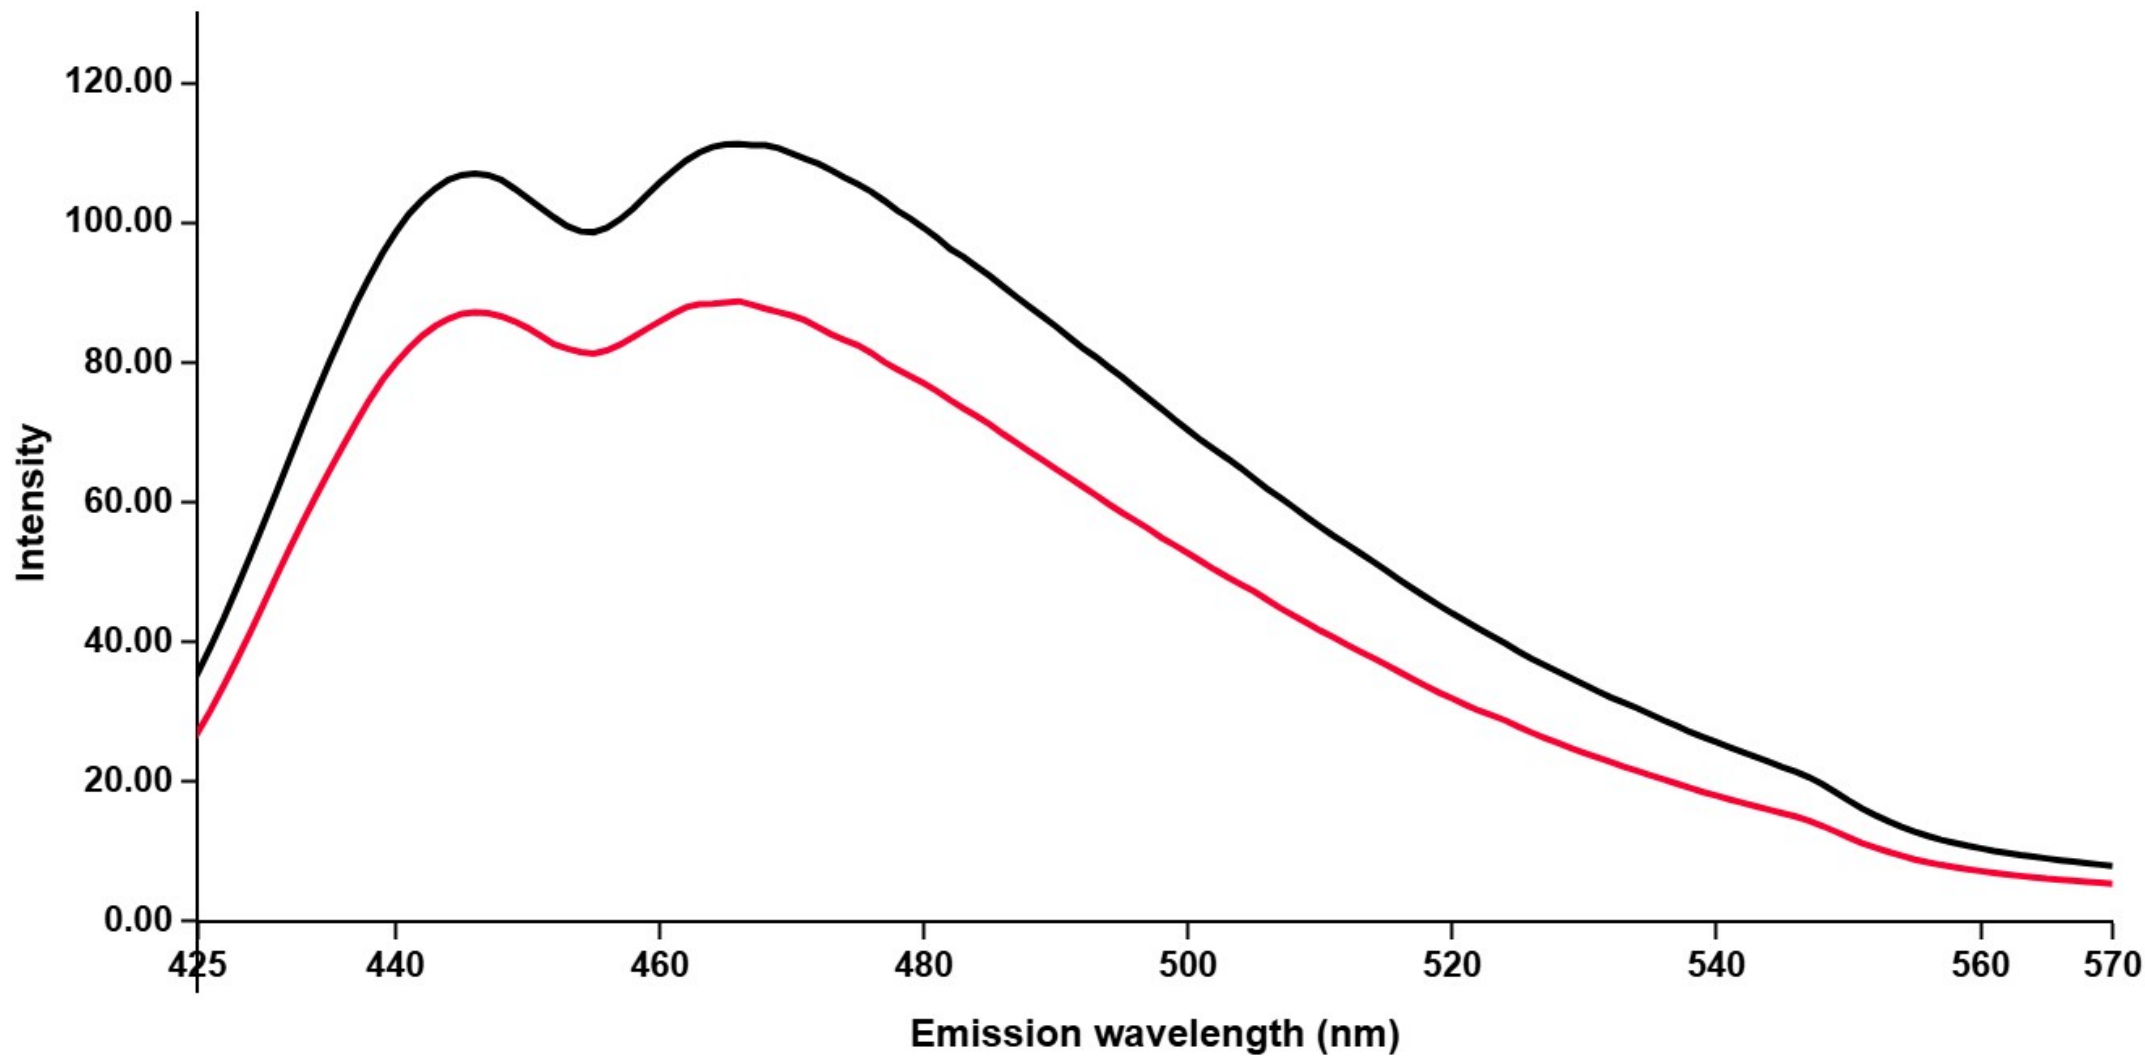

Figure S71. 2D fluorescence emission spectra for compound 1 at two excitation wavelengths: black line at  $\lambda_{ex} = 415$  nm and red line at  $\lambda_{ex} = 364$  nm, showing intensity as a function of emission wavelength.

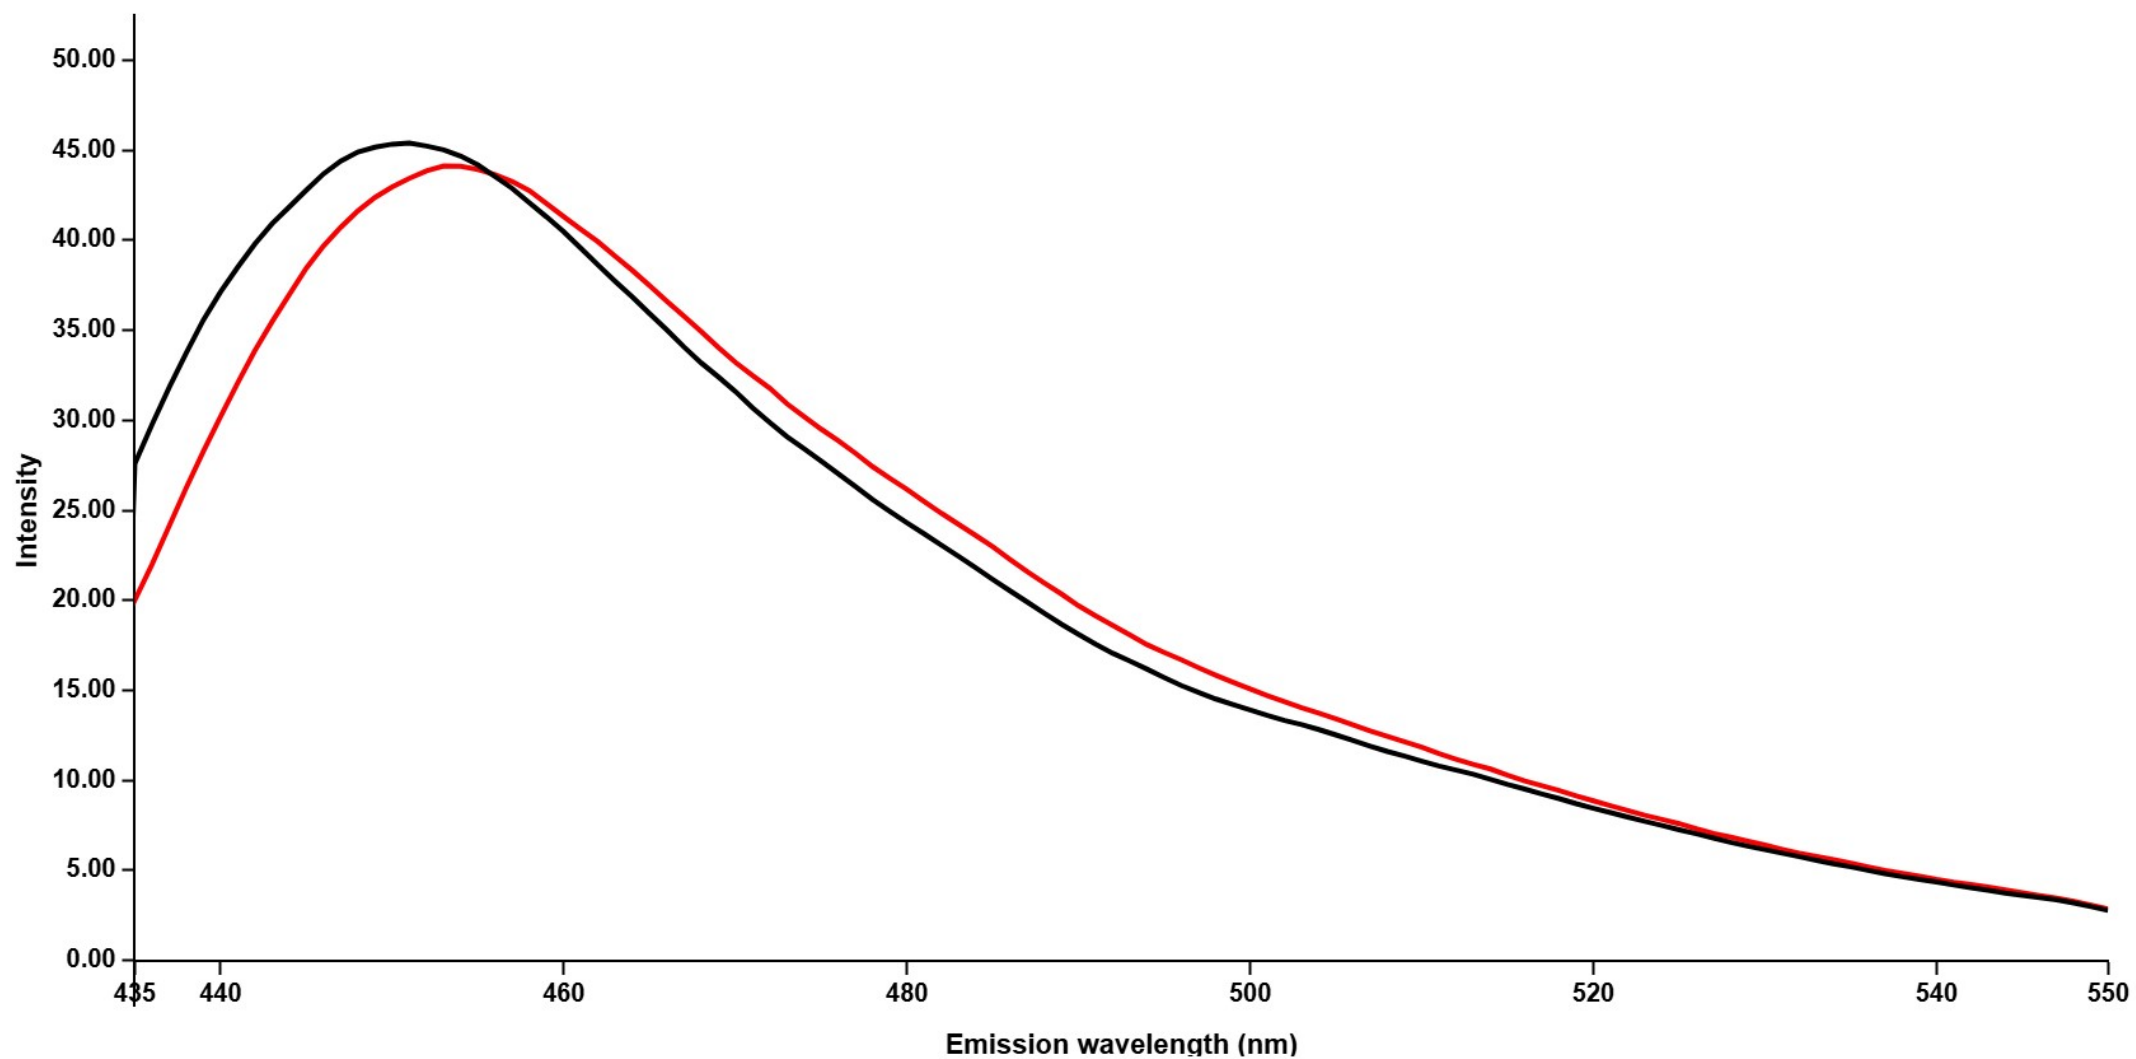

Figure S72. 2D fluorescence emission spectra for compound 2 at two excitation wavelengths: black line at  $\lambda_{ex}$  = 428 nm and red line at  $\lambda_{ex}$  = 359 nm, showing intensity as a function of emission wavelength.

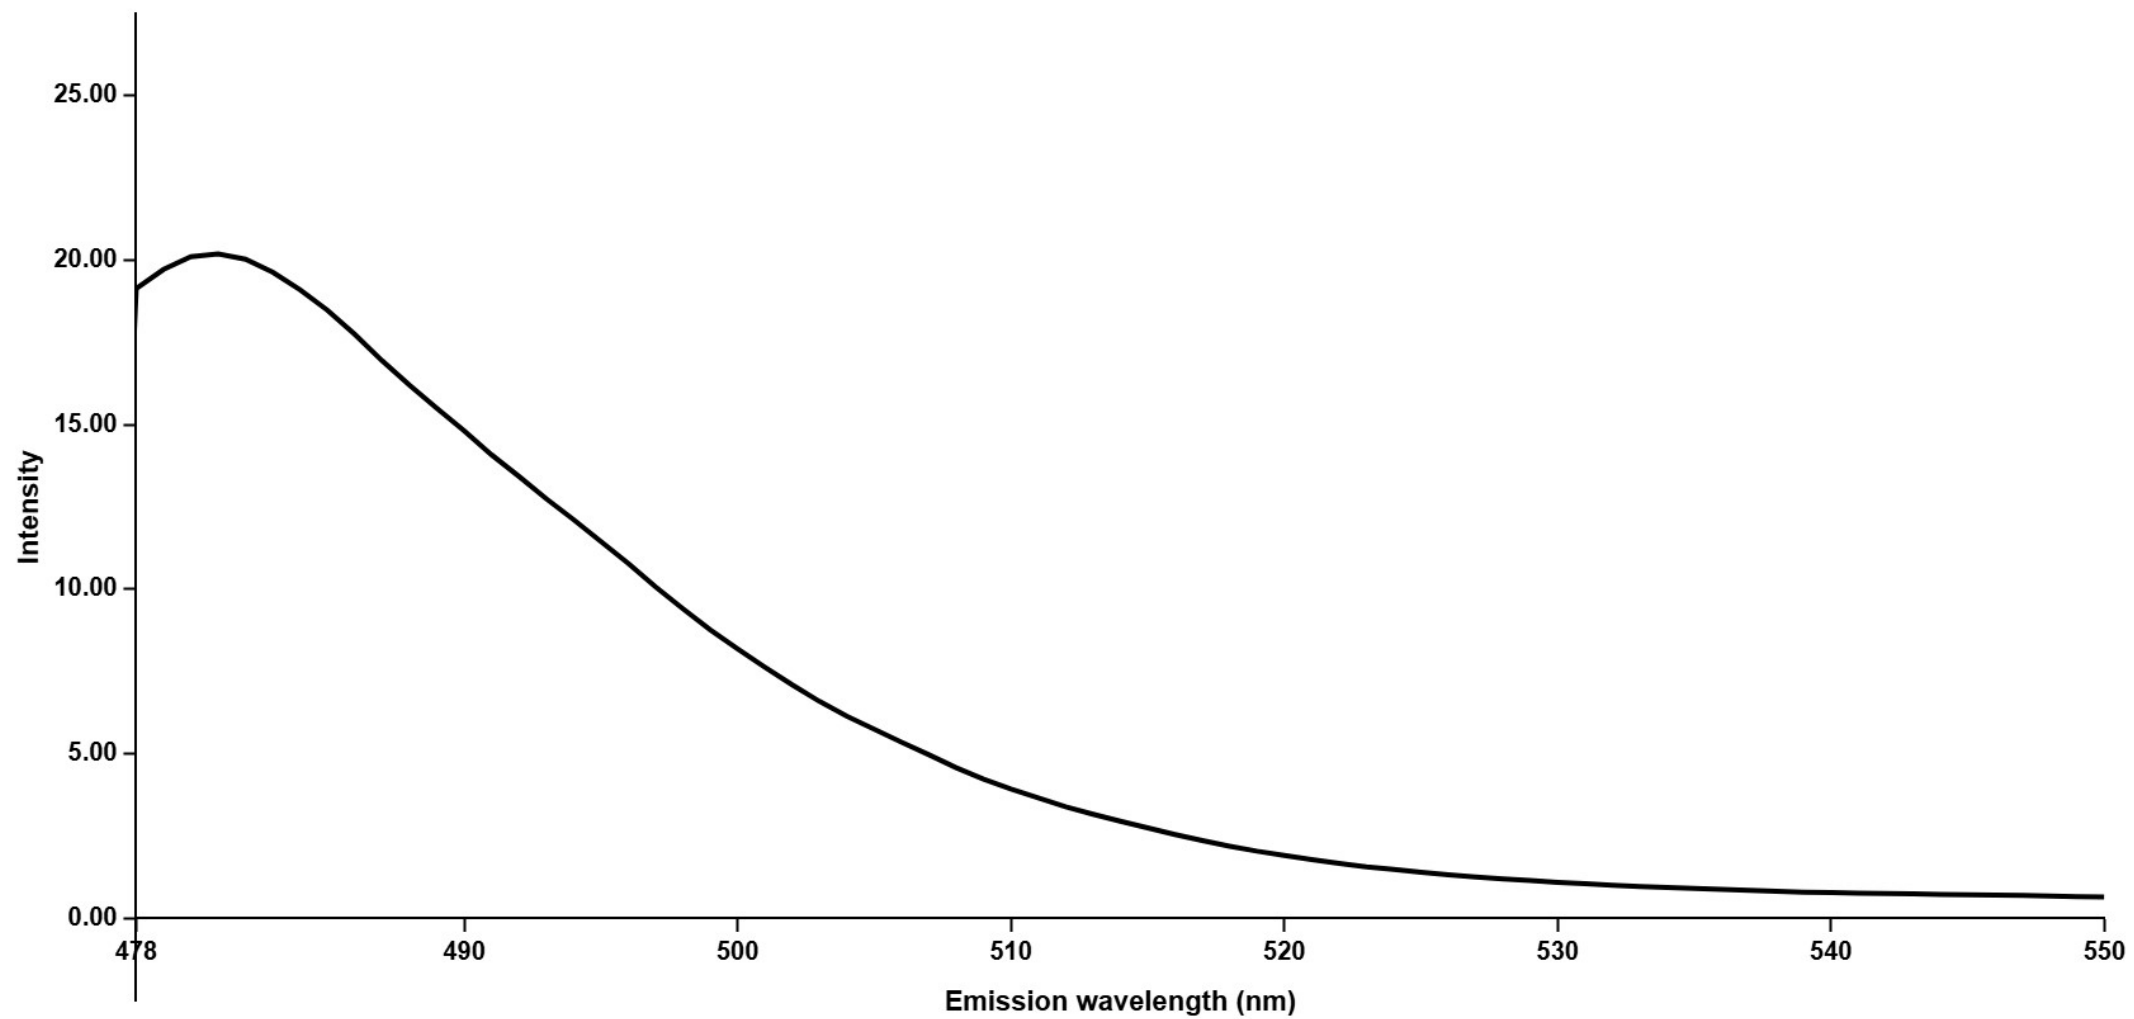

Figure S73. 2D fluorescence emission spectra for compound 3 at an excitation wavelength of  $\lambda_{\text{ex}} = 468$  nm, showing intensity as a function of emission wavelength.

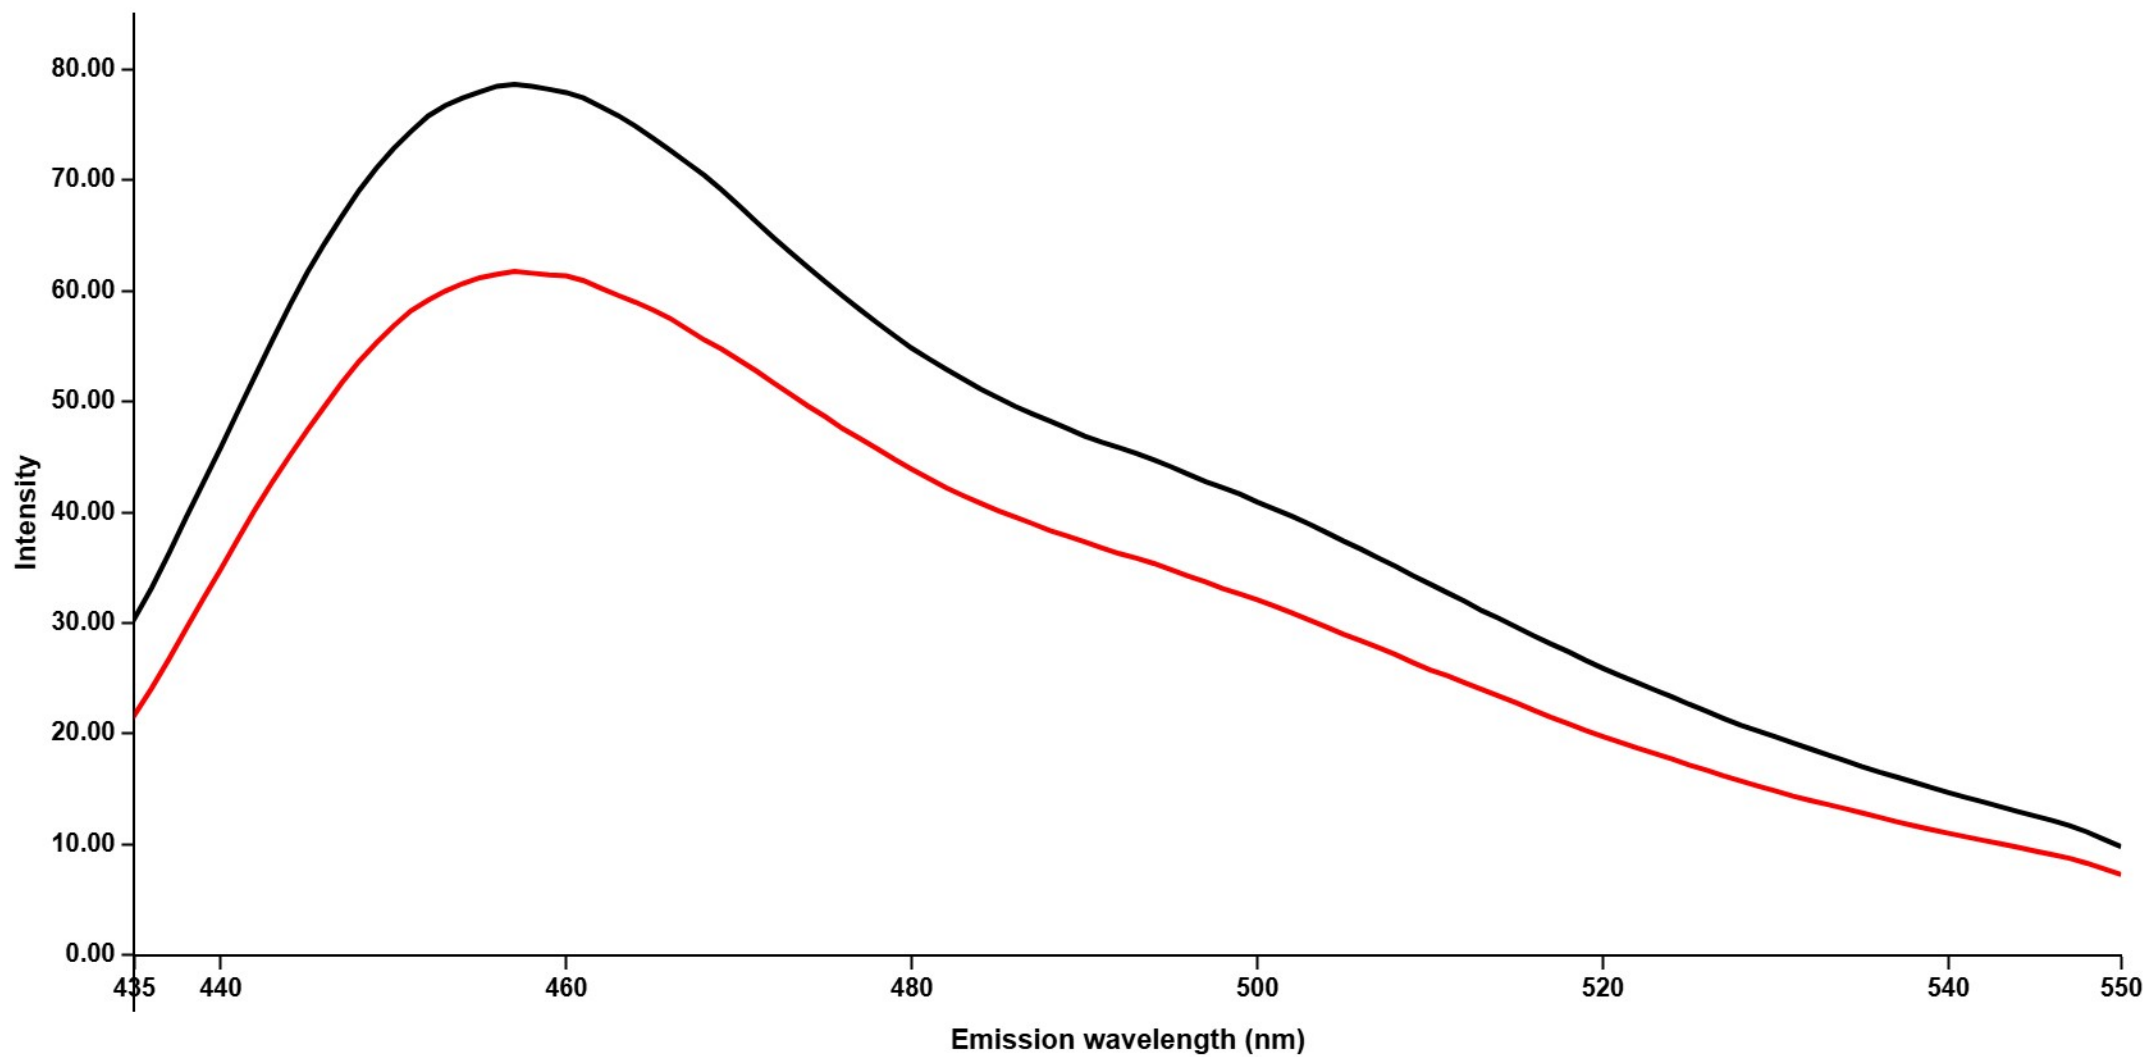

Figure S74. 2D fluorescence emission spectra for compound 4 at two excitation wavelengths: black line at  $\lambda_{ex} = 424$  nm and red line at  $\lambda_{ex} = 366$  nm, showing intensity as a function of emission wavelength.

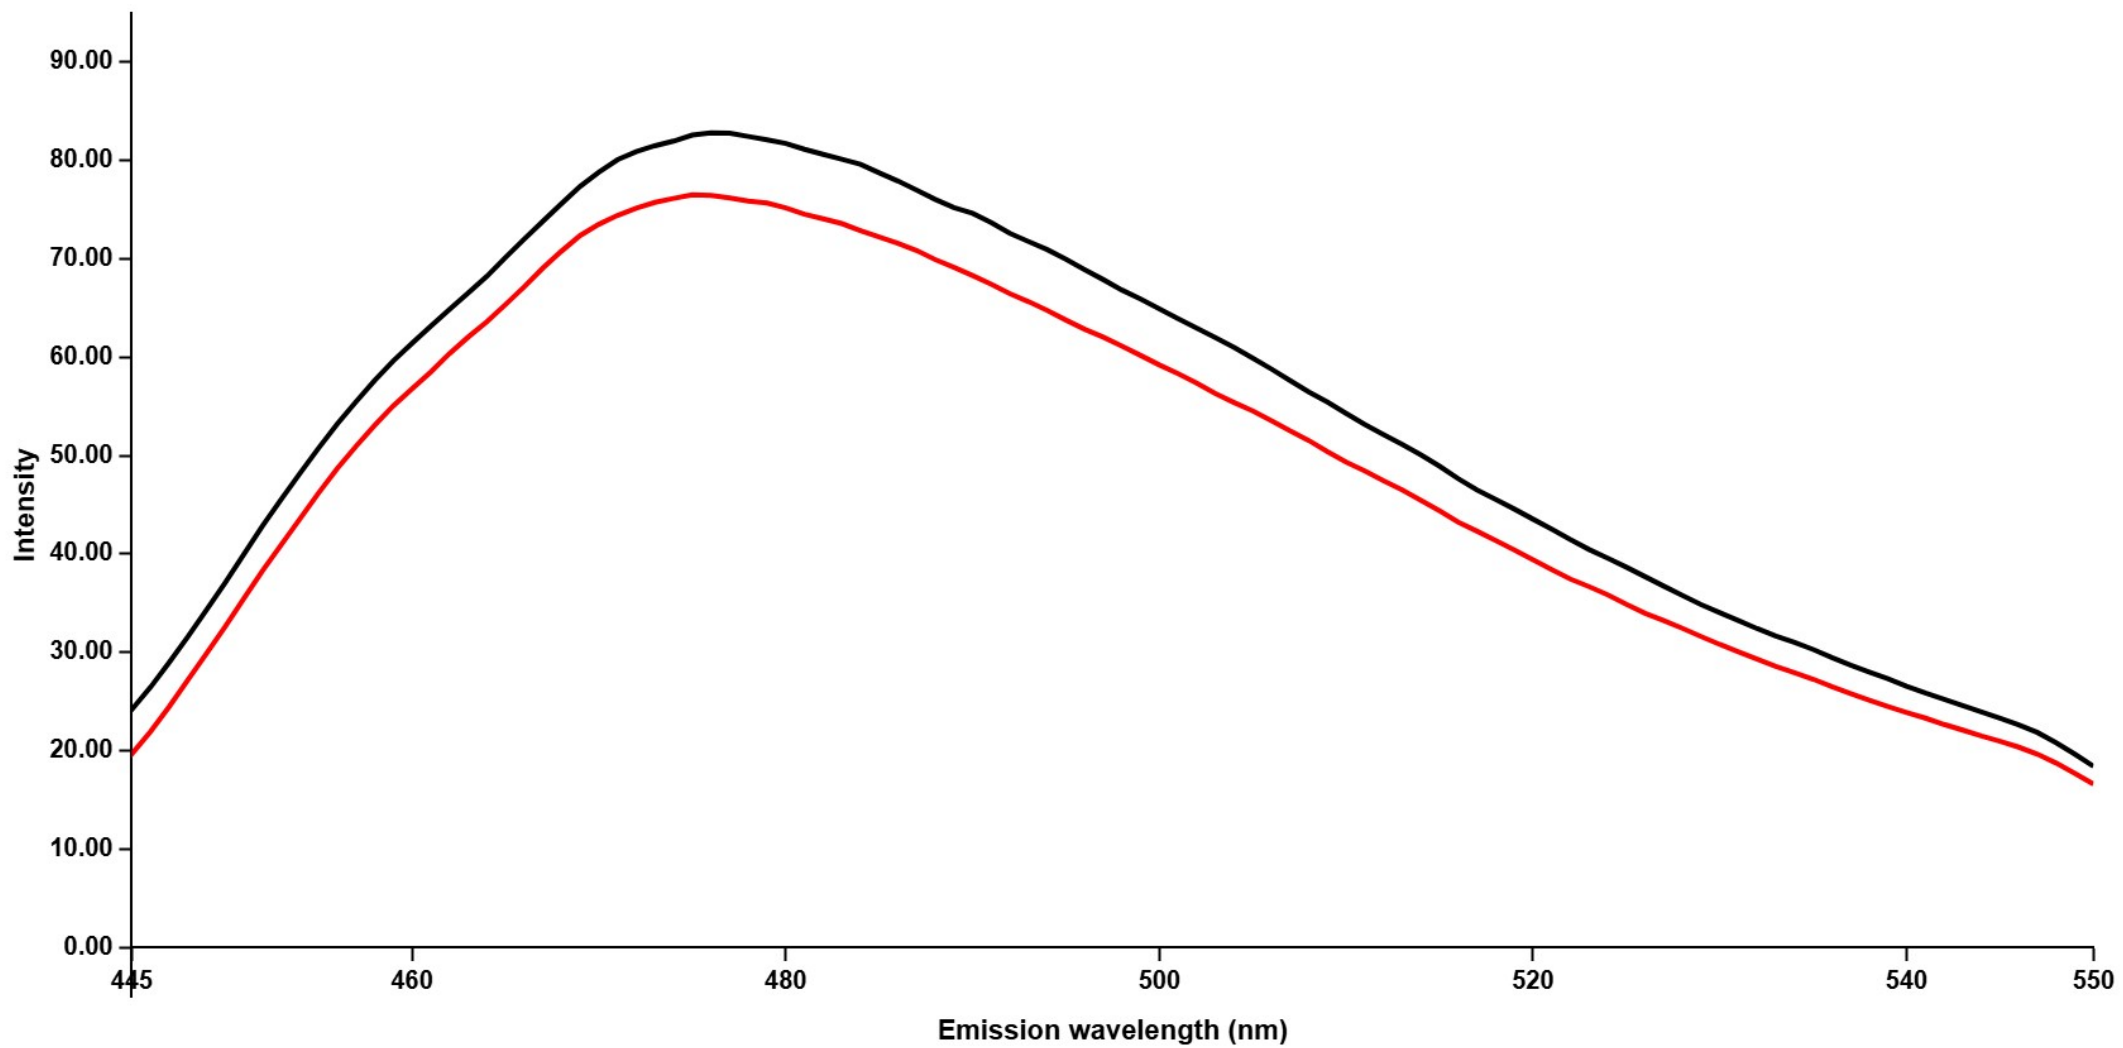

Figure S75. 2D fluorescence emission spectra for compound 5 at two excitation wavelengths: black line at  $\lambda_{ex}$  = 431 nm and red line at  $\lambda_{ex}$  = 359 nm, showing intensity as a function of emission wavelength.

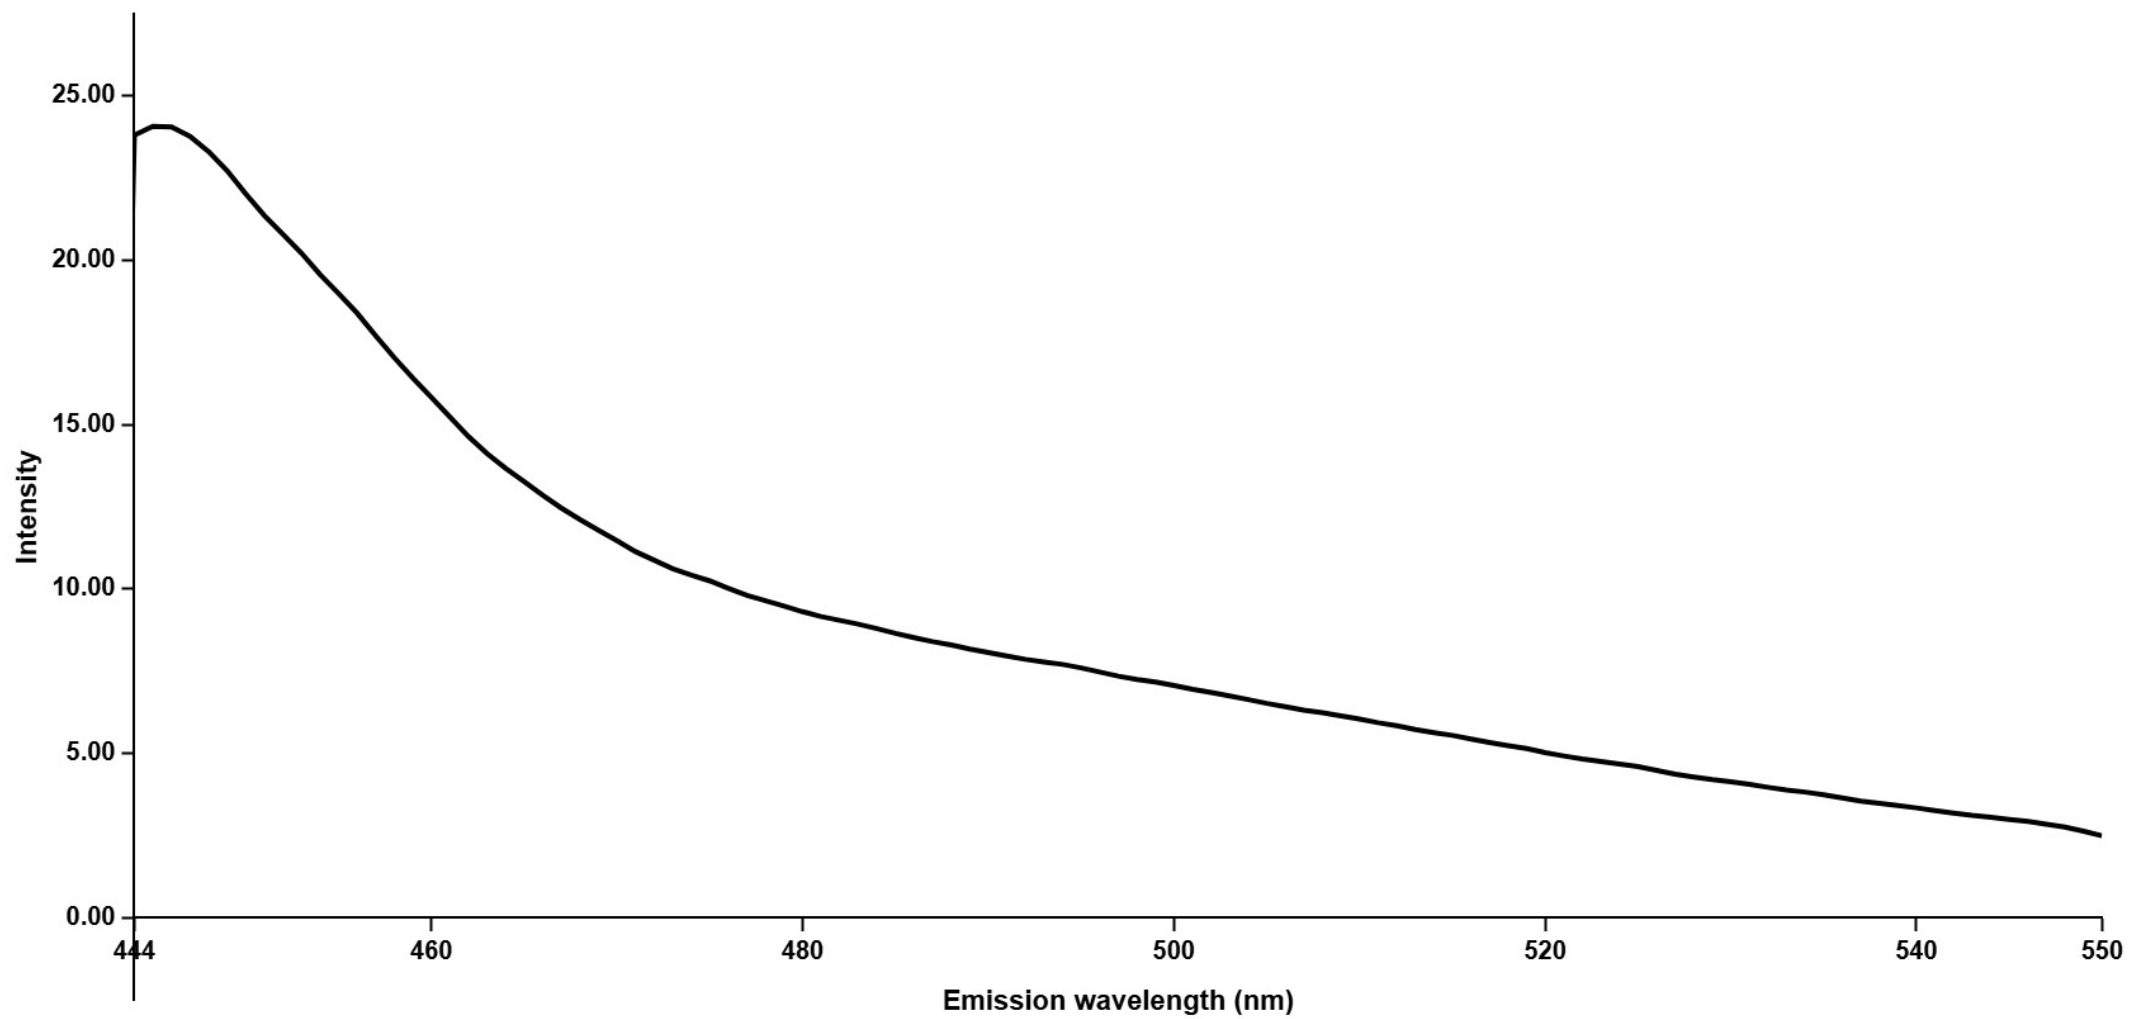

Figure S76. 2D fluorescence emission spectra for compound 6 at an excitation wavelength of  $\lambda_{\text{ex}} = 434$  nm, showing intensity as a function of emission wavelength.



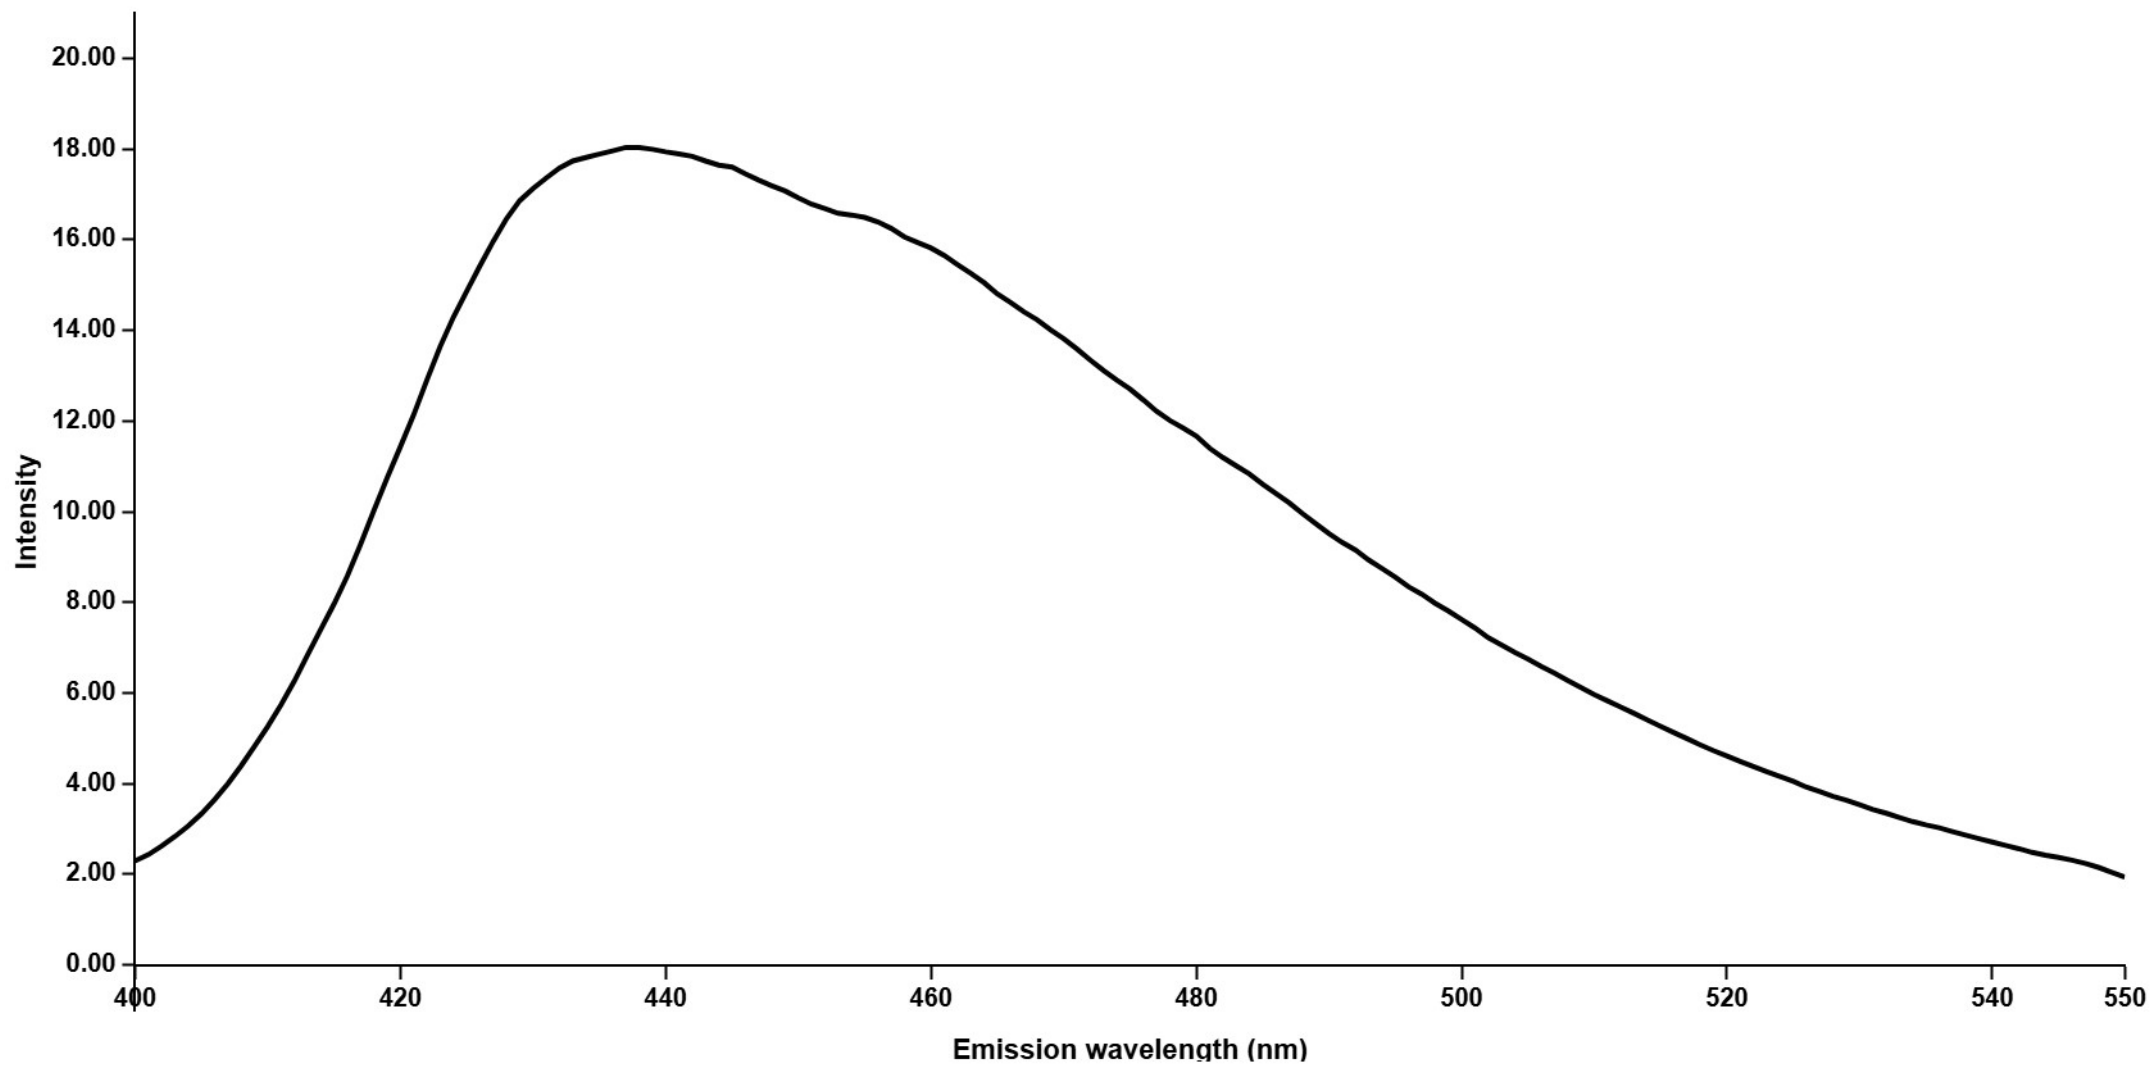

Figure S77. 2D fluorescence emission spectra for compound 6 at an excitation wavelength of  $\lambda_{\text{ex}} = 364$  nm, showing intensity as a function of emission wavelength.

Table S1. Crystal data and structure refinement details for studied compounds.

| Compound(CCDC number)                                         | 1 (2350550)                                                   | 2 (2350546)                                       | 3 (23505440)                                                  | 4 (2350548)                                                   | 5 (2350551)                                                      | 6 (2350543)                                        | 7 (2350542)                                                   | 8 (2350545)                                                   | 9 (2350547)                                                   | 10 (2350549)                                                    |
|---------------------------------------------------------------|---------------------------------------------------------------|---------------------------------------------------|---------------------------------------------------------------|---------------------------------------------------------------|------------------------------------------------------------------|----------------------------------------------------|---------------------------------------------------------------|---------------------------------------------------------------|---------------------------------------------------------------|-----------------------------------------------------------------|
| Empirical formula                                             | C <sub>15</sub> H <sub>16</sub> N <sub>2</sub> O <sub>2</sub> | C <sub>16</sub> H <sub>19</sub> N <sub>3</sub> O  | C <sub>14</sub> H <sub>14</sub> N <sub>2</sub> O <sub>2</sub> | C <sub>18</sub> H <sub>21</sub> N <sub>3</sub> O <sub>2</sub> | C <sub>14</sub> H <sub>12</sub> Cl <sub>2</sub> N <sub>2</sub> O | C <sub>13</sub> H <sub>15</sub> BrN <sub>2</sub> O | C <sub>12</sub> H <sub>11</sub> N <sub>3</sub> O <sub>4</sub> | C <sub>14</sub> H <sub>13</sub> N <sub>3</sub> O <sub>3</sub> | C <sub>16</sub> H <sub>15</sub> N <sub>3</sub> O <sub>3</sub> | C <sub>12</sub> H <sub>11</sub> N <sub>3</sub> O <sub>3</sub> S |
| Formula weight                                                | 256.30                                                        | 269.34                                            | 242.27                                                        | 311.38                                                        | 295.16                                                           | 319.20                                             | 261.24                                                        | 271.27                                                        | 297.31                                                        | 277.30                                                          |
| Temperature (K)                                               | 99.9(5)                                                       | 100.01(13)                                        | 99.9(5)                                                       | 99.9(6)                                                       | 99.9(5)                                                          | 100.02(10)                                         | 99.9(5)                                                       | 99.9(5)                                                       | 99.9(6)                                                       | 105(7)                                                          |
| Crystal system                                                | orthorhombic                                                  | monoclinic                                        | monoclinic                                                    | orthorhombic                                                  | monoclinic                                                       | orthorhombic                                       | triclinic                                                     | monoclinic                                                    | monoclinic                                                    | monoclinic                                                      |
| Space group                                                   | P2 <sub>1</sub> 2 <sub>1</sub> 2 <sub>1</sub>                 | P2 <sub>1</sub>                                   | P2 <sub>1</sub> /c                                            | P2 <sub>1</sub> 2 <sub>1</sub> 2 <sub>1</sub>                 | P2 <sub>1</sub> /c                                               | P2 <sub>1</sub> 2 <sub>1</sub> 2 <sub>1</sub>      | P-1                                                           | P2 <sub>1</sub> /c                                            | P2 <sub>1</sub> /c                                            | P2 <sub>1</sub> /n                                              |
| a (Å)                                                         | 5.19160(10)                                                   | 11.95080(10)                                      | 26.7493(5)                                                    | 5.97860(10)                                                   | 4.61560(10)                                                      | 5.30400(10)                                        | 6.4229(3)                                                     | 14.3070(3)                                                    | 16.2030(2)                                                    | 9.92380(10)                                                     |
| b (Å)                                                         | 8.53580(10)                                                   | 7.29470(10)                                       | 5.80660(10)                                                   | 7.24420(10)                                                   | 9.49270(10)                                                      | 8.79880(10)                                        | 7.1501(2)                                                     | 7.29090(10)                                                   | 13.03460(10)                                                  | 23.4635(3)                                                      |
| c (Å)                                                         | 29.4619(5)                                                    | 16.1641(2)                                        | 7.7294(2)                                                     | 36.2940(5)                                                    | 30.1240(4)                                                       | 29.2208(3)                                         | 13.0240(4)                                                    | 13.4037(2)                                                    | 6.76630(10)                                                   | 11.4920(2)                                                      |
| α (°)                                                         | 90                                                            | 90                                                | 90                                                            | 90                                                            | 90                                                               | 90                                                 | 74.165(2)                                                     | 90                                                            | 90                                                            | 90                                                              |
| β (°)                                                         | 90                                                            | 97.8960(10)                                       | 95.511(2)                                                     | 90                                                            | 93.5470(10)                                                      | 90                                                 | 84.153(3)                                                     | 114.076(2)                                                    | 94.0550(10)                                                   | 105.8050(10)                                                    |
| γ (°)                                                         | 90                                                            | 90                                                | 90                                                            | 90                                                            | 90                                                               | 90                                                 | 86.204(3)                                                     | 90                                                            | 90                                                            | 90                                                              |
| Volume (Å <sup>3</sup> )                                      | 1305.59(4)                                                    | 1395.79(3)                                        | 1195.00(4)                                                    | 1571.90(4)                                                    | 1317.34(4)                                                       | 1363.70(3)                                         | 571.97(4)                                                     | 1276.52(4)                                                    | 1425.46(3)                                                    | 2574.71(6)                                                      |
| Z                                                             | 4                                                             | 4                                                 | 4                                                             | 4                                                             | 4                                                                | 4                                                  | 2                                                             | 4                                                             | 4                                                             | 8                                                               |
| ρ <sub>calc</sub> (g/cm <sup>3</sup> )                        | 1.304                                                         | 1.282                                             | 1.347                                                         | 1.316                                                         | 1.488                                                            | 1.555                                              | 1.517                                                         | 1.412                                                         | 1.385                                                         | 1.431                                                           |
| μ (mm <sup>-1</sup> )                                         | 0.709                                                         | 0.652                                             | 0.744                                                         | 0.702                                                         | 4.371                                                            | 4.050                                              | 0.986                                                         | 0.845                                                         | 0.808                                                         | 2.326                                                           |
| F(000)                                                        | 544.0                                                         | 576.0                                             | 512.0                                                         | 664.0                                                         | 608.0                                                            | 648.0                                              | 272.0                                                         | 568.0                                                         | 624.0                                                         | 1152.0                                                          |
| Crystal size (mm <sup>3</sup> )                               | 0.221 × 0.085 × 0.052                                         | 0.251 × 0.033 × 0.018                             | 0.176 × 0.126 × 0.054                                         | 0.238 × 0.074 × 0.025                                         | 0.36 × 0.09 × 0.05                                               | 0.207 × 0.031 × 0.028                              | 0.324 × 0.066 × 0.034                                         | 0.287 × 0.195 × 0.102                                         | 0.17 × 0.136 × 0.02                                           | 0.16 × 0.12 × 0.07                                              |
| Radiation                                                     | Cu Kα (λ = 1.54184)                                           | Cu Kα (λ = 1.54184)                               | Cu Kα (λ = 1.54184)                                           | Cu Kα (λ = 1.54184)                                           | Cu Kα (λ = 1.54184)                                              | Cu Kα (λ = 1.54184)                                | Cu Kα (λ = 1.54184)                                           | Cu Kα (λ = 1.54184)                                           | Cu Kα (λ = 1.54184)                                           | Cu Kα (λ = 1.54184)                                             |
| 2θ range for data collect. (°)                                | 10.792 to 158.232                                             | 5.52 to 158.88                                    | 9.966 to 158.894                                              | 9.748 to 159.114                                              | 5.878 to 158.858                                                 | 6.05 to 159.344                                    | 7.082 to 159.52                                               | 13.24 to 158.876                                              | 8.716 to 159.158                                              | 7.536 to 158.642                                                |
| Index ranges                                                  | -6 ≤ h ≤ 6, -10 ≤ k ≤ 8, -35 ≤ l ≤ 36                         | -15 ≤ h ≤ 15, -7 ≤ k ≤ 9, -20 ≤ l ≤ 20            | -32 ≤ h ≤ 32, -5 ≤ k ≤ 7, -9 ≤ l ≤ 8                          | -7 ≤ h ≤ 5, -9 ≤ k ≤ 9, -46 ≤ l ≤ 45                          | -4 ≤ h ≤ 5, -11 ≤ k ≤ 11, -32 ≤ l ≤ 38                           | -6 ≤ h ≤ 5, -10 ≤ k ≤ 11, -37 ≤ l ≤ 35             | -7 ≤ h ≤ 8, -8 ≤ k ≤ 8, -16 ≤ l ≤ 16                          | -17 ≤ h ≤ 16, -8 ≤ k ≤ 9, -16 ≤ l ≤ 15                        | -19 ≤ h ≤ 20, -16 ≤ k ≤ 15, -8 ≤ l ≤ 7                        | -12 ≤ h ≤ 12, -24 ≤ k ≤ 29, -14 ≤ l ≤ 13                        |
| Reflections collected/independent                             | 13101/2692                                                    | 27539/4881                                        | 12265/2425                                                    | 29983/3310                                                    | 13626/2694                                                       | 13843/2847                                         | 2527/2527                                                     | 12901/2536                                                    | 27673/3013                                                    | 26227/5353                                                      |
| R <sub>int</sub>                                              | 0.0318                                                        | 0.0377                                            | 0.0265                                                        | 0.0644                                                        | 0.0261                                                           | 0.0285                                             | -                                                             | 0.0220                                                        | 0.0324                                                        | 0.0231                                                          |
| Data/restraints/parameters                                    | 2692/0/177                                                    | 4881/1/373                                        | 2425/0/170                                                    | 3310/0/212                                                    | 2694/0/176                                                       | 2847/0/177                                         | 2527/0/177                                                    | 2536/0/182                                                    | 3013/0/203                                                    | 5353/0/351                                                      |
| Goodness-of-fit on F <sup>2</sup>                             | 1.047                                                         | 1.067                                             | 1.198                                                         | 1.194                                                         | 1.086                                                            | 1.042                                              | 1.115                                                         | 1.080                                                         | 1.275                                                         | 1.063                                                           |
| Final R indexes [I > 2σ(I)]                                   | R <sub>1</sub> = 0.0286, wR <sub>2</sub> = 0.0734             | R <sub>1</sub> = 0.0351, wR <sub>2</sub> = 0.0937 | R <sub>1</sub> = 0.0478, wR <sub>2</sub> = 0.1290             | R <sub>1</sub> = 0.0598, wR <sub>2</sub> = 0.0936             | R <sub>1</sub> = 0.0240, wR <sub>2</sub> = 0.0659                | R <sub>1</sub> = 0.0209, wR <sub>2</sub> = 0.0507  | R <sub>1</sub> = 0.0377, wR <sub>2</sub> = 0.1186             | R <sub>1</sub> = 0.0351, wR <sub>2</sub> = 0.0972             | R <sub>1</sub> = 0.0612, wR <sub>2</sub> = 0.1734             | R <sub>1</sub> = 0.0307, wR <sub>2</sub> = 0.0870               |
| R indexes (all data)                                          | R <sub>1</sub> = 0.0303, wR <sub>2</sub> = 0.0746             | R <sub>1</sub> = 0.0377, wR <sub>2</sub> = 0.0990 | R <sub>1</sub> = 0.0511, wR <sub>2</sub> = 0.1303             | R <sub>1</sub> = 0.0637, wR <sub>2</sub> = 0.0953             | R <sub>1</sub> = 0.0249, wR <sub>2</sub> = 0.0664                | R <sub>1</sub> = 0.0218, wR <sub>2</sub> = 0.0510  | R <sub>1</sub> = 0.0399, wR <sub>2</sub> = 0.1211             | R <sub>1</sub> = 0.0368, wR <sub>2</sub> = 0.0985             | R <sub>1</sub> = 0.0649, wR <sub>2</sub> = 0.1747             | R <sub>1</sub> = 0.0340, wR <sub>2</sub> = 0.0890               |
| Largest diff. peak and hole (e <sup>-</sup> Å <sup>-3</sup> ) | 0.19/-0.18                                                    | 0.25/-0.22                                        | 0.28/-0.26                                                    | 0.27/-0.22                                                    | 0.22/-0.21                                                       | 0.26/-0.27                                         | 0.23/-0.32                                                    | 0.41/-0.40                                                    | 0.44/-0.27                                                    | 0.29/-0.28                                                      |

Table S2. Selected bond lengths (Å) for the studied compounds.

| Compound | 1        | 2* (C1-C16) | 2*(C21-C36) | 3        | 4        | 5          | 6        | 7          | 8          | 9        | 10*(C1-C12) | 10*(C21-C32) |
|----------|----------|-------------|-------------|----------|----------|------------|----------|------------|------------|----------|-------------|--------------|
| C1—O1    | 1.423(2) | 1.425(3)    | 1.421(3)    | 1.427(3) | 1.427(3) | 1.4267(15) | 1.419(3) | 1.4284(15) | 1.4323(13) | 1.429(3) | 1.4253(15)  | 1.4276(16)   |
| C2—O1    | 1.373(2) | 1.381(2)    | 1.383(3)    | 1.381(2) | 1.373(3) | 1.3691(14) | 1.371(3) | 1.3715(15) | 1.3807(13) | 1.375(3) | 1.3772(14)  | 1.3774(14)   |
| C5—N1    | 1.414(2) | 1.400(3)    | 1.412(3)    | 1.407(3) | 1.399(3) | 1.4058(15) | 1.403(3) | 1.3996(16) | 1.3997(14) | 1.403(3) | 1.4049(15)  | 1.4042(15)   |
| N1—N2    | 1.343(2) | 1.376(2)    | 1.379(2)    | 1.359(2) | 1.367(3) | 1.3571(14) | 1.360(3) | 1.3346(15) | 1.3548(13) | 1.352(3) | 1.3352(14)  | 1.3408(14)   |
| C8—N2    | 1.302(2) | 1.287(3)    | 1.287(3)    | 1.293(3) | 1.287(3) | 1.2830(15) | 1.296(3) | 1.2965(17) | 1.2888(14) | 1.291(3) | 1.2947(15)  | 1.2948(15)   |
| C8—C9    | 1.448(2) | 1.462(3)    | 1.453(3)    | 1.452(3) | 1.463(3) | 1.4651(16) | 1.485(4) | 1.4314(17) | 1.4579(15) | 1.435(4) | 1.4355(17)  | 1.4337(16)   |

\*Z'=2

Table S3. Selected bond angles (°) for the studied compounds.

| Compound | 1          | 2* (C1-C16) | 2* (C21-C36) | 3          | 4        | 5          | 6        | 7          | 8          | 9        | 10*(C1-C12) | 10*(C21-C32) |
|----------|------------|-------------|--------------|------------|----------|------------|----------|------------|------------|----------|-------------|--------------|
| C1—O1—C2 | 116.85(13) | 116.88(16)  | 116.87(18)   | 116.57(17) | 117.1(2) | 116.89(9)  | 118.1(2) | 116.82(10) | 117.10(8)  | 116.8(2) | 117.50(10)  | 117.63(10)   |
| C3—C2—O1 | 124.80(15) | 124.50(19)  | 124.8(2)     | 115.61(19) | 115.2(2) | 124.92(11) | 125.0(3) | 115.98(11) | 124.53(9)  | 115.5(2) | 124.62(11)  | 124.70(11)   |
| C7—C2—O1 | 115.83(14) | 115.55(18)  | 115.43(19)   | 124.53(19) | 125.3(2) | 115.75(10) | 115.4(2) | 124.64(11) | 115.42(9)  | 124.5(2) | 115.69(11)  | 115.44(11)   |
| C4—C5—N1 | 122.80(15) | 122.92(18)  | 122.1(2)     | 123.04(19) | 121.5(2) | 122.39(10) | 122.6(2) | 122.14(11) | 123.12(10) | 122.0(2) | 121.61(11)  | 121.60(11)   |
| C6—C5—N1 | 118.52(14) | 118.48(18)  | 118.66(19)   | 117.31(19) | 119.4(2) | 118.47(10) | 118.1(2) | 118.41(11) | 117.50(9)  | 118.3(2) | 118.74(11)  | 118.98(11)   |
| C5—N1—N2 | 119.85(14) | 119.09(17)  | 116.91(17)   | 120.76(18) | 118.7(2) | 118.78(10) | 119.6(2) | 120.78(11) | 120.68(9)  | 120.9(2) | 119.52(10)  | 119.89(10)   |
| N1—N2—C8 | 117.90(14) | 114.91(17)  | 115.72(19)   | 116.55(18) | 117.2(2) | 117.81(10) | 118.3(2) | 117.10(11) | 115.75(9)  | 116.3(2) | 118.72(10)  | 117.60(10)   |
| N2—C8—C9 | 120.48(14) | 122.12(19)  | 122.67(19)   | 122.0(2)   | 121.5(2) | 119.31(10) | 116.1(2) | 117.88(11) | 121.98(10) | 121.0(3) | 117.77(11)  | 119.02(11)   |

\*Z'=2

Table S4. Interplane angles ( $\varphi$ ) between phenylene and phenylene/furan/thiophene ring mean planes, and selected torsion angles ( $\chi$ ) in the studied compounds.

| Compound            | $\varphi$<br>( $^\circ$ ) | $\chi$ [C5-N1-N2-C8]<br>( $^\circ$ ) | $\chi$ [N1-N2-C8-C9]<br>( $^\circ$ ) | $\chi$ [N2-C8-C9-C10]<br>( $^\circ$ ) | $\chi$ [C8-C9-C10-C11]<br>( $^\circ$ ) |
|---------------------|---------------------------|--------------------------------------|--------------------------------------|---------------------------------------|----------------------------------------|
| <b>1</b>            | 2.6                       | -174.55(14)                          | -179.40(14)                          | -                                     | -                                      |
| <b>2* (C1-C16)</b>  | 15.1                      | 167.7(2)                             | 175.24(19)                           | -                                     | -                                      |
| <b>2* (C21-C36)</b> | 28.5                      | -155.0(2)                            | 179.4(2)                             | -                                     | -                                      |
| <b>3</b>            | 16.5                      | -162.61(19)                          | -179.30(18)                          | -                                     | -                                      |
| <b>4</b>            | 13.1                      | -174.8(2)                            | 179.3(2)                             | -                                     | -                                      |
| <b>5</b>            | 10.1                      | -168.37(10)                          | -176.07(9)                           | -                                     | -                                      |
| <b>6</b>            | 4.7                       | 173.5(2)                             | 177.9(2)                             | -                                     | -                                      |
| <b>7</b>            | 3.4                       | 177.54(11)                           | 179.94(10)                           | -                                     | -                                      |
| <b>8</b>            | 14.4                      | 167.35(10)                           | 177.22(9)                            | -                                     | -                                      |
| <b>9</b>            | 7.2                       | -178.6(2)                            | 179.3(2)                             | -175.4(3)                             | -175.8(3)                              |
| <b>10*(C1-C12)</b>  | 20.5                      | -179.93(11)                          | -178.06(10)                          | -                                     | -                                      |
| <b>10*(C21-C32)</b> | 24.9                      | -177.28(11)                          | 177.01(11)                           | -                                     | -                                      |

\*Z=2

Table S5. Classical hydrogen bonds in studied compounds [ $G_d^a(n)$  – unitary graph set].

| D-H...A                         | d(D—H) (Å) | d(H...A) (Å) | d(D...A) (Å) | $\angle$ (DHA) ( $^\circ$ ) | $G_d^a(n)$  |
|---------------------------------|------------|--------------|--------------|-----------------------------|-------------|
| <b>2</b>                        |            |              |              |                             |             |
| N1—H1...N1 <sup>(i)</sup>       | 0.90(3)    | 2.77(3)      | 3.255(3)     | 115(2)                      | C(2)        |
| N1—H1...N21                     | 0.90(3)    | 3.21(3)      | 3.712(3)     | 118(2)                      | D(2)        |
| N21—H21...N1                    | 0.92(3)    | 2.90(2)      | 3.255(3)     | 105(2)                      | D(2)        |
| N21—H21...N2 <sup>(ii)</sup>    | 0.92(3)    | 3.29(2)      | 4.169(3)     | 163(2)                      | D(2)        |
| <b>3</b>                        |            |              |              |                             |             |
| N1—H1...O2 <sup>(iii)</sup>     | 0.89(3)    | 2.51(3)      | 3.069(2)     | 121.2(18)                   | C(7)        |
| N1—H1...O2 <sup>(iv)</sup>      | 0.89(3)    | 2.53(2)      | 3.127(2)     | 125(2)                      | C(7)        |
| O2—H2...N2                      | 0.93(3)    | 1.82(3)      | 2.637(2)     | 146(2)                      | S(6)        |
| <b>4</b>                        |            |              |              |                             |             |
| N1—H1...O2 <sup>(v)</sup>       | 0.86(3)    | 2.51(3)      | 3.264(3)     | 148(3)                      | C(12)       |
| <b>7</b>                        |            |              |              |                             |             |
| N1—H1...O4 <sup>(vi)</sup>      | 0.891(17)  | 2.153(16)    | 2.9916(14)   | 156.7(16)                   | $R_2^2(18)$ |
| <b>8</b>                        |            |              |              |                             |             |
| N1—H1...O1 <sup>(iv)</sup>      | 0.865(14)  | 2.263(14)    | 3.0100(12)   | 144.7(13)                   | C(7)        |
| <b>10</b>                       |            |              |              |                             |             |
| N1—H1...O2 <sup>(vii)</sup>     | 0.864(16)  | 2.561(15)    | 3.3236(15)   | 147.7(12)                   | C(9)        |
| N1—H1...O3 <sup>(vii)</sup>     | 0.864(16)  | 2.372(16)    | 3.1855(16)   | 157.2(13)                   | C(9)        |
| N21—H21...O22 <sup>(viii)</sup> | 0.877(16)  | 2.520(15)    | 3.3074(15)   | 149.8(12)                   | C(9)        |
| N21—H21...O23 <sup>(viii)</sup> | 0.877(16)  | 2.354(16)    | 3.1740(16)   | 155.8(12)                   | C(9)        |

Symmetry transformations used to generate equivalent atoms: (i)  $-x+1, y+0.5, -z+1$ ; (ii)  $-x+1, y-0.5, -z+1$ ; (iii)  $x, y+1, z$ ; (iv)  $x, -y+0.5, z+0.5$ ; (v)  $x-0.5, -y+1.5, -z+1$ ; (vi)  $-x, -y+2, -z+1$ ; (vii)  $x-0.5, -y+0.5, z+0.5$ ; (viii)  $x+0.5, -y+1.5, z-0.5$ .

Table S6. Stacking interactions in the studied compounds. Each ring, R, is indicated by one membered atom. The d is a distance between centroid of I, Cg(I), and centroid of J, Cg(J),  $\alpha$  is a dihedral angle between planes of rings I and J,  $\beta$  is an angle between Cg(I)-Cg(J) vector and normal to plane I,  $d_p$  is a perpendicular distance of Cg(J) on the ring I plane.

| I...J                         | d (Å)      | $\alpha$ (°) | $\beta$ (°) | $d_p$ (Å)  |
|-------------------------------|------------|--------------|-------------|------------|
| <b>7</b>                      |            |              |             |            |
| R(C2)•••R(C9) <sup>(i)</sup>  | 3.4582(8)  | 3.43(7)      | 15.0        | 3.3402(6)  |
| R(C2)•••R(C9) <sup>(ii)</sup> | 3.7360(8)  | 3.43(7)      | 27.1        | 3.3268(6)  |
| <b>8</b>                      |            |              |             |            |
| R(C9)•••R(C9) <sup>(i)</sup>  | 3.6324(6)  | 0.03(5)      | 23.4        | 3.3334(4)  |
| <b>9</b>                      |            |              |             |            |
| R(C2)•••R(C11) <sup>(i)</sup> | 3.8321(15) | 7.22(13)     | 24.7        | 3.4820(11) |

Symmetry transformations used to generate equivalent atoms: (i)  $-x+1, -y+1, -z+1$ ; (ii)  $-x+1, -y+2, -z+1$ .

Table S7. Absorption data from UV-Vis diffuse reflectance spectra (experimental) and quantum-mechanical calculations (theoretical) for the studied compounds.

| Compound  | Wavelength of absorption maxima (nm) |             | Oscillator strength |
|-----------|--------------------------------------|-------------|---------------------|
|           | Experimental                         | Theoretical |                     |
| <b>1</b>  |                                      | 224         | 0.212               |
|           |                                      | 272         | 0.324               |
|           | 395                                  | 300         | 0.106               |
|           |                                      | 353         | 1.014               |
|           | 450                                  | 385         | 0.013               |
| <b>2</b>  | 243                                  | 226         | 0.189               |
|           | 286                                  | 286         | 0.496               |
|           | 328                                  | 356         | 0.670               |
|           | 470                                  | 373         | 0.005               |
| <b>3</b>  | 236                                  | 245         | 0.544               |
|           | 299                                  | 302         | 0.080               |
|           | 356                                  | 351         | 0.775               |
|           | 415                                  | 397         | 0.010               |
|           |                                      | 453         | 0.003               |
| <b>4</b>  | 251                                  | 235         | 0.170               |
|           | 396                                  | 282         | 0.728               |
|           |                                      | 354         | 1.508               |
|           | 477                                  | 404         | 0.014               |
| <b>5</b>  |                                      | 408         | 0.009               |
|           | 253                                  | 222         | 0.193               |
|           |                                      | 267         | 0.553               |
|           | 341                                  | 306         | 0.062               |
|           | 400                                  | 359         | 1.206               |
| <b>6</b>  | 508                                  | 395         | 0.007               |
|           | 242                                  | 220         | 0.156               |
|           |                                      | 231         | 0.155               |
|           | 294                                  | 264         | 0.449               |
|           |                                      | 293         | 0.078               |
|           | 337                                  | 343         | 0.087               |
|           | 378                                  | 357         | 1.039               |
| 480       | 372                                  | 0.079       |                     |
| <b>7</b>  |                                      | 409         | 0.019               |
|           | 228                                  | 223         | 0.054               |
|           | 290                                  | 318         | 0.421               |
|           | 331                                  | 354         | 0.237               |
|           | 410                                  | 437         | 1.000               |
|           | 598                                  | 539         | 0.191               |
| <b>8</b>  |                                      | 575         | 0.096               |
|           | 251                                  | 240         | 0.191               |
|           |                                      | 297         | 0.444               |
|           | 365                                  | 312         | 0.312               |
|           |                                      | 339         | 0.205               |
| <b>9</b>  | 523                                  | 452         | 1.100               |
|           |                                      | 526         | 0.552               |
|           | 275                                  | 222         | 0.154               |
|           |                                      | 260         | 0.202               |
|           | 334                                  | 322         | 1.260               |
|           | 391                                  | 352         | 0.343               |
| <b>10</b> |                                      | 460         | 1.539               |
|           | 514                                  | 518         | 0.361               |
|           | 241                                  | 243         | 0.144               |
|           | 290                                  | 339         | 0.214               |
|           | 446                                  | 469         | 0.471               |
|           |                                      | 511         | 0.462               |
|           | 678                                  | 574         | 0.163               |
|           | 664                                  | 0.005       |                     |
